# Supplementary material for: Molecular Tools for the Detection of Nitrogen Cycling Archaea
Source: PubMed Central journal article supplement (PMC3556428; doi:10.1155/2013/676450), 2013-01-08
Supplement: 676450.f1.pdf [file 676450.f1.pdf]

>hbo:Hbor\_04420-Ar sulfite reductase, subunit beta (hemoprotein); K00366 ferredoxin-nitrite reductase [EC:1.7.7.1] (N)

ATGCCACGGACGTCGAGCGTTGGAAATCTGAGGTGTACGGGAACGAAATACGCGAACATCTGTACGAGTTCCG  
CAGAAGAAGGATGGGACGCAATCCCCGAGGACGAACACGACGAGTGGTTCGAGCGATTCAAATGGTGGGGACT  
GTACCACCAGCGGAACGGGCAGGAGTCGTACTTCATGATGCGGATTGGGACGCCAAACGGCGTTCTCGAACCG  
GGGCAACTGCGCGTTCGTCGGCGAAATCGCAGCGGAGTACGCCACCGGTCCGGGGACGAATCCGATCTTCGGTG  
ACGCTTATGCCGACTTCACGACCCGGCAGTCGATCCAACACTACTGGATCAACATCGAAGACGTGCCCGCGAT  
CTTCGAGAAGATGGAGAAAAACGGGTTGTCCGCCAGCAAGCGTGTGGTACTCGTGGCGAACATCGTCGGC  
AACCCCGTTCGCCGGGAAGGACGCTCAGGAAGTCATCGATGCGTGGCCCGTTATCCGCGAACTCAACGAGACGT  
TCAAAGGCAACGAGGATCACTCGAACCTCCCGCGTAAGTGGAAGGTTTCCGTGACGGGGTCCGCGGACGGGT  
CGGACAGGGGGACATCAACGACCTCGCCTTCGAACCGCGTACAAGGAGGTTGACGTCGAAGAGAAGGTTCGGT  
TTCAACGTCCGCGTTCGGCGCGGTCTCGCCCGCAACGAGGAGCGCTTTGCCCGGACATCGACGTGTGGGTTCG  
CTCCCGAGAACGTCTCCGACGTGGCGGGCGGCCTCTCTGCGCTCTTCCGCGACAACGGCGACCGCGAAAACCG  
CTACAACGCTCGTATCAAGTTCCTCGTAGACGAGTGGGGGCCGAGAAGGTTTCGAACGTCCTGCAGGAAGAG  
TACGTTGACTTCGAACTCCACACCGCAGGCCGCGACGTCCGCGAGGAGTACACGTACAACACCGGCAGTGGCG  
GACGAAACGACCTGATCGGCGTCCACGAACAGAAGGACGGCAACTACTTCGTTCGGCTTGAACGTTCTCGTCGG  
CCGATGGGTGCCGAAGACGTACTCGAACTCGCCGACCTCGCGGACGAGTACGGGTCCGGCGAAGTCCGTCTC  
TCTCAGCGGCAGAACGTCAATCGTCACCGACGTACCCGAAGAAGACCTCGACGACTTCTCGGCGAAGACCTGC  
TGGAACACTACTCGCCCGACCGTCCACCGTTCATGCGTGGCTCGGTTGCGTGTACCGGTACCGAGTTCTGTTT  
GCTCTCTATCGTGGAGACGAAGAACCAGCAAGTCCGCTACGCGCGGTGGCTGAAGGAGAACGTGCAACTTCCC  
GACGACATCGATCAGTTCACATCCACCTCTCCGGATGTACGGCCTCCTGCGCACAACCGCAGATTGCGGACA  
TCAGCCTCCGCGGTATGAAGACCCGAAAGAACGGCGAACCCGTCGAAGCACTCGACGTTGGCCTCGGCGGGCG  
TCTCGGCGAGGAACCGCAGTTCGCACGCTGGGTACCCAACGGATTCCCGTAGACGAGGTTCCGGGTGCAATC  
TCGAATCTGCTGGATCAGTTCAAAGCGAACCGTGAGGACGGCGAGTTCGTTCCGCGAGTTCGTTCGCCCGCAG  
ATGACGAGGAACCTCGACGAGTTCGTTCGAACCCGAGGAAACGGACTACGAGGACCCGATGATGCACAACACGAA  
GATGACGTGGTACCCCTACGCCGACGAGGACTCTATGGACGCGAGTCCAGCCCCGACGTTCCCTGACGACTCA  
CCGATGTCGGCGGACGATTGA

>hbo:Hbor\_39920-Ar sulfite reductase, beta subunit (hemoprotein); K00366 ferredoxin-nitrite reductase [EC:1.7.7.1] (N)

ATGAACACTGTTGAACGATGGAAACAAGAACAACATCCGCTCGATGTTATCGAGAACGTCTACGAGTACGCTG  
AGGGAGATTTTTCTTTTCGAGGAGATTGAGGCACAAGCAGGCGACGGCGAGTGGGAGCGTCTGAAATGGGCCGG  
AATGTACGCCACGGACGCCAGGACGACTACTTCATGCTTCGGACCAAAGTTCCCGGGGATTTCTCACGCCT  
GAACAGGCTGAAGCCATCGGTACGGTTGCCGACGAGTACGCTACCGCTCCCGAGGAGCACGGTGGCGAGGCAC  
AAAACGCAATCTGGGGTGCACGATTTCTTGGATCTCACACCCGTCAGGACGTCCAGATGCACTGGATCGCGGT  
CACCGACATACCCGCGATCTGGGACACGTACGAAGCAGTTGGCTTGACCACGATTTCAGGGCTGTGGTACTCC  
GCACGCAACGTCCTCGGCTGTCCGGCGGCCGGTCTTGACGATCACGAATGCTTCGATGCTCAGCCAGTTATCG  
ATGCTGTCTCGGACTTTTTACCAATAATCGGGAGTACGCCAACCTCCCGCGGAAGTTCAAGATGACCATAAC  
CGGGTGTCCAGGAGGACTGCGCCAGTCCCAGATCAACGACGTCCGGTCTGGTCCCGGCTCGAAAGCATGTTGAC  
GGCGAGGATATCTACGGCTTCCATGCCCGCGTCCGGTGGTGGTCTCTCAGATGGTCCGCGGATGGCCTCGAATA  
TCGATGTCTTCATCCGACCCGAAGACGCCGTGGAGTTCTGTCTGTCGCGGTTCGCTCAGACGTTTAAAGA  
TGATCGAACCAACCGTGGACTCTGTCCGATGCGCTATCTCGTCCAGCAGATGGGACCGAGTACATTTGAGGCG  
GCTGTTCCGACCGCTGTGATGTGATCTCCACTCTCGAGGACAGGATCTCACCCGTGGTTACCGGGGTGATC  
ACGTTGGCGTCCATCCTCAAAAACAGGACGGCCTGTTCTATGTCGGTTTTCAACGTTATCGCCGGACGAATGGG  
TGGCGACGAACTTACGGCGGTTGCACGAGCAGCAAGAAAACGGAACCGACGATACTTCGATTCGGTTGGCG  
ACTGACCAGAACTTCTTCTCACTCATATCCCCGAAGACAATCTTTCGGCACTACTGAACGAACCGTTCGCC  
GGAAGTACGAACACAATCCTGGGCCGTTTGCAAGGGGTGTGGTCCGGTGTACGGGCTCGGAGTTCGTCAGCTA  
CGGGATTATCGAGACGAAAAAGCGTGTTCACCGCTGGGCACGGGCACTAGACCGCCAGATAGCCACGCCGGAC  
GACCTTTCGGTGGTTCGGATGCACATGTCCGGTGTTCGGCGTCTGTGCACAGCCCCAAATCGCGGATATCG  
GATTCGCGCGGACGAGCGGTTGTGGTGGACGACTCCGAAGGAAGCAGCAACGAAGCGGGTGATAATATCACCGA  
GGGTATGGATGTCCGCTCGGCGGTAGTCTTGGGCCGACAACGAGTTCCTCGATTGGGTTGCGCACGCGATC  
CTGCGCAGGCCGTGATTCGGCACTACAGCAACTATTCACCGTCTTACCGAAGAGCGCGACCCCGACGAGC  
GATTCACGAGTGGGCCCGCGGGTGGCAACGACCGCCTTCGAAGGATCATGCAACGGGCGGACGCTAACGT  
TTCCGGAGGGGTGCTCATGACGGCTGA

>htu:Htur\_0174-Ar nitrite and sulphite reductase 4Fe-4S region; K00366  
ferredoxin-nitrite reductase [EC:1.7.7.1] (N)

ATGGTGCATAAGAAAGAAGAACAGAAGGAAGACTGCTACGGCGACGAAGTGCGGGAACACATCGAGCGGTTCCG  
CCGAGAACGGCGGCTTCGAGGCCATCCCGGACGACGAGATCGACAAATGGACCACCCGGTTCAAGTTCTGGGG  
CGTGTTCAGCAGCGCTCCGGCCAGGAAGAGTACTTCATGATGCGGCTGACCAACGCCAGCGGCATCTTGGAG  
CCGGAACAGCTGCGCCGCATCGGCGAAGTCGCGAAGGAGTACGCGAAGGGTCCCGTCGAAATCCCGAATTCCG  
GGAATGGGTGGATCGACCTGACGACCCGACAGTCCGTCCAGCTCCACTGGCTCAAACCTCGAGGATATCCCCGA  
GATCTGGGAACAGCTCGAGGCCGTCCGGCTCCACTCCCGCTCGGCGGGCGGTGATACGATGCGCAACATCTCC  
GGCTGCCCCGCTCCACGGCAAGGCCGAGGAGTTCGTGCAAGCCGGTCCCCTGCTCGAGCGCTTCGAGGAGGAGC  
TTCGCAAGGACGACGCGCTCGCGAACATGCCCCGGAAGTCAACATCAGCGCGTCCGGCTGTACGGTCCGGCTG  
CGCACAGGACTCGCTGAACGACATCGGGTTCGAGCCGGCGACCAAGGAGATCGACGTCTCCGGCGGAGCCGGA  
GGCTCGTCCGACTCGTCCGACGGTGGCGAAGAAGTTCGAGGATTCAACGTCCGCATCGGCGGGCGGGCTCGGGC  
GCCGCCAGCCCCGCGCCGCGACGCCGCTCGATATCTTCGTCCGGCCCCAAAACGCCTACGAGGTCGGCCGCGG  
CTTCGTGCAACTCTACCACGACTACGGCAACCCGGCAGAACCCTCGAAGAATCGCGCCCCGGTTCTTCGCCGAG  
GACTGGGGGATGGAGAAGATCCGCGAGACGCTCCAGGAGGAGTACGTGACTTCGAAATGCACACCGCCGGGG  
AGGACTTCCGCGAGGAGTACACCTACAACGCCGGCCGCCCGCTCGAGGACGGTCAGCACGACCACGTCCGTGT  
CGGCGACCAGAAGGACGGACAGAACTACGTCCGCCTGAGCGTTCCCGTCCGGCCGGCTCCCGGCCGAGGACGCC  
ATCGAACTGGCCGATCTGGCCGACGAGTACGGCTCCGGCGAGGTCCGGCTGACCCGCCGCGAACCCTCGTCA  
TCGTGACGTGCGCGACGAGGACCTCGAGGAGCTGCTCGCGGAACCGATCCTCGAGGAGTACCCCGCCGAGCC  
GAGCCCCCTTCGAGCGCGGGGCGATGGCCTGTACCGGCACCCGAGTTCGTCTGATCGCGCTGACCGAGACGAAG  
GGTCGGATGGCCCGCATGCTGCGCTGGTTCAACAAGAACGTGAGCTGCCCGACGACGTCCGCAAGATCAAGA  
TGCCTACTCCGGCTGTACGGCCGACTGCGGCCAAGCGATGACCGCCGACATCGGCCCTGCAGGGCATGCGCGC  
GCGCAAGAACGGTGGATGGTGAAGCCTTCGATATCGGCGTCCGGCGGGCGGTCCGGCGAGGACCCCTCCTTC  
ATCGACTGGATTCAACAGCGCGTGCCTGCCGACGAGGCCCCCGCGCGATCCGGAACCTGCTCGAGGCCTACG  
CGGCTCATCGTAGCGAGGGCCAGGCGTTCGCGGAGTGGGTTCGAGGCGACGGGCGAGGAACAGCTCGTCCGAGTT  
CTGCGAACCCGAGGAGACCGACTTCGAGGCCCGTACATGGACGACGCAAGCAGTCTTGGTACCCCTTCGCC  
GAGAGCGAGTCCGCGGGCGCCGCCCGCGCGAGGGATCCGTGGCCCCGTCCGACGACTGA

>htu:Htur\_0241-Ar nitrite and sulphite reductase 4Fe-4S region; K00366  
ferredoxin-nitrite reductase [EC:1.7.7.1] (N)

GTGGTATCTATGAATACGACGGAACAATACAAACAGAACAAGCACCCGCTCGACGTCATCGACGATGTCTACG  
ACTACGCCGACGAGCAGCTGAGCTTCGAGGAGATCGAGGAGCGCGCCGGCGGGCGAGTGGGAGCGCCTGAA  
GTGGGCCGGCATGTACGCCAGAAGCAGGAGGGTTACTTCATGATCCGGACTAAGGTGCCGGGCGGCAAGCTC  
ACGCCGAACAGGCCGAGGTCATCGGCGAGGTACCCGAGGACTACGCCGTCCGCTCCCGAGGAGTACGGCGGGC  
AAGAGCAGAACGAACTCTGGGGCGACGCCTACCTCGACATCAGCAGCGACAGGACATCCAGAAACTGGAT  
CCGCGTTCGAGGACGTCCCGGAGATGTGGGAACGGTACGATGAGGTCCGCCTGACGACGGTTCAGGGCTGTGGC  
GACTCGGCCCCGAAACGTTCTGGGTTGCCCGCTGCCGGCTCGACGACCACGAGTGTTC AACCGCGCAACCCGG  
TCATCGACGCCGTCTCGGACTACTTCACGAACAACCCGCGAGTACGCCAACCTCCCGCGAAAGTTC AAGATCAC  
GATCACCGGCTGCGCCCACGACTGCGCGCAGTCCAGATCAACGACGTCCGTCTCGTCCCGCGAAGAAGGAG  
GTAGACGGCGAGTACCTCTACGGTTCCACGCCCGCGTCCGGCGGGCCCTCTCCGACGGCCCGCGGATGGGCT  
CGGAGCTCGACGTCTTCATCCGACCCGAGGACGCCGTGGAGTTCGTCCCGCGCCGTCCGCCAGACGTTCAAGGA  
GCTCCGGCACC GCAACAACCCGCGGCGTCTGCCGCATGCGCTACCTCGTTCGAGCAGATGGGCCCCGAGAAGTTC  
GAGGAGGCCGTCCCGCACCCTGTACGATCGACCTACCCACCGGCGGGCGAGA ACTTGACCGTCCGGTACCAGG  
GCGACCACGTCCGGCTCCACGAGCAGAAGCAGGACGGACTCAACTACGTCCGGTTC AACGTGATCGCCGGCCG  
CATGGGCGGGCAGAGTTCGCGGAGGCCGCCCGCGCCGCCGAGAAGTACGGGACCGAGGACGCCTCCGTGCGT  
CTGGCGACCGATCAGAACTTCCTGATCACTCACATCCCCGACGAGAACGTTCGACGACCTGCTGGCGGAGCCGT  
TCGCCCCGGGAGTACAGTCCCGATCCGGGGCCGTTCTCCCGCGGCGCGGTCCGGCTGTACGGGCAACGAGTTCTG  
TAACTACGCCATCATTGAGACGAAAAGCGAACCAAGCGGTGGGCCCGCGAGCTCGACGAGCGCATCGACGTC  
CCCGACGACATCGAGGCCATCCGGATGCACATGTCCGGCTGCTCGGCCTCCTGTGCCAGCCCCAGATCGCCG  
ACATCGGCTTCCGCGGGCAGACGGTCAAACCTCGAGGACGAGAACAGCACCAACGCCGAGGGCGACAACATCGT  
CGAAGGCATGGACTTCGGACTCGGCGGCTCGCTCGGCGCCGACAACGAGTTCCTCGACTGGGTTCGAGAACGCC  
GTGCCCGCCCAGTCCGTGATTCGGGCGCTCGAGCAGCTGTTCGAGGCCTACAGCGAGGGCCGCGACGACGGCG  
AGAAGTTCACGAGTGGACCCCGCGCATCGACAACGAGCGCTCCGACAGATCATGCAAGGGGCGGACGCGCC  
GTTGACAGGAGTGTGCCATGGGGACTAA

>htu:Htur\_2855-Ar nitrite and sulphite reductase 4Fe-4S region; K00366  
ferredoxin-nitrite reductase [EC:1.7.7.1] (N)

ATGGCAAGTGATGTCGAGCAGTGAAGGACGAACTCTACGGAACCGATATTCGCGACCAGATCGAATTCTTCG  
CCGAGGAGGGATGGGAGTCCATCCCCGACGACGAACACGACGCCTGGTTCGAGCGGTTCAAGTGGTACGGCCT  
GTACCACCAGCGAGCCGGCCAGGAATCGTATTTTCATGATGCGAATCGGTCCACCGGGGGCGTCTCGAACC  
GGCCAGTTTTCGACGCATCGTCGAAATCGCGGACGAGTTCTCCCGCGTCCCGTCGAAAAATCCCGAGTTCGGCA  
ACGGCTGGCTCGACGTAACGACTCGTCAAGCGATCCAGCTCCACTGGATCCGCCTCGAGGACGTGCCCGAGAT  
CTTCGAGCAACTCGAGGACGTGGTCTCTCGACGGTCCAGGCCTGTGGTACTCCTGGCGAAACATCGTCGGC  
TGTCCGGTCCCGGCAAGGACAAACACGAGCACGTGACGCGGACTGGCTCGCAACCGAGCTTACGACACGT  
TCAAAGAGAACGAGGCGCACTCGAACCTGCCGCGGAAGTGAAGGTCTCGGTGACCGGTGTGACGAGGGCTG  
CGGACAGGGCGACATCAACGACCTCGCGTTCGAGCCCGCCGAGAAGGAGATCGACGGGGAGAGCGTGACGGGC  
TACAACGTTTCGCGTCCGGCGCGGTCTCTCGCGCAACGAGCCGCGTTCGCGCGCAACATCGACGTCTTCGCAA  
CGCCCAGCAGGCCGTCGAGGTCGCGGGCGGGCTCTCCGCGTGTTCGCGACCACGGCGACCGCGAGGACCG  
CTACAACGCGCGCATCAAGTTCCTCGTCGACGAGTGGGGCCCCGACAAGTCCGCGAAACGCTGCAGGAGGAG  
TACGTCGACTTCGAGCTCGAGACCGCGGGCGAGGACCTCCGCGAGTCGTAACGCGGGCGAGGCCG  
ACGGCAAACACGACCACGTCCGGCTTACGAGCAGGTTGGCGGGGACTACTACGTCGGACTGAACGTCCTCGT  
CGGTGCAATCGGGCTCGACGACGGCTACGCGATCGCCGACGCGGCAGAGGAACACGGCTCGGGCGAGGTACGA  
CTACCCAGCGTCAGAACATCATCCTCACCGACGTGGACGAGGCAAACGTGGACGACCTGCGCGCCGAGCCCC  
TCCTCGAGGAGTACAGTCCCAATCCCCACCCGTTCCAGCGCGGTTTCGATCGCCTGTACCGGCACCGAGTTCG  
TTCGCTCTCGATCGTCGAGACGAAGAACCGGCAGGTTTCGTTTCGCCCCGCTGGCTCAAAGCGAACGTGAGCTT  
CCGGAGGGCGTCGAGGACTTCCACATCCACCTCTCCGGCTGTACCGCGTCTGTCGCCCCAGCCCCAGATCGCCG  
ACGTCTCCCTGCGCGGGATGAAGACGCGCAAGAACGGCGAACCCGTCGAGGCGCTCGACATCGGCCTCGGGGG  
CGGTCTCGGCGAGGAGCCCCAGTTCGCCTCGTGGGTACCGAGCGGTCGCCCGCGACGAGGTCCCCGGCGCG  
ATCGCGAACCTGCTCGAGAATTCGCCGAGGCCCGCGAGAGCGAGGCACAGAGCTTCGGGAGTTCGTCGCCG  
ACCGCGACGACGAGGAGCTCGCCGAACCTCGTCGAGCCCGAGGAGACCAGCTACGACGACCCGTACATGCACAA  
CACGAAGCGCACCTGGTACCCCTACGCCGAGGACGACGACCTCGACTCGAGTCCCCTCCGCGCGGGCCGAC  
GGCAGCCGATCACCTCGGACGACTAA

>htu:Htur\_3039-Ar nitrite and sulphite reductase 4Fe-4S region; K00366  
ferredoxin-nitrite reductase [EC:1.7.7.1] (N)

GTGAGCGACGCACCGCACGTCGTCTCCTCGTCGTGGCTCGAGGCCACCGCGAGTCCGGTGACGGTTCGTCGACG  
TCCGCGAGGAGCGGATTACGAGCAACTGGGACGGATTCCGGGGCGGGTCAACGTCCCGACCAAGGCGTTCCG  
TGATCCGAGCAGTGTGCGCCGAGGGGAAACTGCCCGGGCGGGCGGCCTTCGCCGATTGCATGAGCGAGGCAGGG  
ATCGAGCGCGGGGATTCCGTCGTGCGCGTTCGATGACGAACGCGGGCTCAACGCGGGCCCGGTTCTGCTCACCG  
CGACCGTCTACGGTACGAGGGGGACCTCTACCTGCTCGACGGTGGTCTCGAGGCGTGGCTCGAGGAGATCGA  
GGCCGACCTCGAGACGGCTGCACCGGGGACGGAGTCGACGCGGACCCCTGACGGCGTACGAGGCCGCCAGACGC  
GACGACGCCCCGATCGTCGACCGCGAGGGCGTCGAAGCGGGCCGTCGAGGGCGACGCCGTTGTGGTTGACACCC  
GAACGGCCCGCGAGTACGATCAGTCGCACATCCCTGGCGCAGTGAACCTCGGTTGGGAGGCCCTGCTCGAGGA  
CGAGACCGGCCGACTGAAGCCCGAGGACGAACCTCGAGTCGCTGCTCGCCGACCGGGGGATCGTCCGGATGAT  
CGGATCGTCTCTACTGTAACACCGCGCGGGCGGTTGAGCCACACCTACGTCGTCTGCGGCACCTCGGCTACG  
AGAACGTGCGGTTCTACGAGGGGAGCCTGACCGACTGGGTCCGCGCGGAGGCCCCCGAGTGGGATCCCGTTCGA  
CTCAAGCGGCAGGTCCGCGCTACGCCGACGCGGGCGGGTTCGACGCGATGGTTCGCGGAACTCGGCGAGGAC  
GTCTCAACCGGTTGAAGCTGATCGGCCTTACCACCAGAAACAGCGGGGCTACTTTCATGCTCCGCACGCGAG  
CGCCCGGGCGAATCCTCACCGCCGAGCAGGCCCGCGTTCATCGGCGAGGTGGCCGACGAGTTCGCCCGGGCGCC  
CGAGGCGTACGGCGGGCCCCGACCAGAACCCCGTCTTCGGCGACGGCTACCTCGACGCGACCACGCGACAGGAC  
ATCCAGATGCACTGGATTTCGGATCGAGGATATCGCTGAGATCTGGGACCGGTACGACGAGGTTGGCCTCGAGA  
CGATGACAGGCTGTGGCAACTCGGTTTCGCAACGTTCGTCGGCTGTCCCGCCGCGGGGATCGACGCCGACGAGAC  
GATCGACGTCCGGCCGACCGTTCGAGCGCGTCAGCGAGCGGTTCTTCGCGGACACCCCTACGCCAACCTGCCG  
CGGAAGTTCAAGGTGAGCATCACGGGCTGTACGAGGACTGCGCCCGATCGGGGATTCAGGATCTGGGGCTGA  
CGCCGGCCGTCAGGACGGCCGCGACGGCTTCGTCGCGGGTTCGGCGGGGGCCTCTCGGACGGCCCGCGGGT  
CGTAGCGATATCGACCTCTTCGTCGAACAGAGCAAGTCGACGACCTCGTCGCTGCGATGGCCGACCTCTTC  
ATGGACCGGGGCGAGTACCTCGACACCGCCGTCGAACCGTTCGCGGTTCTTCGTCGAGGAACTCGGCCCGGAGC  
GTTTCAGGGCGGAACTCGAGTCTACGCCGACTTCGCGTTCGAATCACCTGACGAGGCGCTGACGACCGACTA  
CCGGGGCGACACGTCGGCGTCCACGAGCAGGACGACGCGCCGCTCCTACGTGGGGTTGAACGTCCCGACGGGT  
CGAATGGGCGGGCAGGATTCGCGGAACTGGCGCGACTCGCCGACGACCTCGGCGACGGCGAACTTCGGCTGA

CGCCCAACCAGAACGTACTTGTCCCCACCTCGCGGACGACGCGCTCGAGGCGTTTCTCGACGAACCGGTCTG  
CGAACGTTACAGCCCCGATCCCGGGCCGTTACACGCGGGAATCGTCACCTGTACGGGCCGGGAGTTCTGCAAC  
TACGGGATCATCGAGACGAAGAACCGCGGATCAGGTGGGCCCGGAAGTGGACGACTGGGCCGAGGAAGTCCG  
GTATCGCGGACGACCACGACGCGATCCGCGTTACATGTCCGGCTGCTCGGCCTCCTGCGCCAGCCCCAGGT  
CGGCGATTTTCGGCCTGCGCGGCGAGGTCTACCGCGACGACCACGAGTCCGGTTCGCGCGGCCGACCTCGGACTC  
GGCGGGGACCTCGGCGACGACGAATTCATCGACTGGCTCGTCGGGAAGATTCCGATCGACGACGTGCCGGACG  
TGATTCGGGAGACAATGCTCGCGTACGAGAGCGACCGCGGGGGCGGCGAATCGTTTCGCCGACTGGATCGACCG  
GAAGTCCGACGCGGAACGCGCGAAATCGTTACGGAACGACCGAGGACCGACCCGCCCGCCGTCGGCACGGAG  
GTGAGCTGA

>vdi:Vdis\_1436-Ar nitrite and sulphite reductase 4Fe-4S region; K00366  
ferredoxin-nitrite reductase [EC:1.7.7.1] (N)

GTGTCTTCGTTTAAAGTACTCGGACGTTTACAGGATTGTGTATCCAAGGAGGCATGAGGGTATTTATAAGAACC  
GTGGCGATAATCCCTGGGTATCAATAAGGATTAGGCAGGGTGTCCGGTCTGACCCAAGCAAGTGGTTTTTCGAA  
CCAATTAAGGGTTATTGCCGAGGTCAGTAAGGTTTACGGTGTAGGTAGGGCCATGCTCGGCACCAGGGGTGAT  
ATTGAGATCTTCAAGGTCGATTTTCAGACTTTTCGATGAGGTAGTAGCCAAGCTTAAGGAGGTCGGCCTTGACC  
CAAGGGACTCCTGCGGAAACTCTGTTAGGAATCCAATACCGTGCACCTCCCAGTTCTGCCCATATGCCACAT  
AAACGCTGAGGCGTTGTCCACATTCATAGGCGATTACTTTAGGTATAGGAGTGAGTATGAGCAACCCTCGTTA  
CCTCACAGAATTAAGATATCAATTTCCGGCGTGCGAAAGGGCTTGCAGCGGTGCCCGTTGCCAGGACATAGGCA  
TTGTGGCCAAGCCCAATGTAAGTTCGACGTGTACCTGGGCGGTGGAATAGGTGAGCACGCCTTCAGCGCTAA  
ATTAGCCTTTACTGACGTTGATGCGGAGGATTTACTACCAATCTGTGTGGGTGTTGCCGAGGTCTTTAGGAGG  
TCTGGCGAGAGGAGGGGATTCAAGTGGGTGGTTAAGTTACGTGGTCTTGATAAGGTTAAGGAGGAGGTTATGG  
CAATAGCCAGGGAGATCAAACCTAAGCTACCCAAGCCGCCGATTTGACTCCAAGGTTCAATTAAGTCAAGGAT  
TGTGAAGGTCCCATACCCAACCTGGCTGGGTTACCGCTGATGAATTGATTAAGTTGGCTGATGTGGCTGAGAGG  
TATGGGTTTTGGCTACGTACTATTATTTAATAACCAAAGCGTCTACATAACCAATCCGTGAGGGGGTCAATAAGA  
TTGAGGAATTGAACAATTATGAGATTAGGGATCCAGGGCCATATATCCCGAGGGCCCAATAACCGTTGCATG  
CCTAGGGAATGAACATATGCCACCAGGCCTAATAGACACCACCGGGCTCGGCCGTAATAACACGTACACTTA  
AGTAGGCTCAATGAGCCAATTAGGGTCGGCATTAGTGGGTGCACGCATGATTGCGGCATGTCGTGGGTCTCGG  
ACATAGGTTTTGAACCATTTGGTTCTAAGACGAGGATCTTGATAACAATGGGTGGTTACCCGACGGCCCTGGG  
CTTTGTCATTGGCACGGTTGACCCAGGGGATGCGGAGCTCGCGGCGCAGGTTTTACTTGAGATGTATAGGGAG  
TCAGGTGTTTCGTGGGGTTAGGGACTTCGTGACTAAGGTTGGCGTTGATACTATTAGGAGCGAGCTGGTTAAAC  
GTGCGCCTTCCTTTAAACCGCCGGATAAGGACATTAGTATTGTTTTTGGGCCTGACTAG

>vmo:VMUT\_0162-Ar nitrite and sulphite reductase 4Fe-4S region; K00366  
ferredoxin-nitrite reductase [EC:1.7.7.1] (N)

GTGGTTTTATCCGAGGAGGCATGAGGGTATTTATAAGAACCCTGGGTGATAATCCCTGGGTCTCGATAAGGATTA  
GGCAGGGTGTGGTTCGTGACCCAAGTAAGTGGTTTTCAAACCAATTAAGGGTGTGGTTCGAGGTTAGCAAGGC  
GTATAGTGATGGTAGGGCGATGCTTGGAACGAGGGGTGATATTGAGATTTTCAAGGTCGACTTTAGGCTCTTT  
GATGAGGTTGTGACTAGGCTTAAGGAGGCTGGTCTCGATCCCAGGGATTCTGCGGTAACCTCTGTTAGGAATC  
CAATACCATGCACGTTCGAGTTCTGCCCATATGCTCATGTTAATGCTGAGGTTTTGTGACATTCATAGGTGA  
TTACTTTAGGTATAAAAAGTGAGTATGAGCAACCATCGCTTCCGCACAGGATTAAGATATCAATATCAGCATGC  
GAGAGGGCGTGCAGCGGTGCCCGTGGCTCAGGATATTGGTATTGTGGCTAAGTCCAATGGTAAGTTCGACATTT  
ACCTGGGTGGTGGTATTGGTGAGCATGCATTCAGTGCCAAGTTGGCTTTTACTGACGTCGATGCTGAGGATTT  
ACTTCCAATCTGCATGGGCGTGCAGGAGGCTTTTAGGAGGTCGGCGAGAGGAGGGGGTTAAGTGGGTGTT  
AAGTTGCGTGGTCTTGATAAGGCTAAGGAGGAGGATTGGCAATAGCCAGGGAGGTAAAGCCTAAACTACCCA  
AGCCACCTGATCCAACGCCAGGTTCAATTAATCAAGGATTGTAAGATTCCATACCCAACCGGCTGGGTTGC  
CGCCGATGAATTAATTAGGTTGGCCAATGTGGCTGATAGGTATGGGTTTGGCTATGTATTGCTATTCAATAAT  
CAAAGCATATACATAACCAATCCGTGAGGAGGTTGATAGGATTGAGGAATTGAGCAATTACGAGGTCAGGGATC  
CAGGGCCCATGTACCCTGATGGACCAACAACAGTTGCATGCCTAGGTAATGAATTATGCCACCAGGCCTAAT  
AGACACCACCGGGCTCGGCCACAAAATACATATTCACTAAGTAAGTTGAATGAGCCAATTAGGGTTGGAATT  
AGCGGTTGTACCCACGACTGCGGTATGTCGTGGATCGCGGATATAGGCCTTGAACCATTCGGTTCAAAGACGA  
GGATATTAATAACGATGGGTGGTTCACCGACCGCGTTGGGCTTCGTCATCGGCACTGTCGATCCAGGCGATGC  
AGAGCTCGCAGTACAAGTACTTCTTGACATGTATAGGAGGTCGGTGTTCGTGGGGTTAGGAATTCGTGGTC  
AAGGTCGGTGTGATGCCATAAGGAGTGAGTTAACTAGGCTTGTGTCTCCTCGTTCAAGTTCGCCGGATAAGGACA  
TAAACATAGTCTTTGGGCCCGACTGA

>cma:Cmaq\_0290-Ar nitrite and sulfite reductase 4Fe-4S subunit; K00366 ferredoxin-nitrite reductase [EC:1.7.7.1] (N)

GTGTTCAAGTATTCTGATGTACATAAGTTGGTTTACCCAAGGAGGCATGAGGGGGTTTACAAGAATCGTGGTG  
ATAACCCATGGGTCTCGGTGAGGATTAGGCAGAGTATTGGCCGTGACCCAAGTAAGTGGTATTCAAGCCAATT  
AAGGGTTATTGCAGAGGTTAGTAGGAGGTATGGTGTAGGTAATGCTTGGGACCAGGGGTGATGTTGAG  
ATCTTTAAAATCGATTACAGGCTTTTCGATGAAGTTACGGCTAAGCTTAAGGATACTGGACTTGACCCAAGGG  
ACTCCTGCGGCAATAGCATCAGGAATCCAATACCATGCCCCAGTAACCACTGCCCCACTGGCCCACGTGAATGC  
CGAGGCCATTATCAGTATTCATAGGGGATTACTTCAGGTATAAGGGTGAGTATGAGGGGTCGGCATTACCGCAT  
AGGATTAAGATATCGATTCAGCCTGTGAGAGGGCCTGTGCAGTACCTGTGAGCCAGGATGTGGGAATTGTGG  
CTAAGCCTAATGGTAAATTCACATATACTTAGGCGGGGGTATTGGTGAACATGCATTCACAGCTAAATTAGC  
CTTCAGTGACGTGGAACGGAGGATATACTACCGTTAATAGTTGGTGTGGTTGAGGCTTTAAGAGGAGTGGG  
GAGAGGAGGGGTTTTAAATGGTTCATTAAGCTTAATGGATTCGATAAAGTTAAGGAGGAGTATTGGCAGTGG  
CTAGAGAGGTTAAGTCAAAGCTTCCTAAACCACCCGACGTTAAGCCAACATTCATTAACACCAGGGTTATTAA  
GATGCATTACCCAACGGGCTGGGTTACCGCCAGTGAATTAGATGAGTTAGCGCATGCTGCTGATGAGTATGGT  
TTAGGCTACGTAGTGTGTTTAAATAATCAAAGCATCTACATACCATTAGGGATAATGTTAAGGAGATTAGGG  
GAATTAATGGTGAATTAAGGAACCAGGACCATACTACCCAGAGGGCCCAATAACAGTTGCCTGCGTTGGTAG  
TGAACCTGTCCGCCAGGTCTAATAGACACAACGAGCCTAGGCCGTAAAATACACGTACATATCAGTGGATTA  
AAGGAGCATATTAGAGTCGGCATTAGTGGCTGTACCCATGATTGCGGCATGAGCTGGGTCTCAGACATCGGCT  
TCGAGCCTTTTCGGCTTCAAACAAGGATACTGGTCACAATAGGGGGTGCCTCAAGGCAATTAGGCTTTATACT  
AGGCACTATCGACCCAGTGAAGCTGAGTTAACGGCCAAGGTTATATTAAGCATGTATGTGAAGTCTAAGGCA  
CCCAACATAAGGGAGTTTGCGGTGAGGACTGGTATTGACGCCATTAGGGATGAGTTAAGGAGGCAAGTACCAT  
CATTTCAACCACCCAATGATAGTATTACTGCATTATTTGGACCTGATTAA

>hje:HacjB3\_00040-Ar nitrite and sulfite reductase 4Fe-4S subunit; K00366 ferredoxin-nitrite reductase [EC:1.7.7.1] (N)

ATGCCGACCAACGTGGAGGAGTGGAAAGACGAGGTCTACGGCACTGACATCCGTGCCCATATGGAGCGCTTCG  
CCGAGGAGGGCTGGGACCGGATCCCCGAGGACGAACACGACGCCTGGTTCGAGCGCTTCAAGTGGTACGGGCT  
GTACCACCAGCGCGCCGGCCAGGAGAGCTATTTTCATGATGCGGATCGGCCCGCCAAACGGCGTGCTCGAACCC  
GGTCAGTTGCGAGCCATCGGGCAGGTCGCGAAGAAATATTCGACCCGACCCGAGAAAACCCGAGTTTCGGCA  
ACGGCTGGGCCGACTTTACGACCCGCCAAGCCATCCAACCTGCACCTGGATCAACATCGAGGACGTCCCCGCCAT  
CTGGGACGAACTGGAGGAGGCCGGCCTCTCGACGCTGCAGGCCTGTGGGGACTCCTGGCGCAACATCGTTCGGC  
TGTCCGGTTCGCCGGCAAGGACAAGCACGAACACGTGCAGCGCTCGATACCATCCACGAACTCCACGACACCT  
TCAAGGGCGACGACGATCACTCGAACCTCCCCCGCAAGTGGAAGGTTTCCGTTACGGGGTGTGACGAGGGCTG  
TGGACAGGGTGACATCAACGATCTGGGTCTCGAACCCGCCGAGAAGAACGGCGAGACGGGCTTTAACGTCCGC  
GTCGGTGGCGGACTCGCGCGCAACGAGCCCCGCTTCGCCCGCGACATCGACGTCTTCGTACGCCCCGAACAGG  
CCGCCGACGTTCGCCGGCGGCTCTCTCGGCGCTGTTTCGCGACCACGGCGACCGCGAGAACCCTACAACGCCCG  
GATCAAGTTCTTCGTTCGACGAGTGGGGCCCCGAGAAGGTCGCGACGTCTTCAGGAGGAGTACGTTCGACTTC  
GAACTCGAGACCGCGGGCGAGGACCTCCGGGAGAACTACTCCTATAACGCCCGCACCCGCCGACGGCCACGCCG  
ACCACGTTCGGCATCCACGAACGAAACGACGGGAACTACTACGTTCGGACTGAACGTCTTCGTGGGTTCGGATGGG  
CGCGGACGAGGTGATCGAACTCGCCGACATCGCCGACGAATACGGTTCGGGGCAGGCCCCGGATCACCCAGCGC  
CAGAACCTGATCCTCACCGACGTCCCCGAGAAGAACCTCGACGAGCTCCGCTCGGAGCCCCGCTCTCGGAGT  
ACAGCCCCGATCCCCACCCGTTCCAGCGCGGGTTCGATCGCGTGTACCGGCACGGAGTTCTGCTCGCTGTTCGAT  
CGTCGAGACGAAAAACAGGCAAGTGCCTTCTCGCGCTGGCTCGTCGAGAACGTGCAACTCCCCGACGGCATT  
GAGGACTTCCACATCCATCTCTCGGGTGTACGGCCTCCTGTGCCAGCCCCAGATCGCCGACGTCTCGCTGC  
GGGGCATGAAGACCCGCAAGGACGGCGAGCCGGTTGAGGCGCTCGACATCGGGCTGGGCGGTGGCTTGGGCGA  
GAACCCCAACTTCGCCGACTGGGTGGTCCAGCGCGTGCACGACGAAAGTGCCTGGCGCGATCGCGAACCTG  
ATCGAGGGCTTTGCCCGGAGCGCGAGGGCGACGAGACCTTCGCGAGTTCGTTCGTTCGAGCGCGACGAGGAGG  
AACTCGCCGACCTCTGTGAGCCCGAGGAGACCTCCTATACGGATCCGTACATGCACAACACGAAACAGACGTG  
GTACCCCTACGCCGACGAGGACGACATGGACGCCAGCCCCGCGCCGACGTCCGCCGACGACTGA

>hje:HacjB3\_10150-Ar nitrite and sulfite reductase 4Fe-4S subunit; K00366 ferredoxin-nitrite reductase [EC:1.7.7.1] (N)

GTGAACACGGTAGAGGAATGGAAACGGGAGAAACATCCCTCGACGCAGTCGAGGACGTCCACGAGTACGCCG  
CGGCGGGGCTGTGTTTCGACGAGATCGAGGAGCGGGCGGGCGAGGGCGTCTGGGAGCGCATGAAGTGGACCGG  
AATGTACACCCACGGTGCACGCGGGGTATCTGATGATGCGCACGAAGTCCCGGTGGTTCGACTAACCCCC  
GAGCAAGCCGAGGTGATCGGCCAGGTCGCCACGGAGTTCGCGACCCGACCCGAAGAAATACGGCGGCAGCGAGC

AAAACGACCTGTGGGGCGACGCCTTCCTCGACGTCACGACCCGACAGGACGTTCAAACGCATTGGATCGAGAT  
CGAGGACATCCCCGAGATCTGGGAGCGCTACGACGAGGTGGGGCTGACGACGATCCAGGGCTGTGGCGACGGC  
GCGCGAAACGTGCTCGGCTGTCCGGCCGCCGTCTCGACGATCACGAGTGTTTCGACGCCAGCCCGTTATCG  
ACGAGTCTCGACTTTTTACGGGCAATCGCGAATACGCGAACCTGCCCCGGAAGTTCAAGATGACGATCAC  
CGGCTGCAAACACGACTGTGCCAATCGCAGATCAACGACGCCGGCTGGTGCCGGCCCGAAAACGGATCGAC  
GGCGAACCCACTACGGCTTTCACGCCCGCGTCGGCGGCGGCCCTCTCCGATGGCCCGCGCATGGCCTCGAAC  
TCGACGTCTTCGTGCGCCCGGAGGACACAGTCGAGTCTGTCTGTCGTCGCGCCGAGACGTTCAAGGAGCTCGG  
CGACCGGCACAACCGCGGGTCTGTCCGATGCGCTATCTCGTCCAGCAACTCGGCCCGGAGAACTTCGAGGCG  
GCCGTCCGCGATCGGTGTTCGGTCGACTTGCAGCAACGGGGCGAGGGCTCACCGAGGGCTACCGGGGCGATC  
ACGTCCGGCTCCACGACCAGCGAGAGCCCGGATTGAACTACGTCCGGTTCAACGTGATCGCCGGACGAATGGG  
CGGCGAGGAGTTCCCGCAGCCGCCCGCGCCCGCGAGTACGGCACCGAGGAGAGTTCGGTCCGGCTGGCT  
ACGGATCAGAACTTCTCATCACCCATATCCCCGCGGAGAACGTTCGAGGACCTACTCAACGAACCCTTCGCCG  
CCGACTACCAGCCGATCCCGGCCCGTTCCTCGCGGGGGCGGTTCGGCTGCACCGGCAGCGAGTTCGTAACTA  
CGGCATCATCGAGACGAAAAACCGCTCAGGCGGTGGGCACGCGAACTCGACGAGCGCATCGAGACGCCCGAG  
GACCTCGAGGTGGTGCGAATGCACATGAGCGGCTGTTTCGGCCTCGTGTGCCAGCCCCAGATCGCGGACATCG  
GCTTCCCGCGGCGAGACCGTGCAACTGGACACGGATGGCGACGGAGATGCCGACGACATCGTCGAGGGCATGGA  
CTTCGGCCTCGGGGGGAGTCTCGGCACCGACAACCGCTTTCGATTGGGTGGAGACGGCCGTTCTGCCGAT  
GCCGTCAATCCCGCGCTCGAAACGCTTTTTTCGGCGTACGCCGAGGAACCGCGAGGACGGGGAGCGCTTCTACG  
AGTGGACCGCGCAGGTTCGAGAACGACCGCCTGCGGGCGGTGATGCAGGGTGCGGATGCGCCCGTCTCGAAGGG  
GGTGGCCCGGATGACTGA

>hxa:Halxa\_1971-Ar nitrite and sulfite reductase 4Fe-4S region; K00366  
ferredoxin-nitrite reductase [EC:1.7.7.1] (N)

GTGAGCGACGGTCCGACGGTCTCTCCCCGACTGGCTCGAGACGCACCGCGATGACGACGGAGTAGTCGTTCG  
TCGACGTCCGCGAGGCCCGCGACTACGCGGAACTGGGCCACGTTCCGGGCGCGGTTAACGTCCCAACCGAGGT  
GTTCCGCGATCCGAGCAGCGTCCCGCCGAAAACCTCCCGCGGCCGACGACTTCGCTGCCCTCATGCGGGAG  
GCCGGCATCCGCGAGGGCGACGCCGTCTGTCGCCGTGACGACGCCAACGGCGTCAACCGCGCCCGCTTTCTGC  
TCACCGCGATCGTCTACGGCCACGACGGCCCGCTGTACCTACTCGACGGCGGCCTCGAGGCCTGGCTCGAGGC  
GGGCGGCAACCTCTCGGACGAGGACCCCGACCCCGAGCCGACGAACTACGAAGCCGAACGGGACGCCGGCGCG  
CCGCTGGTTCGACCGCGCTGGCGTTCGAGGAAGCGGTTCGAGGGCGACGCGGTTCGTCGTCGACACCCGGACGGCCG  
CCGAGTACGACCAGTCTCACATCCCGGCGCGGTGCAACTGGGCTGGGAGGACCTGCTCGAGGAGTCGGGGCG  
GCTGAAACCCGAGGCCGAACTCGAGGAACTGTTGGCCGACCGCGGCATCACCCGCGACGAGCGGATCGTCCTC  
TACTGTAACACTGCACGGCGACTCAGCCACACCTTCGTCTCCTCCGAGACCTCGGCTACGAGAAGTCGAGT  
TCTACGAGGGCAGTCTGACGGATTGGGTCCGCGCCGAGGCACCCGAATGGGACCCCGTCAACTCAAGGAGCA  
AGTGCGGGCTACTCGAGGGGGCGGCGGCTTCGAGGGCATGGTTCGAGGAGTTGGGGCGACGACGTGCTCAATCGG  
CTGAAGCTCATCGGGCTCTACCACCAGAAGCAGCGGGGCTACTTCATGCTCCGGACCCCGCGCCCCGGGCGGGA  
TCCTCACCGCCGAGCAGGCCCGGACGATCGGCGAGGTTCGCCGACGAGTTCGCCCGCGCCCCGACGAGTACGG  
CGGCGCCGATCAGAACCCCGTCTTCGGCGACGGCTTCTCGACGCGACACCCGGCAAGACATTCAGATGCAC  
TGGATCGAGATCGAGGACGTCGCCGAAATCTGGGACCGCTACGACGCGGTTCGGCCTCGAGACCATGCAGGCCT  
GCGGCAACTCGGTGCGCAACGTCGTTCGGCTGCCCGCCTCGGGGATCGACCCGGACGAGACCGTTCGACGTCCA  
GCCGGTTCGTCGAGCGGGTTCAGCCAGCGGTTCTCGGTGACCACACTACGCGAACCTCCCGCGGAAGTTCAAG  
GTCAGCGTCACTGGCTGTACGAGAATGCGCCCCGCGCGCAGATCCAGGACCTCGGGCTGACGCCCGCCCGGA  
AGGACGGCCGCGAGGGGTTTCGTCGCGCAGGTTCGGCGGGCCCTCTCGGACGGCCCGCGGATCGCTAGCGACAT  
CGACCTGTTTCGTCGACCCCGAGGACGTCGACGATCTCGTCGCCGCGATGGCCGACCTGTTTCATGGACCACGGT  
AGCTACCTCGATACGGCCGTCACCCGGCTTCGTTTCTCGTTCGAAGAATTGGGGCCCCGAAACGTTCCCGGAGG  
AACTCGAGACCTACGCCGATTTACGTTTCGAATCTGCCGCGGATGCCGAGCGCCTGACGACCGACTACCGCGG  
CGACCAGTTCGGGGTCCACGAGCAGGCCGACGGCCGCTCTACGTTCGGTTGAACGTCCCGACCGGGCGGATG  
GGTGGCGACGACCTCGCGGAACTGGCCGCTCTCGCCGACGAGTTGGGCGGGCGGCAACTGCGACTGACGCCCA  
ACCAGAACGTCCTCGTTCCCCACCTCGGGGACGATGACCTCGAGCGGTTCTCGAGCACCCGCTGCTCGAGCG  
GTACAGCCCCGATCCGGGCCCGTTCACGCGCGGGATCGTCACCTGCACGGGCGGGGAGTTCTGCAACTACGGG  
ATCATCGAGACGAAGAATCGCGCGGTCAAGTGGGCTCGCCAGTTGGACGAGTGGGCCGAAGAAGTCGGCATCG  
CGGACGACCACGACGCGATTCGAGTCCACATGTCCGGCTGCGCGGCCCTCTGTGCCAGCCCCAGTTGGGCGA  
CTTCGGACTGCGCGGGGAGGTCTACCGCGACGACTTCGAGTCCGGTTCGCGCAGCGGACATGGGGCTGGGCGGC  
GATCTCGGCGACGACCAGTTCATCGACTGGCTCGTCGGCAAGATCCCGATCGAGGACGTGCCGAGCGTTCATCG  
AGGCGACGGTGCAGGCCTACGAGGACGACCGCGAGCCCGACGAGTCTTTGCCGAGTGGACAAACCGCACGTC

GAACGCGGACCTGCGCGAGATCATCGCCGAACAGCCGGCGCGGATCCGCCGGCGATCGGGACGGAGGTGAGC  
TGA

>mse:Msed\_0880-Ar nitrite and sulfite reductase 4Fe-4S region; K00366  
ferredoxin-nitrite reductase [EC:1.7.7.1] (N)

ATGAAATATAGTGAGAAATTTAAATCACTCTACCCAGAAAGATTTAAGGGAATTTATTCAAGCAGAGGAGATA  
ACGATCTTATCTCCATAAGGATAAGGCAAGGAAAAGAACGGGATCCCTCTAGATGGTGGTACCAGCAACTAGA  
GGTCTTAGCCAATATATCTAAGAAAGGAGATGGAAGAGTTCATTTTACAACAAGGGGAGATGTAGAACTTTAC  
GGAATTCAGCTATCTGATAAGGAGAAGGTGCTGAGAGAGCTTGAGAGTGTTCGAGTTGGATCCAAGGGATTCCCT  
GTGGGGCATCGGTTAGAAACGTCCTTCCATGTCCATCTTACATTTGCCCTTTGCTAAGACAGATGCAATTA  
GGCCTCCCTTGAGATAGCTTCCCTTCTCAGACATAATCCAGAGTACGAATTTCCCAAACCTCCAAAAGGGTA  
AAGATCTCTGTCTCGGCATGTGAAAAGGGATGTTCCGGTCCCCTAATAATGGATGTGGGAATTGTAGCCAGAG  
GTGAAGATCTCTTCGACGTGTGGGTGGGTGGGGGAATTGGAGACCATGATTTTCAGGGCATCAAGCTATTTGA  
GGGAGTTACGCTCGCTGACGCCAAGAGGATCTCCATAGCGGTTACCAACATCTGAAGCGAGAGAATGAGAAA  
AGGGGATTCAAGTGGGTAGTGCAAAAATACGGTTCGGAAAGGGTAAAGGAAATGATCCTGAATGAAATTGAAA  
AGATTCAGATAGAGCGGATTAAGGGCATAACCATCCTCACACCTCAACGCAAAGTTAATGGTTGTTAGA  
GGGTGGTTGGCTGAATTGGGAGGAAGTCAAGAAGTTGCCAAGATTGCAAGGGAGA  
ACTTAGGTTTTGTCTCG  
CTCTTTAATTCGCAGGCGATATTCATTCCTGTTCAGGGAGTTACCTAAAGGTGCAGAGTCCGTTGAATATCCTT  
ACCTTAAAAATGTTGTCGAGGCATGCATTGGAGATGATTATTGCCCTCCTGCAATAATTTCTACTACAAAAAT  
GGCCGAGGATCTGTTAAAAACTGCCTCAGACAGTAAAAATGCGTATTCATATCTCCGGCTGTTCCCACTCGTGT  
GGAAGGCATCAGGTTGCGGATTTAGGATTCAGAGCAGTTATGAGAAACGGGAAAAGAGCTCTGAAAATATATG  
TAAATGGCAATAATTATAGCATAGGAAAAGTGGTAGGTGAAGTCGACTACGAGGATTACCTTCTAGTTGTGGA  
CAAGTTAAAGGGGATAGACTTAGAAAATATTGAAGAAATAAGGAGAAAATTAATGAAAATCCTTCCCTTAA  
GCTGGTGGTCAGAGTGAGGAATAG

>hla:Hlac\_0864-Ar nitrite and sulfite reductase 4Fe-4S domain-containing  
protein (EC:1.7.7.1); K00366 ferredoxin-nitrite reductase [EC:1.7.7.1]  
(N)

ATGCCAACGGACGTCGAGAACTGGAATCGGAGGCGTACGGGCGAGAGGTCCGCGACCGCTTGTTCGAGTTCCG  
CCGAGGAGGGGTACGACTCGATCCCGGACGACGAGCGGGACGCGTGGTTCGAGCGGTTCAAATGGTGGGGCCT  
GTACCACCAGCGGAACGGACAGGAGGGGTACTTTATGATGCGGATCGGGACCCCGAACGGCGTGTCTCGAACCG  
GGACAGCTCCGAACTATCGGGCGAGATCGCCGACGAGTACGCTCGCGGTCCC  
GGGACGAACCCGATCTTCGGCG  
ACGCGTACGCCGACTTCACCACTCGACAGTTCGATCCAGCTCCACTGGATCGAACTCTCGGACGTGCCGGCGAT  
CTTCGAGAAGCTCGCCGCGAACGGCCTCTCGACGCAGCAGGCGTGTGGCGACTCGTGGCGGAACATCGTCCGG  
AACCCGGTCCCGGCAAGGACGGACAGGAGGTCTGTCGAGGCGTGGCCGGTGATCCCGGACCTTAACCAGACGT  
TCAAGGAAAACGACGACCACGCGAACCTCCCCCGAAAGTGGAAAGTGTCCGTGACCCGGTCCGCGGACGGCTC  
CGGGCAGGGCGACATCAACGACCTCGCGTTCGAGCCCGGTACAAGTCGATCGACGGAGACGGAGAGGGCGAC  
GAGAGCGAGGACGAGTCCGGCTTCAACGTCCGCGTCCGGCGGGGCTCGCGCGCAACGAGCCGCGGCTCGCCC  
GCGACATCGACGTCTGGGTGCCACCGGAGCAAGTATCAGATGTCGCCGGCGGGCTCTCCGCGTGTTCGCGGA  
CTACGGCGACCGCGAGGACCGGTACAACGCGCGGGTGAAGTTCCCTCGTTCGACGAGTGGGGCGCAGACAAAGTT  
CGCGAGACGCTTACGAGGAGTACGTCGACTTCGAGCTCGAACCCGCGGGCGCGACGTTTCGCGAGGAGTACA  
CTACAACGCGCGGCGAGGGCGAGCGCAACGACCTGATCGGCGTCCACGACCGAATGACGGCCGGA  
ACTTCGT  
CGGGCTGAACGTGCTCGTTCGACGAGTGGGTGCTGACGACGTGCTCAACCTCGCCGACCTCGCCGAGGAGTAC  
GGTCCCGGCGAGGTCCGGCTCTCGCAGCGCCAGAACGTCAATCGTACCGACGTGCCGGACGACGCCCTTGACG  
ACTTCCCGGACGAGCCGCTGCTCGACCACTACTCGCCC  
GACCCCTCCCGTTTTCATGCGCGGCTCGGTTCGCGT  
TACCGGTACGGAGTTCTGCTCGTGTTCGATCGTTCGAGACGAAGAACC  
GGCAGGTCCGGTTCGCCCCTGGCTG  
AAGGTCAACGTGACCTCCCCCGGACGTGACGAGTTCACATCCACCTCTCGGGGTGTACCGCGTCTGCG  
CGCAGCCGACGATCGCCGACGTGAGCCTGCGCGGGATGAAGACCCGCAAGGACGGGGACCCGGTGGAGGCGCT  
CGACGTGGGCCTCGGGCGGGGCTCGGCGAGAACCCGAGTTCGCCC  
GGTGGGTACCCAGCGCGTCCCGCT  
GACGAGGTTCCGGGCGGATCGCGAACCTGATCGATAGCTTCGCGGCCGAGCGCGACGAGGGCGAGTCTGTTCC  
GGGCGTTCGTCGCCCGTCAACGACGACGAGCTAGACGCTTCGTCGAGCCCGAGGAGACCGACTACGAGGA  
CCCGATGATGCACAACACGAAGCGCACCTGGTACCCGTACGCCGAGAACGATACGATGGAGGACGCGCCCGCG  
ACGCCGGCGGACGACTGA

>fpl:Ferp\_2220-Ar nitrite and sulfite reductase 4Fe-4S domain-containing  
protein; K00366 ferredoxin-nitrite reductase [EC:1.7.7.1] (N)

ATGATGGAGATCAAAATTGAGCTTGGCGAAATTGGGAAATTTATAGGTAAGTACTCCTTGGGCAGAGACAACG  
GAAATGGATCATTGCACTTCTCAGGATAAAAAATTCGGCTGGGCAAATTACGAGCGACAAACTTAGAGAGAT  
AGCGAAGCTTTTCGAGAAAAGTACGGAAGAGGCTACGCTGAAATAACCGACAGGCAGGATATTCAGCTCCACTGG  
ATAGACAGCGAAAAAGCTTTGGAATTTTTGAAGAGCTGTACAGTCTCGGCTACACGACCGATCTCTGCGGGC  
AGGGATTTCAGCGGAGCTTGCTATGGTGACGTAAGAAATATAGTTTCTTGCCCTCTAAGCGGAAAAATTTCCGA  
TTTCGACGTTGCAAAGCACGCAAAGAGCTTACGGAATTTCTTCGGGAAATCCAGAGTTTCATAGATCTTCCG  
AGGAAGTTCAAGATCGCTTTCACCGGATGCGGAGGAGATTGCGTAAGGCTCGGAATAAACGATCTCGGAATGT  
ACGGAGTCGAGCTCGACGGGAGAAGAGGTTTTCGTTCCCTTCGTAGGAGGAAGCATAGGGGCAAGCCATCCCGG  
ACCCACTCTCGCTAAAAATCTCGGTGTTTTCGTTCCGGAAGAGAAAGTTTTTCGAGTTCGTTAAGGCTGTTGTG  
GAAATTCACAGAGACCATTCGAGCAGAGAGAGCAAAGCGAAAGCGAGATTCAAAAATCTCGTAAATTTTGGG  
GGATCGAGAAGCTTAGAAGCGTGATAGAGGAAAAAATTTGGGAAGCTTGAAAGAGTTGAGGGAATTGAGTTGAG  
ACATGCTGATCACAAACGGAAGCGGCGAGCAGGTTAACGGCTTGTACTATTACACTCTGCCTATTATAGGCGGA  
GTTCTCAACGCTGAAAAGCTTGAATTCATAGCCGACATGGCTGACAAGCACGGAGAAGGAGAGGTAAGGCTAA  
CTCCTCAGCAGAACGTTACGTTTGTGGATGTTAAGGATGTCGAAAAGTTGAGGAGGGATCTTGAGAAGACGTT  
CGAGATAAGAGAAGGACAAGTATACTACAACCTCCATAGCCTGTGCCTCGAACTTCTGCGGGAAAACGAGGGAT  
GTTACGCGCAAGGATCTTTTGAAGAAATTTGATAGAAGTTTGCGAAAGGAAGGGAGTGAAGGATATCAGAATAA  
ACGTCCTCCGGCTGCCACAACGACTGCGGCTGCGTTAACGTTGCCGAATTCGGATTTATTGCGAGAATGGTAAG  
AAAGAACGGAAGAGTCGTTCAAGGTTACGACATCTACATCGGCGGAGATTTTGCGAAGCTGAAAATGTGCAAG  
CCTTATAAGACTGGCTTGACAGCTGAAGAGGTTATTGAGGAGTTCGAAAAGCTAATATCGAGGTGA

>hut:Huta\_0176-Ar nitrite and sulfite reductase 4Fe-4S domain-containing  
protein; K00366 ferredoxin-nitrite reductase [EC:1.7.7.1] (N)

ATGAGTGTATCGAATTCATCCCGCCGGCTGCGCTCGGCGACCGAGACGCGGCGATCGTTCGACGTCCGCGAGG  
CGGCGGCGTACACCGACCTCGGTACGTCGCCGGGCGCAGCCAATATCCAGTCGATCGGTTCCGGGACCCGAC  
CGGGATCGCAAGGGGGATGCTGCCCGATCCGACGGACCTGGCAACGTGGCTCGGTGAGGCGGAATCAGCCCC  
ACCGATCCAGTGATCGCCTACGACGACGACTGTGGCGTCTACGCCGCTCGCTTCTGCGGACGCTTGCGGCGT  
TCGGTCACGATGGCGACCTGTATCTCCTGGACGGGGACTACAGCGTCTACGAACGCGAGGCAGACGTCACGGT  
CGAACAGCCGGACGTTCGAGCCTGTGCAATACGAACCGGACGACCTCGACGAGACTCTTCTCGCCGACCCGCGAG  
GACGTCGAGGCGGCGAGTCGACGGCGAGGCGATCGTTCGTCGACACCCGGACCGAACC GGAGTTTCGAGCAGGCC  
ACATTCGCCGGGGCCGTCCAGCTCGACTGGAAGGTTTTTCGTCGACGACGAGACCCGGACGACGACGGAGCGTCGA  
AGCGATCGGGTCAACCCCTCGCTGAACACGGCCTCGAACCCGATCGACCGGTCTCCTCTACTGTAACACGGCT  
CGCCGACTGAGTTACGTTTTCGCGTACTCGAAGACCTCGGGTACGGGGACGTCAGGTTCTACGAGGGGAGCC  
TCGAAGACTGGCTTCGCACCGAGACCGACGACTGGGACCCCGCCGAGATCAAGCGCCGCGTCCGCGAACACGC  
CAACCAGGGACCGAGCGGCGGTCAAAGAAGCCCTCGGGGAGGACGCCGCGGCGAAGCTCAAGCTGGTCGGCCTC  
TACGGGCAGAAGCAAAGCGGCTATTTTCATGTTCCGGACGAAGATTCGGGGCGGTGTCTTGACAGCCGACGCGG  
CCAGGGCGCTCGGGACCGTCGCCGAGGAGTACGCCACGCTGCCCGAAGAGCGCGACCCCAAAGGTCGCCGTT  
CGGTGACGGGTACCTCGACGTGACTACCCGTCAGGACGTGCAGTTCCACTGGATCCGAATGGCGGACGTTCCC  
GAGATCTGGGAGCTGCTGGATCCGGCCGGCGTCTCGACGTTCCAGACCGGCGGCAACTCCGTCCGGAACGTCG  
TCTCGTGTCCGGCAGCGGGCGTCCGCCGACGACGAGGTGCTCGACGCCCGCCGGTCCGCCGAGGCGATCACC GA  
GGCGTTTTCTGGCCGACCGCCGGTACGCCAACCTGCCCGGAAGCTGAAGGTTAGCGTCAACGGCTGTGCGGGG  
GCCTGTGCCAGCCGGAGATCAACGACCTCGGATTCACCCCGCGCGAAGGGCGATCGGGTGGGCTTCAACC  
TCGCCCGCGGGGGCGGCTCTCGGACAGCCCCCGCTCGCCAGCGACCTCGATGTCTTCGTGCAACGGGACCA  
GGTCGTGGACGTGGTTCGAGCCACGGCGGACCTGTTTCATCGAACACGGGAGTTATCTCGACACGGCAGTCAAT  
CGCTGCGCTTTCTCGTCGAGGAGTGGGGGGCCGAACAGTTCCGCGAGGAACTACAGCGCTTTGCCCCCTTCG  
AGTTGCAATCTGCCGGTGAGGACCTTGTACGCATCACCAACCCGACCACGTCCGGCTCCACGAGCAGGCCGA  
CGGAGACAATTACGTCGGCCTCTCGATCCCGGTTCGGCCGATCGACGGCACGGACTTCCGGGGGATGGCCGAT  
CTCGCGGAATCCTACGGGAACGGCGAGATTCGATTGACCACCCAGCAGAACCTCCTGCTTCCGGACGTTGCCG  
ATGGGGATCTCGACGACCTGCGGGCCGAACCGTTGCTCGACGAATACTCCCCGATCCCGGGCCGTTACACAG  
CGGCGTGTACCTGCACCGGTTCGGGAGTTCTGTAATTACGCCCTTGTGAAACAAAAGCCCGCGCGAAACGC  
TGGGCCCGCGAACTCGACGAGCGGGTCGACATCGATCAGGATCGGGTTCGGGCTGCGCTTCAGCGGGTGTACCG  
CTTCTGCGCCAGCCACAGATCGACGACATCGGCCTGCGTGGGAAACTCGCCAGACCGACGACGGAGTGGGA  
GAGTGTGTGACATCGCCGTCGGCGGCAAACCTCAATGTCGATCCACAGTTCGCGACCTGGATCGCACCACGC  
GTCCCCATCGAGTCCGCCCCGATGCGATCGAGCGACTGGTTCGGGTCTTCGAACGCGAAGGGCGCGATTGTG  
AGCAACTCCACGAGTTATGTCGACTGGCGGACGATGATCGACTCGCGGAGGTAATGCATCCAGCAGCAATAGA  
TCCTGTGCAAGCCGCTGCAAACGGAGGCCGAACCGATGCCGACTGA



>hut:Huta\_1327-Ar nitrite and sulfite reductase 4Fe-4S domain-containing protein; K00366 ferredoxin-nitrite reductase [EC:1.7.7.1] (N)

ATGAATACAGTCTGAACAGTGGAAACAGGAGAAACACCCCTCGACGTGATCGAGGACGTCACGGAATACGCAG  
AGGATGGCCTCTCCTTTTCCGAGATCGAGGATCGGGCGGGCGACGGCGAGTGGGAGCGCCTGAAGTGGGCCGG  
GCTGTACGCCACGGTGAGCACGACGATTTCTTCATGAAACGGACGAAGGTGCCCCGGGGTACCTCACGCCC  
GAGCAGGCCGAGGTGATCGGCGAGGTGGCCGAGGAATACGCCACCGCTCCAGCCGAACACGGTGGCGAGGACC  
AGAACGAAATCTGGGGCGACGCGTATCTCGACATCACGACGCGTCAGGACATCCAGATGCACTGGATCGAGGT  
CGAGGACGTCCCCGAGATCTGGGCGACCTACGACGAGGTGCGCCTGACGACGGTCCAGGGGTGTGGCGACTCC  
GCGCGAACGTCTGGGGTGTCCGGCCGCCGGCCTGGACGGCCACGAGTGCTTCGACGCCAGCCCGTGATCG  
ATGCCGTCAACGAGTTCTTCACGGAGAACCAGGAGTACGCCAACCTGCCCGGAAGTTCAAGATGACGATCAC  
CGGCTGTGCCACGATTGTGGCCAGTCCAGATCAACGACGTCGGGCTGACGCCGGCCCGGAAGGAAGTGGAC  
GTCTCCGGCGAAGCCGGAGGCTCGTCGGACTCGTCCGACGGTGGGAAGGACATCTACGGCTTCCACTGCAAGG  
TCGGCGGGGGCTCTCCGATGGCCCGGATGGCCACGCAGATGGATGTCTTTGTTCCACCCGAAGACGCTGT  
CGAGTTCTGTCTGTCATCGCCAGACGTTCAAGGAGCTGGGCGATCGGTTCGAATCGCGGCGTCTGCCGGATG  
CGCTACCTTGTTCGAGCAGCTCGGCACCGAGGAGTTTCGAGGCTGCGGTCCGACGGCGCTGTAGCGTGCATCTCC  
CGGAGAGCGGCGTTCGACCTCACGAGGGCTACGCCGGCGATCACGTGCGCGTCCACGACCAGAAACAGGACGG  
CCTGAAGTACGTTCGGCTTCAACGTGATCGCGGGCCGGATGAGCGGCGAGGAGTTTCGTCGAGGCCGCCCGCGCG  
GCGAAGAAATACGGCACCGACGACGCGCTCGATCCGGCTGGCGACCGACAGAACTTCTGATCACGCACATTC  
CGGCCGAGAACGTTCGGCGACCTCATGGCCGAACCGTTTCGCCCGGAAGTACAGCCCCGATCCCGGGCCCTTCTC  
TCGGGGCGCGGTTCGGCTGTACCGGCTCGGAGTTCTGCAACTACGGCATCATCGAGACGAAGAATCGGGTCTAC  
CGGTGGGCGAAGGCCCTCGACCGCCGCATCGAGACGCCGACGATCTGGATGTCTCGTCCGGATGCACATGTCCG  
GCTGTTTCGGCCTCCTGCGCCAGCCACAGATCGCCGACATCGGGTTCCGCGGGGAGACGGTGAAGGTGCACGA  
TCCCGAGGACTCGACGAATTCGAGGGCGACGCCATCGTCGAGGGGATGGACTTCGGCTGGGCGGCGCGCTC  
GGGACCGACAACGAGTTCTCGATTGGGTTCGAGACCGCGGTGCCCGCCCGGGCGGTGATTCCCGCCCTGGAGG  
AACTGTTTCGCGGCTACACCGAGGAGCGCAACGAGGGCGAACGGTTCTACGCGTGGTGTGCGCGTGTGAGAA  
CGACCGCCTGCGATCGATCATGCAGCGGGCCGACGCGCCCGTTCGCGGCGGGGTGCGCCAGGAGACGGGCGGC  
CGGGGGTTCGAGTGCATGACTGA

>hut:Huta\_1758-Ar nitrite and sulfite reductase 4Fe-4S domain-containing protein; K00366 ferredoxin-nitrite reductase [EC:1.7.7.1] (N)

ATGCCCTCGAAGGTTCGAGCGATGGAAGGACGAGACTTACGGGATGGAGATACGCGACCACCTCGAACGATTTG  
CCGAAGAGGGGTTTCGACGCCATCCCGGAGGACGAACCGGACGCGTGGTTTCGAGCGGTTCAAATGGTGGGGACT  
GTACCACCAGCGGAAGGGCCAGGAGAGTTACTTTCATGATGCGCATCGGGACGCCGATGGGCCGGATGACGCC  
GCACAGCTCCGGACCGTTCGGCGAGGTGGCCCGGAGTACGCCACCGGCCCGTTCGACAACCCCGAGTTTCGGCG  
ACGCCCTACGCCGACTTCACGACGCGCCAATCGATCCAGCTCCACTGGATCAAGATCGAAGATATCCCTGACAT  
CTTTGACGAACTGGAGTCTGCGGGTCTCTCGACCATCCAGGCCTGCGGTGACTCCTGGCGCAACATCGTTCGGC  
TCGCCGGTTCGTCGGCCGGGATGCCGACGAACCTCGTTCGATGTTTGGCCCATCGTTCGAAGAGCTCCACGACCGTT  
TCAAGGGCAACGATCTTTACACGAATCTTCCCCGCAAGTGGAAAGGTTCGCCGTACCCGGCGACCGTTCGCGGTGC  
CGGCCAGGGCGATATCAACGACCTCGCCTTCGAACCGGCGGTCAAGGAGATAGACGGCGAGGACATCGCCGGC  
TTCAACGTCAACGTTCGGCGGCGGCTTGGCTCGCAAGGAGCCCCGGCTGGCCCGCAGCATCGACGTTCTTCTGCC  
GACCCGAGAACGCTGCGGAGGCGCGCCGCGCCTCTCCGGACTCTTCCGGGACTACGGCGACCGTTCGAGGACCG  
GTTCAACGCCCGGATGAAGTTCTTCGTCGACGAATGGGGAAACCGAGAAGATCCGGTTCGGTGTCCAGGAGGAG  
TACGTCGAGTACGACCTCCCGACGGCGGGCCAGGGCCTCCGGGAGGAGTACGACTACAACGCCGGGCGGTTCGG  
ACGCGCCGGGCGACTACGTCGGTGTCCACGACCAGGCCGACGGCCAGCATTTTCGTCGGGCTCTCGGTGCTCGT  
CGGGCGGATGGCCGACAGGACGTGATCGAACTCGCGGACTTGGCCGAGGAGTACGACTCCGAGATGATCGGC  
TTGACTCAACGTTCAGAACGTCATCGTTCGGTTCGATCGCCGAGTTCGGACCTGGACGACTTCTTCGCGGAGTTCGG  
TCCTCGAGAACTACTCGCCGACCCCCATCCCTTCATGCGTGGCTCGATCGCGTGTACGGGGACCGAGTACTG  
CTCGCTGTGATCGTTCGAGACGAAAACCGGATGGTCCGGTACGCCCGCTGGCTCAAGGACAACGTCCCGGTG  
CCCGAGGGCGTTTCGGACTTCCACATCCACCTCTCTGGGTGTACGGCCTCGTGTGCCAGCCCCAGATCGCCG  
ACATCAGCCTCCGCGGGATGAAGACCCGCAAGGACGGCGAGGCGGTTCGAGGCCTTCGACGTCGGGCTGGGCGG  
TGGCCTCGGCGAGAACCACAGTTTCGCCGACTGGGTGGAGATGCGCGTCCCCGCTGACGAGGTCCCGGGCTAT  
ATCGCCAACCTGCTCGAGGTTTACGAGGCCAACCGTTCGAGGTCAGGAGTCTTCCGGGAGTTTCGTCACCGACC  
GCGAGGAGGACGAACCTTCGGGGCTCGCCGAGCCCGAAGAGACGAGTTACGAGGACCCGTACCTCGGCAACAC  
GAAGATGACGTGGTATCCCTACGCCGACGAGGAGGAGATGAGCGCCTCGCCAGCACCGACGAACGCCAGCGGC  
GAACCCATTCCACCGACGATTGA

>hla:Hlac\_1407-Ar nitrite/sulfite reductase hemoprotein beta-component ferredoxin domain protein; K00366 ferredoxin-nitrite reductase [EC:1.7.7.1] (N)

ATGGCCAACAAAAGGAGGACTGGAATCGGAGATGTACGGCGACGAGGTTTCGCGAGAAGCTACTGGAGTTTCG  
CGGAGACGGGGTTCGAGTCGATCCCGGAAGACGAGCGGGACGCGTGGTTCACCCGGTTC AAGTTCTGGGGAGT  
GTTCCACCAGCGCTCGGGCCAAGAGGGCTACTTCATGATGCGGGCTGACGAACGCCAACGGGATCTTGGAGCCC  
GGTCAGCTCCGCGCGATCGCCGAGGTCGCCCCGCGACTACGCGTCCGGCCCGGTGTGCAACCCCGAGTTCGGCG  
ACAGCTGGATCGATCTGACGACCCGCCAGTCCGTCCAGCTCCACTGGATCAAACCTCGAAGACGTCCCGGAGAT  
CTGGGAGAAGCTCGAATCGGTGGCGTGACCACCCGGTCTGTCGGGCGGCGACACGATGCGGAACATCTCGGGC  
AGTCCGGTCCGCGCAAGGACGCCGACGAGGTGATCGACACGCTCCCGCTGCTCGAACGGTTC AAGAGGAGA  
TCCGCGGCGACGACGACCTCTGTAACATGCCCCGGAAGTTCAACATCAGCATCTCCGGGACGCCCGAGGGCGG  
CGCGCAGGACGCGATCAACGACATCGGACTCGAACCCGCGAAAAAAGAGATCGACAGCGGGGAGACGCTCGGC  
TTCAACGTGCGCGTGGCGGGCGGGCTCGGCGGGCGAGAGCCCCGCGTCCCGCCCGCTGGACGTGTTCTGTGA  
CCCCGGACGAGGCGTACGACGTCGTCCGCGGGTTCGTGCAATTGTACCACGACCACGGCGACCGGCAGGTCCG  
CGGAAGAACCCTCGCGCTTCTTCGTGACGATCACGGCACCGAGTGGATCCGCGACCTGCTCGACGAGGAG  
TACGTCGACGCCGATCTGCGGACCGCCGGCGAGGACATCCGCGACGAGTACACGTACAACGCCGGTTCGGACCA  
CCGAGGACGGGAAGCAGGACTACACCGGCGTCCACGAGCAGAGCGACGGAAGGCGGTACGTGGGCCTCAGCGT  
CCCAGTCCGTCCGGTCCGCGCCGAGGAAGCGATCGAGCTCGCCGACCTCGCCGACGAGTACGGTCCGGCGAG  
GTCCGGCTCACGCGCCGGCAGAACCCGATCATCGTCGACGTGAACCTCCGACCGCGTGGACGAGCTGCTCGCGG  
AGCCGCTGCTCGGAAACACCGGCCCGAACCGAACC GGTTTCGTCCGCGGGGCGATGGCCTGTACCGGCACCGA  
GTTCTGCTCGATAGCGCTCGTCGAGACCAAGACCCGAATGGCGACGATGCTCCGCTGGCTCCGCGAGAACGTC  
GACCTGCCGGACGACGTCGACCAGCTCAAGATCCACTTCTCCGGTGCACCCCGGACTGCGGACAGGCCAACA  
CGGCGGACATCGGCCTGCTCGGCATGCGAGCGCGGAAGGACGGCGAGATGGTCGAGGCGGTGACATCGGCGT  
CGGCGGGCGGATGGGCGAGGAGCCGTCTTCGTGACTACGTCCAACAGCGGGTGCCGCGGACGAGGCCCC  
GGAGCGATCCGGAACCTGATCGAGGCGTTCGCGGAGCGCCGGGCGCCGGGCCAGACGTTCCGCGAGTGGGCGG  
ACGCGACCGACACCGAGACGCTCGCGGCGCTGTGCGAGCCGAGGAGACGGACTACGTCGACCCGCTCGCTCAC  
CGACGCGAAGCAGTCGTGGTACCCGTTCCGCGAGGAGGGGACGACGGCGGCAATCCGGAGGTGGCCTCCTCG  
GATGACTGA

>hwa:HQ1116A-Ar nirA; ferredoxin--nitrite reductase (EC:1.7.7.1); K00366 ferredoxin-nitrite reductase [EC:1.7.7.1] (N)

ATGCCGACGGACGTCGAACGCTGGAATCAGAGGTGTATGGGCAGGAAATACGCGAGCATCTCTTTGAGTTTCG  
CTGAGGAGGGATATGATACAATCCCGGAGGATGAACGAGATGCATGGTTTGAGCGGTTCAAATGGTGGGGTCT  
TTACCATCAGCGAAACGGACAAGAAGGTTACTTTATGATGCGGATCGGGACACCAAACGGTGTATGAAGCCT  
GGTCAGCTTCGCGTAGTCGGTGAATTTGCATCCGAATATGCCACTGGTCTTGGTGTGAATCCAATATTCGGTG  
ATGGATACGCTGATTTACAACGCGACAGTCAATCCAACCTTCACTGGATTGAATTATCAGATATCCCGGATAT  
CTTCGAGAAGCTTGAAGAAAACGGGCTTTTCGACACAACAGGCATGCGGTGACTCATGGCGAAATATTGTTGGA  
AATCCTGTTGCCGGTAAGGATGCACGTGAGGTTATCGATGCATGGCCAGTCATTCATGACCTCAATGAGACAT  
TCAAGGGGAATGATGATCATTTCAAATCTGCCACGAAAAATGGAAGGTTTCTGTTACCGGTACGCCTGATGGTTC  
CGGTCAAGGCGATATCAACGACCTTGCCTTTGAACCAGCCTACAAAACGATTGATGGTGAGGAGACTGTTGGA  
TTCAACGTTTCGTGTTGGAGGCGGTCTTGCTCGTAACGAGCCACGATTTGCTCGTGACATCGATGTTTGGGTCC  
CTCCAGCGGATGTGTCAACAGTCGCAGGTGGACTTTTCAGCGTTATTCGAGATAACGGCGATCGTGAAGATCG  
ATATAACGCCCGTATCAAGTTCCTTGTGCGACGAGTGGGGTGCAGACAAAGTTTCGTGAGACACTCCAATCGGAG  
TATGTTGACTTCGAGTTACACACGGCTGGACGTGACGTTCGAGAGGAATACACATACAATACCGGAGATGGTG  
ACCGCAATGACCTGATTGGGGTACATGAACAGCAGCAGGATCATACTTTATTGGATTGAATGTCCTTGTGG  
GCGAATGGGAGCATCTGATGTGCTTGAACCTGCTGATCTCGCCTCTGAATACGGATCTGGTGAAGTTCGACTT  
TCTCAGCGACAGAATATCATCGTTACGGATATTCCAAAGGATGCTGTTGATGAATTCACGAGTGAGCAACTTC  
TCGAAAATTACTCACCAGACCCATCTCCATTCATGCGGGGATCTGTTGCCTGCACAGGTACTGAATCTGTTC  
GTTATCTATTGTGCGAGACAAAGAACCAGCAAGTTCGATACGCTCGATGGCTGAAAGACAATGTCACGCTTCCG  
GGTGACGTTGACGAGTTTCATATCCACCTATCAGGATGCACTGCTTCCTGTGCACAACCACAGATTGCAGATA  
TCAGCCTTCGAGGGATGAAAACGCGCAAGAATGGGGAGCCTGTTGAGGCTCTCGATGTTGGTCTTGGCGGTGG  
ACTTGGTGCAGAGCCACAGTTCGCACGCTGGGTGACTCAACGTGTTTCCTGTTGATGAGATTCCCGGTGCAATC  
TCAAATCTGATTGAAACGTTTGTGCTGAGCGTAACGATGACGAATCATTCCGTGCGTTCATCGATAGACATG  
ATAATGATGAGCTTGATTCATTTGTTGCGCCTGAGGAGACCGATTATGAGGATCCAATGATGCACAATACCAA  
CGGTACGTGGTATCCATATGCAGAGAATGACGGTCTTGATGCCGACCATCTGCACCCGCGGACGACTAA

>hwa:HQ2212A-Ar nirA; ferredoxin--nitrite reductase (EC:1.7.7.1); K00366 ferredoxin-nitrite reductase [EC:1.7.7.1] (N)  
ATGACGACAAAGAAAGAACAGTGAAGGATGAGATGTACGGTGACGAGATACGAGAGAAGATTCTTGAGTTTG  
CCGAGTCCGGATGGGACTCGATCCCAGAGGATGACCGCGAAATGTGGTTTTCCCGATTAAATTTCTGGGGTGT  
CTTCCACCAGCGGTCTGGGCAGGAGAGTTACTTTATGATGCGATTGGCGAACACCAACGGCGTCTGAACGCC  
GAACAACCTCCGCGTCATTGGAGAGGTCGCCGAGAGTACGCTATCGGTCCAGTCTCAAACCCAGAGTTTGGCG  
ATGCGTGGATTGACTTCACTACCCGACAATCGATAACAATTCATTGGCTCAATCTTGAAGATGTGCCAGAAAT  
CTGGGAAAAAATTGAATCCGTCCGATTATCATCTCGGTCTGCTGGAGGCGACACAATGCGTAATATCTCTGGG  
TGTCCGGTTGCTGGGCGAGACAAACATGAGTTCGTGACGCACAACCCGGTACTTGATGAGATATCCACGAAAC  
TCCGCGCTGACGATGACCTTGCAAACATGCCTCGAAAGTTCAACATCAGTGTGACCGGTTGTCGTGAGGGATG  
TGCGCAGGACTCGATTAACGGCATCGGACTTGAACCCGCGAAAAGACGATTGACGGCGATAACAACATGGGGA  
TTCAACGTCCGCGTTGGCGCGGTCTCGGCGGTCTGAGCCACGCAAAGCACGGAGTCTTGATATCTTTGTCA  
CGCCCACAACGCATATGATGTTGTCAGAGGATTTGTCGAACTGTACTTTGAGACCGGAGATAGAGAAAACAG  
ACAAAAAACCGAAGTCGTTTTTTGTTGATGATTGGGGGACGGAAAAGATCCGTGACCAACTCCAAGAGTCA  
TACGTTGACTTTAATCTCCGCGCGAAGGAGCGGATTGTGCGGATGAATATACGTATAATGCCGGTAAGTCAC  
CAACAGACGGCAAACATGATCACATCGGCGTTCATGAGCAAACGGACGGCACCTACTACGTCCGTCTCTCGGT  
GCCAATTGGGCGGCTCACTGCTGGTGAGACCGTCCGACTTGCCAATCTAGCGGAGATACACGGGTCTGGAGCA  
ATGCGACTCACGCGACGACAAAACCCGCTGATCTTAGATGTCCCGAGTCAAGACTCGACGCGCTCTTGACGT  
CTGATTTGCTTGAGACTCACAGTCCCGAACCAATGTGTTACGCGAGGTGCAATGGCGTGCACAGGCACGGA  
GTTCTGCTCGCTTGCGCTGACGGAGACGAAAGCTAGAATGGCAACGCTGCTCCGATGGCTGCGGTGCAATGTG  
GACCTACCAGATGACATCGAACAGATCAAATTCATTATTCGGTTGTACGGCTGACTGTGGTTCATGCAACGA  
CTGCCGACATCGGATTTGAGGGAATGCGAGCGCGGAAAGACGGAGAAATGGTTGAGGCGATTGATGTTGGCGT  
TGCGCGCGGCATCGGTCTGACCCCTCTTTGTCGAGTGGATCAGACAGCGTGTGCCGGCAGACGAGGTTCT  
GGACTCTTGCGGAACCTTCTTGAACGTTTCGACGACACCCGCGAAAAGGGACAAAACGTTTAGACAATGGGTTG  
AGGCGACCCAGGAGGAGGTGCTTATCGAAGCCGCGAGCCGGAAGAAACCGATTACGAGGACCCGTGTCTCCA  
CGACGCAAAGGATCATGGTACCCGTTTGCAGATAGTGAGGGACCTGCTCCAACCTGCCCCGACGACACGTCA  
CTAGCGACTGAAAGCGATGACTGA

>afu:AF0164-Ar nirA; ferredoxin-nitrite reductase; K00366 ferredoxin-nitrite reductase [EC:1.7.7.1] (N)  
ATGGCAATTGAAGTCGAGCTTCACAACTGCGGGAATGGATGTGGAATACTCCCTCGGCAGAGATGGGGGCA  
ATAATTCTGATCACTTTCTTCGTATAAAAATTCGGGGCGGGATAATTTACCCGGATCGGCTGAGAGGTGTTGC  
TGAGCTATCAGATAAAATATGGGAGAGGTTATGCTGAGATTACGACGAGGCAGGACATACAGCTTCACTGGATC  
GAGGCTGAGGATGCTCTGGAAATCTTCGCTGAGATGGAAAAGCTTGGCTTCACAACAGACCTGTGCAGTCAGG  
CTTTTGCCGAAACATGCCACGGTGATGTGAGAAACGCCGTCTGCTGCCCTCTGTCTGGGAAAAGGGATACGA  
TGCTTACTGGCTTGTAGGGAGATTACGGATTTCTTCTCAGGCAACCCGGATTACGTGACCTTCCGCACAAG  
TTCAAGATTGGCATCTCACTTGCAGAGCAACTGCATAAAGGAGGAGGCGCAGGACTTGGCAATGCAGTGGAA  
ACGGCGAGGGGTTTGTACCGCTTGTGGGGGAGGACTGGGGGCTTCGAAGCCCGGAGTCAAGGAAAGAG  
CTTGAGAATCGTTGTTTACGAGGAGGATGCCTTCGATTTTATAAGGACGGTCATAGACATCTACAAAGACTTC  
AGAGCTGAGAGAAAAGCAGAGGCAAGGTTCAAGAACTTTTTTGAGACTGCTGGATGCGAGTGGCTGAGAAGAG  
AAATTGAGCTCAGAATGGGTGTTAAATTCGATTTAGCTGATGATTTCAACTGCAATCCGCCATCAGAGCACAC  
TGAGGGCTTGCAGGATGATGGCAGCAACTACTACACCCCTCCTGTGTTTCGACGGTATCCTCGACTCGGAAAGG  
CTGAGCTTCACTGCTGAGGTTGCTGAGGAGTTTATGAGGAAATCAGGCTCACACCATGGCAGAACGTTGTTT  
TCACCGATATTGACGACTTGAAGGCTTTGAAAGAGAGGCTTTCCGAGCAGTTTGACCTCAGTGTCCAAGAAT  
GCACATCGCCTGTGCATCGAACTTCTGCGGTAAGACGCTGGTGCACGCAAAGGACGTTCTCAGGCACATTCCA  
GCGAGCGATAGATTTGTGGGGTGAGCGGATGCAGCAACGCCGTGTGCCTGCCATCCTCTTGCTGAAATCGGAC  
TTTGTGGGAAGGTTAAAGCAGGAAAGCAGCTCTACGACGCTTTCATTACGGCTGGAAGGAGGCGGAGAACCT  
GAGCGTTGAGGAGGCGGTTGAGCTCATTAAAAACATCTTGGTGATGGATATGGAGCTAAAGCTGATTGA

>nph:NP4004A-Ar nirA\_3; ferredoxin--nitrite reductase 3 (EC:1.7.7.1); K00366 ferredoxin-nitrite reductase [EC:1.7.7.1] (N)  
ATGACGCTGGATATCGACACTATCGCTCCCGAAGCGCTTGCGGACGAGCGGGAGCAGTACACCATCGTCGACG  
TTCGGGAGCCGAGAGACTACCGCAACTCGGGCATATCCCGGAGCGGCAACGTTCCGTTCCGAGCGGATTCCG  
GGACCGCAGCACCGACGCCGCGGGCCGACTCCCGACACCGGCGACGGTTCGACAGCAGCTATCGGCTGCCGGT  
GTCGAGCAAGGGGACCCACTCGTCCGCTATGACAACAGCCGCGGCGTTGAGGCGGCTCGATTTCTGCTAACGG  
CGGCGGTTTACGGCCACGACGGACCGCTGTATCTCCTTGAGGGTGATTTTCGATGTCTGGCAGCACGACAACGA

GACGGAACGCGGCCCGGGCCGGAGGGTTCTCGGAGTACGGCGCGGTGGCGCTCGATGAGGACGCCATCGTC  
AACCCTGCGACCGTTCGAGGCGGCCATCGACGCGGACGAAGGGGCCGACTGGTTCGATAACGCGAACGGCCGGCG  
AGTACGAGAGCGCCACCTGCCGGGGCAGTGCATCTCGGCTGGGAGGCCTTCGTTGACGCCGAAACCGACCG  
ACTCAAGCCGGAGTCGGAGCTGCGGACGCTGCTGGAGAGCCGCGGCCTCTCGTCCGACGACGAGATACTGCTC  
TACTGTAATACAGCCCGCGGCTTAGCCACACCTACGCCGTTCTCTCGTTCGCTTGGCTACGATGAGGTCCGAT  
TCTACGAGGGCGAACTTACCGGTCTGGTGCGGGCGAACTCGCCCGCTGGGACCCCAAGAGCTCTACCACTC  
AGTGAAGGGCGGTTCGCCCCGGAAGGGTTTCGACGCACTGCCGGCCGAACTCGGTGACGATATCTTCAGCCGCCTC  
CACCTGCTCGGACTCTACACGACCCGGCAGGACGGCTACTTCATGCTCCGAACGAAGATTCCCGGCGGGCAGC  
TGACAGCCGAACAGGCTCGCACTGTGCGGCGAGTTCGCCACCGCGCCGCGGGAACACGGCGG  
CAGCGAGCAAACCCCGTCTTCGGTGACGGCTTCTTGACGTGACAACACGGCAGGGCATCCAGATGCACTGG  
ATTTCGATCGAGGACATGCCGAAATCTGGGACCGGTTTGGAGTCGGTTCGGGCTGACGACGATTTCAGGCAAGCG  
GGAACACGCTCCGGAACGTCGTCATCTGCCCGGACGCGGAGTTCGGCCACGAGACGGTTCGACGTTTCGCGGGCT  
CGCGGAGGATGTGCGCGACGCCTTCGAGGGGAGTACCCGGTATGCGAACCTCCCTCGGAAGTTCAAAGTCAGT  
CTCTCGGGCTGCCACGAAAATGTGGCCGCGCGGAGCTACAGGACCTCGGATTCGTCGCGGGCTCAAGGACG  
GCCGCGACGGCTTTGCTGTCAAGGTTCGGCGGGCGCCTCTCCGACGGGCGCGAGCGGCGACCGACCTCGGCGT  
TTTCGTTCCACCGGAGCGAGTTCGTCGACCTCTCGCTTTCGGCTGCGGACCTGTTTATCGACCACGGTTCGCTAC  
CTCGATACTGCAGTCAATCGCTTGAATAACATCGTCGACCGCTGGGGGACCGACCGATTCCGCGAGGAACTCG  
AATCCTACGTCGAGTTCGAGTTCGAGCCCTACGACGAGCTGTTGACAACCGAGTACCGCGGCGACACGTCGG  
TATCCACGAGCAAGCCGATGGGAACCACACGGTTGGGCTGAACCTCCCGACCGGTGCAATCTGCGGCGATGAG  
CTACAAACGCTCGCCGACATCGCCGAGCGGTACGGCAGCGGCGAGGTCCGGACGACGGCGAACAGAACCTCG  
TCGTCCCCGGCGTCCGTGGCGAGGTGCTCGAATCGATGCTCGGCGAGCCGCTGCTTTCGTGCTACAGTCCCGA  
CCCGGGGCGGTTCTCGCGGGGTATCGTCACCTGTACCGGCGGGGAGTTCTGCAAATACGGCGTTATCGAGACA  
AAGAGCCGCGGCTATCGGTGGGCGAAGGAACTCGACGCATGGCTGGACGACCGCGATATCCAGAGTCCGCTG  
TCCCTGAAGCCGTTTCGATATTCATATGAGCGGCTGTTTCGGCGTCTGTGTCGCGAGCCACAAATCGGCGACATCGG  
GCTGCGCGGCGAAGCCTATCGCGACGAGACCAAGCCGCACAGGCGGTTCGATGTCGGCTCGGCGGCGACCTC  
GACCGCGACCGATTTCGTCGACTGGGTCTCCGGCCGCATACCGGTTGGCGAAGTGGCGACGCGGTAAAACGGG  
TCCTTCGGCGGTTTCGTCGAGACCCGACGGGACGGCGAGACGTTTCGCCGAGTGGGCCGACCGGACCGACACCGA  
ACGACTAGACCGAATCGTCACGACAAGCACACACCCACAGGAGGCAGACTGA

>nph:NP1146A-Ar nirA\_2; ferredoxin--nitrite reductase 2 (EC:1.7.7.1);

K00366 ferredoxin-nitrite reductase [EC:1.7.7.1] (N)

ATGCCGAGCAAGGTTCGAAGCCTGGAAGACGAGGTCTACGGAACGGAAATCCGTGACCACCTCTTCGAATTCG  
CCGAGGAGGGCTGGAGCGCCATCCCCGAGGACGAACGTGACGCGTGGTTCGAGCGGTTCAAATGGTGGGGGCT  
GTACCACCAGCGGAAGGGCCAAGAGAGCTACTTCATGATGCGTATCGGGACGCCGAACGGTTCGGCTGACACCC  
GACCAGCTTCGGGTTCGTCGGCGAAATCGCCGACGAGTACGCCCGCGGACCCGTCGACAACCCCGAATTCGGCG  
GGGCATACTGTGACTGGACGACGAGACAGGCGATTTCAGCTCCACTGGATTTCAGCTGCAGGACGTCCCCGAAAT  
CTTCGACAAGCTGGAGGCGAACGGCCTCTCGACGATGCAGGCCTGTGGCGACTCGTGGCGGAACATCGTCGGC  
TCGCCGATGACCGGCCGGGACGCCAAAGAGCACATCAACGCGTGGCCGGTTATCAAGGAGCTCAACGAGACGT  
TCAAGGGCAACGACGACCACTCCAACCTCCCTCGCAAGTGGAAAGTTCGCTGTACGGGCGACACCCGTGGGTTC  
GGGACAGGCCGAAATCAACGACCTCGGCTTCGAGCCGCTGTCAAGGAAATCGACGGCACGGAGACGAAAGGG  
TTCAACATCCGCGTTCGGCGGCGGCCTCTCCCGGAAGGAGCCGCGCTTTGCGCGGATATGACGCTCTTTGTCA  
CCCCGGGGAGGTCGCCGACGTTGCCGGCGGGATTTCGGCGCTGTTCCGCGACCACGGCGACCGTTCGAGGACCG  
CTTCAACGCCCGCATCAAGTTCCTCGTCGACGAGTGGGGGACCGAGAAGCTCCGGCGCGTGTGCAGGAAGAC  
TACGTCGACTTCGAGCTGAAGACGGCCGGCGAGGACCTCCGCGAGCAGTACAGCTACAACGCCGGACGGAACG  
ACGAGGTTCGGCGACTACGTCGGTGTCCACGAGCAGACGGACGGCAACTACTTCGTCGGTCTCTCGGTGCTTGT  
CGGCCGAATGGGAGCACAAAGAGTTCATCGAACTGGCCGACCTCGCCGACGAATACGGCTTCGGAGCTCATCGGC  
CTCACACAGCGACAGAACATCGTCGTCGCCGACATCGCCGAGGAGGACCTCGATGCATTCCTTCGAGGAGGACC  
TGCTGGAGTACCACTCGCCGGACCCCATCCCTTCTGCGCGGGTCTATCGCCTGTACGGGACCCGAGTTCTG  
CTCGCTGTCCATCGTCGAGACGAAAACCGAATGGTCCGCTATGCCCGCTGGCTGAAGGACAACGTCGATGTC  
CCCGAGGGCGTCTCCGAGTTCACATCCATCTGTTCGGGCTGTACGGCCTCCTGTGCCAGCCGACAGATTGCCG  
ACATCTCCCTGCGCGGTATGAAAACCCGCAAGGACGGCGAGCCGGTTCGAGGCCTTCGACATCGGGCTCGGCGG  
CGGCCTCGGCGAGAACC CGCAGTTTGCCTGACTGGGTTCGAGATGCGCGTGGCCGCCGACGAAGTGGCCGGCTAC  
ATCCAGAACCTCCTTGGCGTCTACGAAGCCGAACGGGAGGGCGACGAGTTCGTTCCGGGAGTTTCATTGCCCGCC  
ACGGCGAAGACGAGTTGGGCGGCCTCGCGGAGCCGGAGGAGACCTCTACGAGGACCCGTACCTCGAGAACAC

GAAGATGACGTGGTATCCGTACGCCGAGGAGACGGAGATGGACGCCTCCCCGGCCCCGTCGCCGGCTGACGAC TAG

>nph:NP4224A-Ar nirA\_1; ferredoxin--nitrite reductase 1 (EC:1.7.7.1); K00366 ferredoxin-nitrite reductase [EC:1.7.7.1] (N)

ATGCCGCATAAAAAAGAAGCGTACAAGGAGGAGTTGTACGGTGACACAGTACAGGAGAAAAATCCTCGAGTTCCG CCGACCGCGGGTTCGATTCTATTCCCAGTCCGAGCGCGACGAGTGGTTCTGCCGGTTCAAATTTCTGGGGGCT CTTCACCAGCGCTCTGGACAGGAAGGCTACTTCATGATGCGCTTGACCAACTGTAACGGTCGGCTCGACCCG GGACAGCTTCGAGCAATCGGCGAAGTCGCCGACGAATACGCGACAGGTCCCGAAACGAACCCCGAGTTCCGGCA ACGGGTGGATTGACCTGACGACCGCGCAGTCCGTTACAACCTCCACTGGATACGGCTCGAAGACGTTCCGGATGT GTGGGACAAACTCGAAGCGGCCGGTGTACGACCCGCTCGTCGGGCGGCGATAACAATGCGGAACATCGTTGGG TGCCCGGTTGCCGGCAAGGCCGACGACGAAATCATCGACACCAGCCGATTCTTGACCGGTTCCAAGACGAGA TCCGGGATGATGACGCGCTCTGTAATATGCCGCGGAAATCAACATCTCTATTACAGGGACGCCGGAGGGCGG CGCACAGGACTCGATCAACGATATCGGACTCGAACCAGCACAAAAAGAGATTGACGGCGAGGAGCAGCTCGGA TTCAATGTTTCGCGTCGGCGCGGTCTGGGCGGCCATGAGCCGCGGGTTGCGCGTCCGCTCGACGTCTGGGTCCG CCCCCGACCGTGCGGTTCGACATCGTGCAGCTTTTCGTCGAACTGTACCACGATTACGGGGACCGCGAAAACCG CAGCAAGAATCGGTCACGGTCTTCGTCGATGATAACGGACCCGAATGGATCCGAGAGACACTGCAGGCGGAG TACGTCGACTGGGAACTCAAACCAGCGCGCGGATATGCGGGATAGATACACCTACAATGCCGGGCGTCCCA GCGAAGACGGCGCATTTCGACTACGTCGGCGTCCACGACCAAAAAACGGGAAGAAATGGGTCCGGTCTCAGTGT TGCCTGTGGACGGCTCGAATCACAGGAAGCGATTTCGGCTTGCGGAACTCGCCGCGGAGTACGGTTCCGGGTGAA GTTCGGCTAACCGCGCCGACAGAATCCGCTGATTATGGATGTCGACCCGAACAGGGTTGATGACCTGCTCCGAG AGCCCTTGCTGCACAAACACAGCCCGAACCAGCCCATTCGTCGCGCGCGACCCGCTGTACCGGCACGGA GTTCTGTGGACTCGCCCTAACCGAAACGAAGGCCCGAATGGCCCGGATGCTCCGGTGGCTGCGGGACAACGTC GACCTGCCCGAGGACGTGTGCCAGCTTAAAATTCATTTCTCCGGATGCACGGCCGACTGCGGACAGGCCAACA CCGCCGACATCGGCTTGCTCGGGATGCGGGCCCGAAAGACGGTGAGATGGTTCGAAGCGCTAGATATCGGCCT CCGTGGCGGTATCGGTGAGGACCCATCGTTTGTCAACTGGATTTCGCCAACGCGTCCCCGCCGACGAAGTGCCT GGCGGATCAAAAAACATCGTTCGAAGCGTACGCGGCCACCCTTTGCGGGACAGACGTTCCGTGAGTGGGTG CTGCGACGAGCGACGAGCAACTGATTGAGCTGTGTGAGCCTGTCGAGACGAGCTACGACGACCCGTGTCTCTA CGACGCCAAGCAGTTCGTGGTATCCGTTTCGATGCAGAAAAGCAGGCCACCAAGGGCGTCCAAGGTGCTGACGAC TAG

>hhi:HAH\_3043-Ar nirA2; ferredoxin-nitrite reductase (EC:1.7.7.1); K00366 ferredoxin-nitrite reductase [EC:1.7.7.1] (N)

ATGGCACATAAAAAAGGAGGAGTACAAGGCGGAGCTGTACGGCGACGAGGTACGGGAGAAGTTAGAGGAGTTCCG CCGAGAAGGGCTGGGAGTCGATTCCCAGGACGAACGGGAGAAGTGGTTCTCGCGGTTCAAGTTCTGGGGGGT GTTCCACCACCGCGGGCGGCCAGGAGTCGATTTTCATGATGCGGGTGCACCAACTGCGGGCGGCGTCTCGAGCCC GACCAGCTTCGGGCCATCGGGCAGGTCGCTCGGGACTACGCGAAGGGACCGGCCGAGAACCCCGAGTTCCGGGA ACGGCTGGATCGACCTCACGACGCGACAGTCCATCCAGTTGCACCTGGCTCAAGCTCGAAGACATCCCGGAGAT CTGGGAGAAACTCGAAGCCGTCGGCGTCTCCTCGCGCTCGGGCGGGCGGGACACGATGCGGAACATCTCCGGC TGCCCGGTCGCCGGCAAGGCCGAGGAGTACGTCGAGTCCC GCCGATTCTGGACGAGATTACAGGAGACCATCC GCGACGATAACGACCTGGCCAACATGCCCGGAAGTTCAATATCTCGGTGACGGGGTGAAGCAGGGGTGTGC CCAGGACAGCATCAACGACATCGGGCTGGAGCCGGCCACAAGTTCAATTGCTGGCGAGGAAGTTCGAGGGGTTC AACGTCCGCGTCCGGCGGCGGCTCGGGCGGCCGGAACCGCGCGAAGCCCGTCCGCTCGACCTGTTTCATTCCGGC CCAAACACGCCGTCGAGACCGTGCGGGCCTTCGTCGAGTACTACCACGAAGCGGGCAACCGCCAGAACCGCTC GAAGAACCGCGCGCGCTTTTTCGTCGATGAACACGGTACTGACGCCATCCGGGAAGAACTCGACGAACGGCTT GATTTTCGAGTTCGAAACCGCCGGGACCGACTTCCGCGGGGAGTACACGTACAACCGCCGGCAAGCACACGGAGT ACGGTGCCACGACACGTCGGCGTCTACGACCAGAAAAGCAGACAAGAACTACGTCGGCCTCTCGGTGCCGGT CCGCCGACTCTCCGCCGAGGACGCCATCGAACTCGCGGATCTCGCCGACGCCTACGGCTCCGGCGAGGTGCGA CTGACCCGCCGGCAGAACCCGCTCATCATGGACGTACCCGACGGGAATCTCTCGAACCTCCTCAACGAGCCGC TGCTGGAGAAACACTCGCCGAGCCGAACCCGTTTCGTTACGGGCGCGATGGCCTGTACCGGGACGGAGTTCTG CTCGCTCGCGCTCACGGAGACGAAGGCGCGGATGGCCCGCTTGCTCCGCTGGCTCGGTGACAACGTCGACGCTG CCGGACGACGTGGACCGCATCAAGATGCACTTCTCGGGCTGTACGGCCGACTGCGGCCAGGCGATGACGGCCG ACATCGGCTTACAGGGGATGCGCGCCCCGAAGGACGGCCAGATGGTTCGAAGCCGTCGACGTGGGCGTCCGGCGG CCGCATCGGCGAGGAGCCGACGTTTCATCGAGTGGGTCCGCCAGCGCGTCCCTGCTGACGAGGTGCCGGCATG ATCGCCAACATTGTTCGAAGCCTACGCCGCGCTTCGCTCGGAGGGTCAGACCTTCCGCGAGTGGGTTCGACGCCA CCGTTCACGAGACCATCGTTCGAACCTGGCCGAACCCACGAGGTCCAGGGGTACACCGACCCGTGTCTAGCCGA

CGGCAAGCAGTCGTGGTATCCATTCGACGACGGCGAAAGCCCGGCCCGACCGACGCCGAGGGCCAGCCGATT  
TCGGCGGACGACTGA

>hma:rrnAC2992-Ar nirA2; ferredoxin-nitrite reductase; K00366 ferredoxin-  
nitrite reductase [EC:1.7.7.1] (N)

ATGCCCACGAAAGTCGAGAATTGGAAGGACGAGGTTTACGGTAACGAGATCCGGGAGCACTTGATGGAGTTTCG  
CAGAGCAGGGCTGGGATGCCATCCCGGAAGACGAACACGACGCCTGGTTCGAGCGCTTCAAAGTGGTGGGGCCT  
GTACCACCAGCGCTCCGGCCAGGAGTCGTATTTTCATGATGCGTATCGGGACACCAAACGGCGTCATCAAGCCC  
GGCCAGCTTGAAGTTATCGGCGAAGTCGCAAAGGAGTACGCAACTGGTCCCCTCGATAATCCGGAGTTCGGCG  
AGGCCTACTGTGACTGGACGACCCGTGAGAGCATCCAGCTCCACTGGATCAAACCTGGAGGACATCCCGGAAAT  
CTTCGAGAAGCTCGAAGCCGTGGCCCTGGGCACCCAGCAGGCCTGTGGTACTCCTGGCGGAACATCGTCGGC  
TGCCCGGTTGCCGGCAAGGACAAGCACGAGCACGTGACGCTGGCCCGTTGCCGAGGACCTCCACGAGACGT  
TCAAGGGCAACGACGACTACTCGAACCTCCCGCGCAAGTGGAAGGTGCCATCGCCGGCTGTGACGAGGGCTG  
TGGCCAGGGCGACATCAACGACCTCGCTTTTCGAGCCCGCTGAGAAGGACGGCGAACTCGGCTTCAATGTCCGT  
ATCGGCGGGCGCCTCTCCCGCAAGGAACCGCTCTCGCCCGGATATCGACGTGTGGGTCCC GCCGGAGCAGG  
CCGCTGACGTGGCCACGGCATGTCTTCGCTCTTCCGTGACTACGGTGACCGCGAGGACCGCTTCAACGCTCG  
CATCAAGTTCCTCATGGACGAGTGGGGGCCCCGAGAAGATGCGTTCGGTCTGCAGGAGGAGTACGTCGACTTC  
GAACTCCCGACTGCGGGCGAGGATATGCGCGACCAGTACAGCTACAACACCGGGTCCCAGGACGGACACAACG  
ACCACGTCCGGATTACGAGCAGAACGACGGCAACTACTACATCGGCCTGAACGTGCTGGTCCGCCGCATGGG  
TGCCGACGACGTGCTCGAACTCGCCGAACTCGCCGACGAGTACGGCTCCGGCGAGGTCCGACTGACCCAGCGT  
CAGAACATAATCGTCACCGACGTCCCCGAGGAGAACCTCGACGCGTTCACCAGCGAACCCCTGCTGGGAACT  
ACTCCCCGACCCCGTCCCGTTCATGCGCGGTTCCATCGCCTGCACGGGCACGGAGTACTGCTCGCTCTCTAT  
CGTCGAGACGAAGAACCGCCAAGTGCGGTACGCCCCGCTGGCTCAAGGACAACGTGCAACTGCCCGAGGACCAC  
AAGGACTTCCACATCCACCTCTCGGGCTGTACGGCCTCCTGCGCCAGCCCCAGATCGCCGACGTGTCCCTGC  
GCGGGATGAAGACCCGCAAGGACGGCGAACC GGTCGAGGCGCTCGATATCGGTCTCGGCGGGCGCCTCGGCGA  
CGACCCGCGCTTCGCTGACTGGGTGGAGATGCGCGTCCCGGCCGACGAAGTCCCCGGCGGATCAAGAACCCTC  
GTCAACAACCTTCGAGGACGCCCGCGAGGGCGGGCGAGACCTTCCGTGACTTTCGTTGCGGACCGCGACGAGGAGA  
CGCTGGCCGACATGGTCGAACCCGAGGAGACGGACTACCACGACCCGTATATGCACAACACGAAGATGACGTG  
GTACCCCTACGCAGAAGACGACGATATGCAGTCTCGCCCGCGCCGACTGACGGCTCTGGTGAGCCCCTGCC  
TCCGACGACTAA

>hvo:HVO\_1788-Ar nirA1; ferredoxin--nitrite reductase (EC:1.7.7.1);  
K00366 ferredoxin-nitrite reductase [EC:1.7.7.1] (N)

ATGCCCACGGACGTGCAACGCTGGAAGTCGGAGGTCTACGGTAACGAGATACGAGAGCACCTGCTGGAGTTTCG  
CTGAGCAGGGCTGGGACTCCATCCCGGAAGACGAGCGAGACGCCTGGTTCGAGCGCTTCAAATGGTGGGGACT  
GTACCACCAGCGCAACGGCCAAGAGTCGTACTTTCATGATGCGCATCGGAACGCCGAACGGCGTGCTGACGCCC  
GGCCAGACCGAAGTCGTGCGGAGGTCGCCGACGAGTACGCCCGCGGCCCGCCGAGAACCCCATCTTCGGCA  
ACGGCTACGTGACTGGACGACCCGCCAGTCGATTACGCTCCACTGGATTAAGCTGGAGGACATCCCGGAAAT  
CTTCGATAAGCTCGAATCGGTTCGGGCTGTGACCCAGCAGGCCTGCGGTGACTCGTGGCGGAACATCGTCGGC  
TGTCCCGTTCGCCGGCAAGGACAAACACGAGCACGTGACGCGCTCCCCGTGCGGATGGAGCTCAACGAGACGT  
TCAAGGGCAACGACGACCACTCGAACCTCCCGCGCAAGTGGAAGGTCTCCGTACCCGGCTGCCGCGAGGGCTG  
CGGTACGGGCGACATCAACGACCTCGCGCTCGAACCCGCGACCAAGGAAATCGACGGCGAGGAGACGAAGGGC  
TTCAACATCCGCATCGGCGGGCGGCCTCTCGCGGAACGAACCGCGGCTCGCCCGGACATCGACGTGTTCGTGA  
CGCCCAGCAGGCCCCCGAGGTGTCCGGAGCCATCTCCGCGTGTTCGCGACAACGGCGACCGCGACAACCG  
CTACAACGCCCGCATCAAGTTCCTGATGGACGAGTGGGGCGCGGAGAAGTTCGCAACGTCTCCAGGAGGAG  
TACGTCGACTTCGAGCTGGAGACCGCCGCGGAGGACCTGCGCTCGGAGTACTCCTACAACCTCCGGCTACGCCG  
ACGGCGGCCACTCCGACCACGTCCGCATCCACGAGCAGGCCGACGGCAACTACTACGTCCGACTCGACGTGCT  
CGTCGGCCGCATGGGCGTCGACGACACGAAGGAACTCGCCCGCTCGCCGACGAGTACGGCTCCGGCGAGATT  
CGCATCACGCAGCGCCAGAACGTATCATACCGACGTACCCGAAGAAAAGCTCGACGCGCTGCAAAACGAGG  
ACCTTCTCGACCACTACTCGCCCGACCCGCACCCGTTTCATGCGCGGCTCCATCGCCTGTACGGGCACCGAGTT  
CTGTTTCGCTCTCCATCGTGGAGACGAAGAACC GGCGAGGTCCGCTACGCCCCGCTGGCTCAAGGAGAACGTGAC  
CTCCCCGCGGGCGTCGAGGACTTCCACATCCACCTCTCGGGCTGTACGGCCTCCTGCGCCAGCCGAGATTG  
CGGACATCAGCCTCCGCGGCATGAAGACCCGCAAGGACGGCGAACC GGTCGAGGCGCTCGACATCGGCCTCGG  
CGGCGGCCTCGGCGAGAACCCGAACCTTCGCCGAGTGGGTACCCAGCGCGTCCCCGTGACGAAGTGCCGGGT  
GCCATCAAGAACCTGCTCGCGAACTTCGAGGAGCGCCCGGAGGGCGACGAGACGTTCGCGAGTTTCGTCGCC  
GGACGGACGAAGAGGAGCTGGCCGAAC TAGTCGAACCCGAAGAGACCAGCTACGAGGACCCGATGATGCACAA

CACGAAGCGCACGTGGTACCCCTACGCCGACGACGACGGCCTCGACGCGAGTCCCGGCCGACCCGCGCCGAC  
GGCAGGCCCATCGCGAGCGACTGA

>hhi:HAH\_0254-Ar nirA1; ferredoxin-nitrite reductase (EC:1.7.7.1); K00366  
ferredoxin-nitrite reductase [EC:1.7.7.1] (N)

ATGCCCAGTAAAGTCGAGAAATGGAAGGACGAGGTCTACGGTAACGAGATTCGAGAGCATCTGATGGAGTTTCG  
CAGAGAAGGGCTGGGACGCCATTCCGGAAGACGAGCACGACGCCCTGGTTCGAGCGCTTCAAATGGTGGGGCT  
GTACCACCAGCGTTCCGGCCAGGAGTCGTATTTTCATGATGCGCATCGGGACGCCAAACGGCGTCATCAAGCCC  
GGCCAGCTCGAAGTCATCGGCGAAGTCGCGAAGGAGTACGCGACCCGGCCCCGTCGATAACCCCGAGTTCGGCG  
AGGCCTACTGTGACTGGACGACCCGCCAGAGCATCCAGCTCCACTGGATCAAACCTGGAGGACATCCCGGAGAT  
CTTCGAGAAGCTCGAAGCCGTCGGTTTGGGCACCCAGCAGGCCTGCGGTGACTCCTGGCGGAACATCGTCGGC  
TGTCCCGTCGCCGGCAAGGACAAACACGAGCACGTGACGCCCTGGCCCGTCGCCGAGGACCTCCACGAGACGT  
TCAAGGGCAACGACGACTACTCGAACCTCCCGCGCAAGTGGAAGGTGCCATCGCCGGCTGTGACGAAGGCTG  
TGGCCAGGGCGACATCAACGACCTCGCCTTCGAGCCCGCCGAGAAGGACGGCGAACTCGGCTTCAACGTCCGT  
ATCGGCGGGGGCTCTCCCGCAAGGAACCGCGCCTCGCCCGGATATCGACGTGTGGGTGCCGCCGAGCAGG  
CCGCCGACGTGGCCACGGCATGTCCGCGCTTTCGCGACCACGGCGACCCGCGAGGACCGCTTCAACGCCCCG  
CATCAAGTTCCTCATGGACGAGTGGGGGCCGAAAAGATGCGCTCGGTCTCCAGGACGACTACGTCGACTTC  
GAACTGCCGACCCGGCGGAGGACATGCGCGACCAGTACAGCTACAACACCCGGTCCCAGGACGGGCACAACG  
ACCACGTCCGGATTACGAACAGAAGGACGGCAACTACTACGTCGGCCTGAACGTCTTGGTCGGCCGCATGGG  
CGCCGACGACGTGCTCGAACTCGCGGAACTCGCCGACGAGTACGGTTCGGCGAGGTCCGCTTGACCCAGCGC  
CAGAACATCATCGTCACTGACGTCCCCGAGGAGAACCTCGACGAGTTCACCAGCGAACCCCTCCTTGAGAACT  
ACTCCCCGAGCCGTCGCCGTTTCATGCGCGGCTCCATCGCCTGCACGGGCACGGAGTACTGCTCGCTCTCTAT  
CGTCGAGACGAAGAACC GCCAGGTCCGCTACGCCCGCTGGCTCAAGGACAACGTGCAACTGCCCGAGGACCAC  
AAGGACTTCCACATCCACCTCTCTGGCTGTACGGCCTCCTGTGCCAGCCCCAGATCGCCGACGTGTCCCTGC  
GCGCATGAAGACCCGCAAGGACGGCGAACC GGTCGAGGCGCTCGACATCGGTCTCGGCGGCGGCCCTCGGCGA  
CGACCCGCGCTTCGCCGACTGGGTGGAGATGCGCGTCCCGGCCGACGAAGTCCCGGCGCGATCAAGAACCTC  
GTCAACAACCTTCAAGAACGCCCGCGAGGGCGGGCGAGACCTTCCGTGACTTCGTGGAGGACCGCGACGAGGAAA  
CGCTGGCCGAGATGGTCGAGCCCGAAGAGACGGACTACCACGACCCGTACATGCACAACACGAAGATGACGTG  
GTACCCCTACGCAGAGGACGACGACATGCAGTCTCGCCTGCGCCGACTGACGGCTCTGGTGAGCCCTGCC  
TCCGACGACTAA

>hma:rrnAC2625-Ar nirA1; ferredoxin-nitrite reductase; K00366 ferredoxin-  
nitrite reductase [EC:1.7.7.1] (N)

ATGGCACATAAAAAAGAGGAGTACAAGGCGGAGCTGTACGGTGATGAGGTACGGGAGAACTAGAGGAGTTTCG  
CCGAGAAAAGGCTGGGACTCGATTCCCAGGACGAACCGGAGAAGTGGTTCTCGCGGTTCAAGTTCCTGGGGTGT  
CTTCCACCACCGCGGGCGGACAAGAGTCGTATTTTCATGATGCGGGTGCATAATTGCGGGCGGCGTTCTGGAGCCC  
GACCAGCTCCGGGCTATCGGCGAAGTCGCCCCGCGACTACGCGAAGGGGCCAGCGGAGAACCCTGAGTTCGGAA  
ACGGCTGGATTGATTTACGACACGACAGTCCATCCAACCTGCCTGAACTCGAAGACATCCCGGAAAT  
CTGGGAGAACTCGAAGCCGTCGGCGTTTCTCGCGCTCTGCGGGCGGGGACACGATGCGGAACATCTCCGGT  
TGTCCGGTCCCGGCAAGGCCGAGGAGTACGTGCGCTCTCGCCGATTCTCGACGAGATTCAGGAGACCATCC  
GCGACGACAACGACCTCTCCAATATGCCCGGAAGTTCAACATCTCGGTGACGGGGTGAAGCAGGGGTGTGC  
CCAGGACAGCATCAACGACATCGGGCTGGAGCCGGCCACAAGTTCATTGACGGCGAGGAAATCGAGGGGTTC  
AACGTCCGCGTCGGCGGGCGGCCCTCGGTGGTCGCGAACCCCGCGAGGCCCGTCCGCTGGACCTGTTTCATCCGGC  
CCGAACACGCCGTCGAGACGGTCCGTGCTTTTGTGCGAGTACTACCACGAGGCGGGCAACCGTCCAGAACCCTC  
GAAGAACC CGC CCGGTTTTCGTCGACGAACATGGGACCGACGCCATCCGCGAGGAACTTGACGAGCGGCTG  
GATTTTCGAGTTTGAACCGCTGGCACTGACTTCCGCGGGGAGTATACGTACAACCGCCGGCAAGTCTGCTGAAC  
ACGGTGGCCACGACCAGTTCGGCGTCTACGACCAGCAAGACGGGAAGAACTACGTCCGGCTCTCGGTGCCCGT  
GGGCCGACTCTCCGACAGAGGACACCATCGAACTCGCGGACCTCGCCGACGCCTACGGCTCCGGCGAAGTGC  
CTGACCCGCCGACAGAACCAGTTCATCATGGACGTCCCCGACGGGAACATTTGAACTCTCCTCAACGAGCCGC  
TACTGGACAAACACTCGCCGAGCCGAACCCGTTTGTTCAGGGGGCGATGGCCTGTACCGGAACGGAGTTCGTG  
TTCCTCGCGCTCACCGAGACAAAGGCGCGGATGGCTCGCCTGCTCCGCTGGCTCGGTGACAACGTGATGTG  
CCCGATGATGTTGACCGCATCAAAATGCACTTCTCGGGCTGTACGGCTGACTGCGGTCAAGCGATGACAGCCG  
ACATCGGCTTACAGGGGATGCGCGCCCCGCAAGGACGGCCAGATGGTCAAGCCGTCGATATCGGTGTGCGCGG  
CGGTATCGGCGCGGAGCCGACGTTTCATCGAGTGGGTCCGCCAGCGCGTCCCTGCTGACGAGGTGCCGGGCATG  
ATTGCCAACATCGTTGAGGCATACGCCCGCTTCGCTCGGAGGGGCGAGACCTTCCGGGAGTGGGTGACGCCA  
CCGGCCACGAAACAATCGTCGAGCTGGCCGAACCGGAGGAAAGTCGAGGGGTACACCGACCCATGTCTGGCCGA

CGGCAAGCAATCGTGGTATCCCTTCGACGACGGCGAAAGCCCGGCCCGACCGACGCCGAGGGCCAGCCGATT  
TCGGCGGACGACTGA

>csy:CENSYa\_0360-Ar ferredoxin-sulfite/nitrite reductase (EC:1.7.7.1);  
K00366 ferredoxin-nitrite reductase [EC:1.7.7.1] (N)

ATGACAAACGACTATTCAATGATAAGGGTAAAGGTGCCCGCAGGCGAGATACTCCCCAGCAGCTCGAAAAGA  
TAGCGTACCTGTCCGAGACCTATTCGATAGGCAGCGGCATTTTTCTACACGTGAGAATGTGCAGCTCCACTG  
GGTTGTTCTCGAGGACATATCCGAGATAATGAGGGGCCCTCGCCGAGGTGGGCATGACCAGCAGGGAGGCCTGC  
GGGAACACGGTCCGGAATGTGATGTGCGCCCCGCTTGCCGGCGTCTGCAGGGACGAGGCGTTCGACGCGACGC  
CGTACGCGCAGGCGACCGGCACGTTTTCTGCGCAATCCAATGTGCCAGAACCTCCCCGCAAGTTCAAGTT  
CAACTTTACATGCTGCGAAGATCACGGCATGGTCAGGATGGTAGACGTGGGCCTTGTCCCCAGACGCGCGAG  
ATCAACGGGGTTCATGCAGCGCGGGTTTATGATATTCCTCGGAGGTGGACAGGGAAACAAGGCATTTTTGGGCC  
ACCAGCTGGAGGGGTTACGCCCCGACGAGGATTTGTGTACACGGCCCTGGCGGTGCTGAGCGTATTCGACAG  
GCTCGGCGACAGAAAAAGATGGCGCGCAACCGCCTGAGATATTTGGTAAGCGAGATGGGGTGGGAAAAGTTC  
CGGAATTTAGTCTCAAGGAGAGGGCGCTGGCCCCGTCCAACCAGTCCGTGCTGACCCAGCTGGATAACCGATG  
GAACACCCCGCGGGATAAGGACCCCATGAGGATAGCCGACGAGGCGCCCGCCCGCTCCCCTCCGGCTTTGC  
CCGCTGGTTCGCACACCAATACGATACCGCAAAGCAGGACGGCTACCCTCGGTATTCATAACGCTCGAAGCT  
GGCGACATAACGGCGGCCAGCTCAGGTCGGTTGCGGCACTTTGCAGGGACTATTCCGCGGAGTGAAGGCGA  
GGACCGGCTTTTCATCAGAACGTGGTCATCCGGTATGTAAGGAGGACGACCTGCCCGGATGTACTCGAGGCT  
TCTCGAGGCGGGGCTCGCAAAGACGGGCGCCCTTACCATGGCCACCAGTGTGCGGTGCTCGGGGACCACCTCG  
TGCAATCTTGCCTAACCAACTCGCACAGGCTTGCAAAGAAGTGCAGAGAAAGCTCCTCGAGCTGGGGATAG  
ACGAGGATCCAGATTTCTCAAACCTTAGCATCAAGATAAGCGGATGCCCAACTCGTGCAGCCTGCACTGGAT  
GGCCACGCTGGGCTTTTACGGGGCGGCTCAAGGGCTGGCAGCAGCATGTACCCGGTATACCAGATGCTAGTC  
GGCGGCAGGTTTCGACGGACACTCCTCCCTGGGAATACCCATACTTAGGATTCCTGCAAAGCGGGTACATCCGG  
CGATACTCAAGGTGATAGAGCTGTTCCGGGAGCACAAAAAGCCGTGCGATACGCTAAAGTCATGGCTGCACAG  
GCTGGTCAGCGGCAACGGCGATGGAACCATAGATACCTGGACGCGCTCAAAGAAGAGCTGTCCCCGCTTACG  
GTGGCGCCCTCGATAGAGGTAGACCCGGACTTTTACAAGGACTATGGGAACGAGGATAACTATCACACAAAGA  
CCGGAAGAGGAGAGTGCCTCTTGA

>hmu:Hmuk\_0435-Ar Ferredoxin--nitrite reductase (EC:1.7.7.1); K00366  
ferredoxin-nitrite reductase [EC:1.7.7.1] (N)

ATGCCGACGAAAGTCGAGAAGTGAAGGACGAGGTGTACGGCAACGAGATCCGTGACCACCTCATGGAGTTTG  
CCGAAGAGGGCTGGGACGCGATTCCCAGGACGAACACGACGCCTGGTTCGAGCGCTTCAAGTGGTGGGGCCT  
GTACCACCAGCGCTCCGGGCAAGAGTCGTACTTCATGATGCGGATCGGGACACCCAACGGTGTTCATCGAGCCC  
GGACAGCTGGAAGTGATCGCGGAGGTCGCCGACAAGTACGCCCGCGGCCCGAGGAGAACCCGGAGTTCGGCG  
ACGCCTACTGTGACTGGACGACCCGCCAGTCGATCCAGCTCCACTGGATCAAGATCGAGGACATCCCCGAAAT  
CTTCGAACTGCTCGAATCCGTGCGTCTCTCGACCCAGCAGGCCTGTGGTACTCCTGGCGAAACATCGTCCGC  
TGTCCCGTCCCGGCAAGGACAAACACGAACACATCGACGCCTGGCCGATCGCCGAAAGACCTCCACGAGACGT  
TCAAGGGCGACGACGACTACGCGAACCTCCCGCGCAAGTGAAGGTCTCGATCACGGGCTGCGATCAGGGCTG  
TGGCCAGGGCGACATCAACGACCTCGCCTACGAGCCAGCCGAGAAGGACGGCGAACTCGGCTTCAACGTCCGC  
GTCGGCGGGCGCCTCTCCCGAAAGGAGCCCCGCTCGCGCGTGACATCGACGTCTGGGTACCCCCGAGAAGG  
CGGCCGACATCGGTACCGGATGTCCGCACTGTTCCCGGAGTACGGCGACCGCGACGACCGGTTCAACGCCCG  
CATCAAGTTCCTCATGGACGAGTGGGGTCCCGAAAAGATGCGGTGCGTCTCCAGGAGGAGTTCGTGACTTC  
GAGTTCGCGGGCCGGCGAGGACATGCGCGACACAGTACACCTACAACGCCGGGGCAACGAGCACGGCGACC  
ACGTCCGGCTCCACGAACAGCCGACGGCAACTACTACGTCCGGCTGGACGTCTCGTCCGTCCGATGGGCGT  
CGACGACGTGTACGAACTGGCCGAAATCGCCGAGGAGTACGGCTCCGCGGAGGTCCGGCTGACCCAGCGCCAG  
AACGTCATCGTACGGACGTCGACAGTGACCGCCTCGACGCGTTTCTCGACGAGCCGCTGCTGGACGACTACT  
CGCCCGATCCCCACCCGTTTCATGCGGGGCTCGATCGCCTGTACGGGGACGGAGTTCTGTTCGCTGTCGATCGT  
CGAGACGAAGAACCGACAGGTCCGCTACGCCCGCTGGCTCAAGGACAACGTCTCGCTGCCCCGAGGGCGTCCGAG  
GACTTCCACATCCACCTCTCGGGCTGTACGGCCTCTGTGCCAGCCCCAGATCGCCGACATCTCGCTGCGGG  
GCATGAAGACCCGCAAGGACGGCGAGCCGGTCCGAGGCATTCGACATCGGCCTGGGCGGGGACTCGGGGAGAA  
CCCCAGTTCGCGGACTGGGTCCGAGATGCGCGTCCCGCCGACGAAGTGCAGGGTACATCGAGAACCTCCTC  
GACGCCTTCGAGGCCGAACCGGAGGGCGACGAGACCTTCCCGGAGTTCGTCCGCGGACCGCGACGAGGAGGCC  
TACAGTCCCTGGCAGATCCCGAAGAGACGAGCTACGACGATCCGTACCTGGGCAACACGAAGATGACCTGGTA  
CCCCTACGCCGAGGACAACGACATGCAGTCTCGCCGGCACCGACCGACGCAACGACGAGCCGCTGCCGTCC  
GACGACTGA



>hxa:Halxa\_1302-Ar Ferredoxin--nitrite reductase (EC:1.7.7.1); K00366  
ferredoxin-nitrite reductase [EC:1.7.7.1] (N)

ATGAACACCGTTCGAAGAACAAGCAAGAAAAACATCCGCTGGACGTCATCGAGGACGTCTACGACTACGCGG  
AGGGGGACCTCTCCGACGAGGAGATCGAGGAACGCGCCGGCGGGCGAGTGGGAGCGGCTCAAGTGGGCCGG  
GATGTACTCCCAGAAGCAGGACGACTACTTCATGATCCGGACCAAGGTCCCAGGGCGGCTACCTCACGCCCCGAG  
CAGGCCGAGGTCATCGGGGAATGCGCCACCGACTACGCCACCGCGCCCCGAGGAGTACGGCGGGCAGGAACAGA  
ACGAGCTCTGGGGCGACGCCTTCCTCGACATCACGACCCGGCAGGACATCCAAAAGCACTGGGTTCGAGGTCTC  
GGACGTCCCCGAAATGTGGGAACGCTACGACGAGGTTCGGCCTGACGACCGTCCAGGGTGTGGCGACTCCGCT  
CGTAACGTGCTGGGCTGTCCCGCCCGGGCTCGACGACCACGAGTGTTCACCGCCAGCCGGTTCATCGACG  
CCGTTTCGGACTACTTCACCGAAAACCGCGAGTACGCCAACCTGCCGCGGAAGTTCAGATCACGATCACGGG  
CTGTGCGCACGACTGCGCTCAGTCCCAGATCAATGACGTCGGGATGACCCCGGGCGAAAAAAGAGATCGACGGC  
GAGTACTACTACGGCTTCACGTCGCGTTCGGCGGGCGGCTCTCCGACGGCCCCGGATGGCCTCCGATCTCG  
ATGTCTTCGTCACCGGAGGACGCCGTCGAGTTCGCGCGCCGTCGCCAGACGTTCAAGGAAGTGGGCGA  
CCGCAACAACCGCGGGCGTTCGCCGAATGCGCTACCTCGTCGAGCAGATGGGCGCGGACAAGTTCGAGGAAGCG  
ATCCGCGACCGCTGTACCGTCGACCTGCCACCGAGCGGCGAGGACCTGACCGTCGGCTACCGCGGGCACCAG  
TCGGCGTCCACGACCAGAAACAGGACGGCCTGAAGTACGTCGGCTTCAACGTCATCGCCGGCCGATGGGCGG  
CGACGAGTTCGCGGAGGCCCGCCGCGCCGCAAGAAGTACGGCACCGAGGACACCTCGATTTCGCTGGCCACC  
GACCAGAACTTCCTCATCACCCACATCCCCGAGGAGAACGTCGACGACCTCCTCGCGGAGCCGTTTCGCTCAGG  
AGTACAGTCCCGATCCGGGGCCGTTCTCGCGGGGCGCAGTTCGGCTGTACGGGTACCGAGTTCGTAACCTACGC  
CATCATCGAGACCAAGAAGCGCACCAAGCGCTGGGCCCCGGAACCTCGACGAGCGCATCGACACGCCCGACGAC  
CTCGAGGTTCGTCGGATGCACATGTTCGGGCTGCTCGGCCTCCTGCGCCAGCCCCAGATCGCCGATATCGGCT  
TCCGCGGGCAGACCGTCAAGCTCGAGGACGAGAACAGTCCCAATGAGGAAGGTGACAACCTCGTCGAGGGGAT  
GGACTTCGGGATCGGGCGGTGCGCTCGGGCGCCGACAACGAGTTCCTTAGACTGGATCGAGCGCGGGTGGCCGCC  
GAGGGCGTGATCCCGGCGCTCGAGCAGCTGTTTCGACGCTTACAACGAAGACCGCAACGACGGCGAGCGCTTCT  
ACGAGTGGGCCCCGTCGCGTCGACAACGAGCGACTTCGGACGCTCATGACCGACGCCGACGCGCCGGTTCGCACG  
AGGTGTTGCCCATGGAGACTGA

>hxa:Halxa\_1554-Ar Ferredoxin--nitrite reductase (EC:1.7.7.1); K00366  
ferredoxin-nitrite reductase [EC:1.7.7.1] (N)

ATGGTGCATAAGAAAGAGGAACAGAAGGAGGACTGCTACGGCGACGAGGTCCGGGAACACATCGAGGAGTTCC  
CCGAAAACGGCGGCTTCGAGGCTATCCCGGACGACGAGGTTCGACAAGTGGACCACCCGGTTCAGTTCTGGGG  
GGTCTTCCAGCAGCGCTCCGGCCAAGAGGAGTACTTCATGATGCGGCTGACCAACGCCAGCGGCATCTTAGAG  
CCGGGCCAGCTACGCCGCATCGGCGAAGTTCGCCCCGCGACTACGCGAAGGGCCCCGTCGAAAACCCCGAGTTCC  
GCAACGGCTGGATCGACCTCACGACGCGCCAGTTCGATCCAACCTGCACTGGCTCAAACCTCGAGGACATCCCCGA  
AATCTGGGAGAAACTCGAGGCTGTTCGGCGTCCACTCCCGTTCGGCCGGCGGGCGACACGATGCGCAACATCTCG  
GGCTGTCCGCTCCACGGGAAGGCCGAGGAGTTCGTCGAGTCCGGCCCCGCTGCTCGAGCGCTTCGAGGAGGAAC  
TGCGCGGGGACGACGCCCTCGCGAACATGCCCCGGAAGTTCACATCAGCGTCTCGGGCTGCCGGGTTCGGCTG  
CGCGCAGGACTCGATCAACGACATCGGGTTCGAGCCGGCGACCAAGGAGATCGACGGCGAGGAGTCCGCGGC  
TTCAACGTCCGCATCGGCGGGCGGCTTCGGCGGGCCGACGCCCGCGCGACGCCGCTTGACGTTCTCGTCC  
GCCCCGAGAACGCCTACGAGGTTCGGCCGCGGCTTCGTCGAACTCTACCACGATTACGGCAACCGCCAGAACCG  
CTCGAAGAACC GCGCGGGTTCCTCGCCGACGACTGGGGAATGGAAAAGATCCGCGAGACGCTCGAGGAGGAG  
TACGTCGACTTCGAACTGCACACTGCGGGCGAGGACTTCGCGGGCGAGTACACCTACAACGCCGGTTCGACCCC  
GCGACGAGGGGGCCCCACGACCACGTTCGGCGTTCGGCGACCAGAAGGGAGACGGCATGAAGTACGTCGGCCTGAG  
CGTCCCCATCGGCCGCTGCCGGCCGAGGACGCCATCGAACTGGCTGATCTGGCCGACGAGTACGGTTCGGGC  
GAGATCCGGCTGACCCGTCGCCAGAACCCCGTTATCGTCGACGTCCTCACGAAGAGGTTCGACGACCTGCTCG  
CGGAGCCGATCCTCGAGGAGTACCCGCCCGAACCCAGCGCGTTCGAGCGCGGGCGGATGGCCTGTACCGGCAC  
GGAGTTCGTTTCGATCGCGCTGACCGAGACGAAAGCGCGGATGGCCCCGATGCTGCGCTGGCTCAACAAGAAC  
GTCGACCTCCCCGACGACGTCGGGAAGATCAAGATGCACTACTCCGGCTGTACGGCCGACTGCGGGCCAGGCGA  
TGACCGCCGACATCGGCCTGCAGGGGATGCGCGCTCGCAAGGACGGCGAGATGGTTCGAGGCCCTTCGACATCGG  
CGTTCGGCGGGCGGCTCGGGCAGGAGCCCTCCTTCGTCGACTGGATCCAGCAGCGCATCCCGGCCGACGAGGCG  
CCCGGCGGATCCGCAACCTGCTCGAGGCCTACGCGGCCACCGCAAGGAGGGTTCAGACGTTCCGTCAGTGGG  
TCGAGGCGACGGGCCAGGAGCAGCTCATCGAGTTCGCGAACCCGAGGAGACGGACTTCGAGGCGCCGTACAT  
GGACGACGCCAAGCAGTCGTGGTACCCCTTCGCCGACAGTCCGTCGGCGGGCCGCGGCCCTCGAGGAATCGGCC  
CGCCGCTTCGACGACTGA

>nmg:Nmag\_1601-Ar Ferredoxin--nitrite reductase (EC:1.7.7.1); K00366 ferredoxin-nitrite reductase [EC:1.7.7.1] (N)

ATGCCTACTGACGTGAGGAGTGAAGGACGAGGTCTACGGCACAGACATTCGAGACCATATCGAGCGATTCCG  
CCGAAGCGGGCTGGGAGTCGATTCCGGACGACGAGAAGGACGCCTGGTTCGAGCGCTTCAAGTGGTACGGCCT  
GTACCACCAGCGCGCCGGCAGGAGTCGTACTTCATGATGCGGATCGGGCCACCGAGCGGCTACTCGAGCCG  
GGCAGTTCCGTGCGATCGTCGAGATTGCAGACGAGTACGCCCGCGTCCGGTTTCGAATCCCGAGTTCGGCA  
ACGGCTGGCTCGACGTAACGACGCGTCAGGCGATCCAGCTCCACTGGATTTCGAATCGAGGACGTGCCCGGTAT  
TTTCGAGGCACTCGAGGACGTGGGCTCTCGACGGTCCAGGCCTGCGGTGACTCCTGGCGGAATATCGTCGGC  
TGCCCGGTGCGTGGGAAGGACAAACACGAGCACGTGATGCTGCCCGCTCGCGGACGACCTCCACGATACGT  
TCAAAACGAACGATGCGCACTCGAACCTGCCCCGCAAGTGAAGGTCTCTGTGACGGCTGTGACGAGGGCTG  
TGGCAGGGTGACATCAACGACCTGGCGTTCGAGCCAGCCGAGAAGGAGATTGATGGCGAGACCGTACGGGC  
TACAACGTCCGCGTCGGCGGCGACTGGCGCGCAACGAGCCTCGGTTTGCGAAGAACATCGATGTCTTCGTGA  
CGCCCGAGCAGGCCGTTGACGTGCTGGCGGTATCTCGGCGCTCTTCCGCGATCACGGAGACCGCGAGAACCG  
CTACAACGCGCGCATGAAGTTCCTCGTCGACGAGTGGGGCCAGAGAAGTCCGCAACGTCTCCAGGGAGAG  
TACATCGACTTCGAACTCGAGACGGCCGGCGAGGATCTGCGTCACTCCTACAGCTACAACGTGGTACGCGG  
ACGGCAAACACGACCACGTTGGCGTCCACGAGCAGGACGACGGCACCACACTACATCGGACTGAACGTCTCGT  
GGGACGTCTCGGAATCGACGACGGCTACGAGATCGCCGACGCGGCCGAAGAACACGCCTCCGGTGAGGTTCCG  
CTGACCCAGCGCCAGAACATCATCCTGACGGACGTGCCGACGAGGAGGTGACGCGCTGCTCGACAATCCGG  
TCTTCGACGAGTATAGCCCGATCCACACCCGTTCCAGCGAGGCTCGATCGCCTGTACCGGCAGCGAGTCTG  
TTCGCTTTCGATTGTGCGAGACGAAGAACCAGGTCGCTTCTCGCGCTGGCTGGTTCGACAACGTCTCGCTT  
CCTGAGGGCGTCGAGAATTTCCACATCCATCTCTCTGGGTGTACGGCATCCTGTGCCAGCCCAGATTGCCG  
ATGTCTCCCTGCGGGGTATGAAGACCCGCAAGGACGGCGAACCGGTGAGGGCGCTCGACATCGGCCTCGGCGG  
CGGCCTCGGCGAGAATCCGCAGTTTGCCTCCTGGGTGTGCGACCGCTGCCTGCTGACGAAGTCCCGGGTGG  
ATTGAGAATCTGCTCGCCAATTTGACGACGCGCGTGAAGACGGTGAAGACTTCCGCGAGTTCGTTGCCGCTC  
GCGACGACGAGGTACTGGCTGATCTCGTCGAGCCGAGGAGACGAGCTACGAGGATCCGTTCCCTGCACAACAC  
CAAGCGAACCTGGTATCCCTACGCGGAGGACGACGGATTTCGACGCCAGTCTGACCTGCCCGTGGCGACGGG  
ACGCCGATTCCATCGGACGACTGA

>hje:HacjB3\_01275-Ar ferredoxin--nitrite reductase; K00366 ferredoxin-nitrite reductase [EC:1.7.7.1] (N)

GTGGCGCCTGAGATCGAACAGTGGAAAGACGACTGTTACGGCGAGGAGCTGCGCGGGAAGATCCTCGAGTTCC  
CGGCGGGCGGCTGGGAGACGATCCCCGAGGGGGAACGCAAGAAGTGGTTCTCGCTGTTCAAACACTGGGGGGT  
CTTCCACCAGCGCGACGGCCAGGAGAGCTACTTCATGCTGCGCCTGCAGAACGCCGGCGGCTGTTGCGCCCC  
GGCAGTTGCGCGCGATCGGCGAGGTCGCCCCGCGACTACGCGACCGGCCCCCGCGAGAACCCTGAGTTCGGCA  
ACGGCTTTCTCGACCTGACGACCCGCCAGTCGGTCCAGCTGCACCTGGATCAAGCTCGAGGACGTCCCCGCGAT  
CTGGGAGAACTCGAATCGGTTGGCGTCTCCTCCCGATCGTCGGGGGGCGACTCGATGCGCAACATGGCCGGC  
TGCCCGGTGCGCGGGCTCGACGCCGAGGAATTCATCGACTCGCGGGACCTGCTCGAACGGCTGAATACCGACC  
TGCGCGAGGACGATACTCTCGCAAACCTCCCTCGGAAGTTCACGTCTCGGTGACGGGCTGTCGGGAGGGCTG  
TGCCCAGGACTCGATCAACGACATCGGGCTCGAACCCGCCGAGAAAGGCAGAACGAAAGGCTACAACGTCCGG  
GTCGGCGGGCGGTCTCGGAGGGAGACAGCCCCGGGAAGCCCGTTCGCTCGACGTGTTTCGTCACGCCCGAGGAGG  
CTACGACGTGGTTCGAGGTTTCGTCGAACTGTATCAGGAACGCGGCCAGCGCGAGAACCGCCAGAAGTCCCG  
CTCGCGCTTTTTTCGTCGACGACTGGGGCGTCGAGGAGATCCGTGCGACCCCTCCAAGCGGAGTACGTCGAGTTC  
GCGTCCGGACCGCGGGCGGGACCTCCGCGAGGAGTACACCTATAACGCCGGGACCTGTCGCGGGCGGCGACC  
ACGTGCGCGTCCACGAGCAGAAAAACGGCGAGTACTACGTGGGTCTGAGCGTCCCGGTTCGGTTCGCTGCGCGC  
GAAGGAGGCCATCGCGATCGCGAACTGCGCGAGCGAGTACGGAAGCGGGGAGGTACGCCCTGAGCCGCCGGCAG  
AATCCCCTGATCATGGACGTTCCCGAGGCCGATCTCGACCCGTTGCTCTCCGAACCGGTACTGGAGACCCACA  
CGCCCAGCCCCACCCGTTCCAGCGCGGGTCGATCGCCTGTACGGGCACCGAGTTCGCCCCTGGCGCTGAC  
CGAGACGAAAGCCCGTTTGGCGCGAACGATCCGCTGGCTGCGCGGAACTGCGACCTCCCTGACGACGTGAGG  
GACATTCATATTCATACTCGGGCTGTACGGCCGACTGTGGGCAGGCGCTCACCGCCGACATCGGTCTGCAGG  
GCATGCGCGCACGCAAGAACGGCGAGATGGTTCGAGGCGCTGGATATCGGCGTGGCGGGCGGAATCGGGGAAAA  
CCCCCTGTTTCATCGAGTGGATCCACCAGCGCGTCCCCGCCGACGAGGCACCGATGGTGTCAAGAACTCGTTC  
GAGGCCTACGGCGCCACCGCTCTCCGGGCCAGTCTTTCGCGAGTGGGTTCGAAAACACAGGCGTTCGAGAGCC  
TCGTCGAACTCGCCGAACCCGAGGAGAGTTCTACGAGGACCCGTGGATGGACGACGCGAAGGGGTTCGTTGTA  
CCCCTTTCGCGGAAGGCGAGAGCCCCGCCCGACGGCCGCCGACGGCACCCCGATCTCCGCTGACGACTGA

>pai:PAE2577-Ar ferredoxin-nitrite reductase; K00366 ferredoxin-nitrite reductase [EC:1.7.7.1] (N)  
ATGAGCTGGGAGGAGGTCTACAAGAAGAATTTAATAGAGAAAATTAACGGGACAAACATCCCTTTAAATTAC  
TTGAGGAGCTGGAAACCTTGGCTAGGCGCCACTACAGCGATATACCCGAAGAGGAGTTTATCAGGTTATACTG  
GCTAGGGGTAGTACATGATAGGCCTAGGACCGGGTATCTCATGTTACGCCTTAGGATACCTGGTGGTATTTTA  
AAACCGCATCAATTGCGGAGAATTGGGGAATTGTCTTATAAATATGGCAAGAATTACGCCGAGATAACTGTTA  
GACAAGACATCCAGTTACACTGGATAGAGCTTAAGTACCTTCCAGAAGTACTTGCTCAGTTAAAAGATGTGGG  
GATTTTAACTATAGGAACAGAGGGGGATACGGTAAGGAATATAACCACTTGCCCTCTGGCAGGCCTTACCGTT  
AATGAGTTGTTTGGATGTTAGAGATGATGTATATAAAATAGATAAGGCCTTTCTCTTGGATCCCATATATGCTG  
ATTTACCCAGGAAGTTTAAAATCACAATCACCGCGTGTCTTATATGTGCAGCGTACCCGAAATTCAAGATTT  
AGCTTTGATAGGAGTCAACAAAGACGGCAAATACGGTTATACAGTACTGATTGGCGGGCGGTCTCTCTGCGG  
CCTCGTGTAGGAAGGCATATGCCAGTATTTGTGCCTAGAGAAATGGTTATTGAGTTTGTAAAAGCTGTATTAG  
ATGTCTGGAGAGAAGAGCCTAGATATCGTCTCTCCCGTGTAGAGCTAGAATTAAGTTTATGATCGACGATCT  
TGGGGTAGATAAGTTCAGAGAGCTTGTAGAAAATCGATTAGGTCAAAGGCTGGAAGATTATCCTTCTAAGCCT  
GAGTCTCTGGGCAAGACCGATCATATAGGGGTAGAACGGCTTAAAGACGGCACATATGCTGTCCGAGTTGCCA  
TACCAGCAGGGATAGTGACAGGGGAGTCTTGATAAAGCTTGCAGATTTAGCAGAAGCTGTGGGAGTCAAGGA  
AGTGAGGCTGACGCAACGTCAGAATTTAATTCTAGCAGGCGTCCCGGAGGACAAGGTTGAGATCGTGAAGAG  
TTTTGCCAGAAGTGGGGTTATGCTGTAGAACAGACGCCCTTGTGGCCATGTCTGTGGCTTGCCTGGAGATC  
CCTATTGTAATTAATCTATTTCCGACACGAAGGGACTTCTACTTGAATTAATAAAAAGCTTGAAGAGAGATT  
CGGCGAAATACAGGATCTTCCCTCTATACATATTGTGGGCTGTCCACACGCTTGTGCATGGTATTGGATTGGG  
AACATAGGCCTTATGGCCACCACGGCTAAAATGCCTGATGGAAGGTTTGTAAAGCGTATGATGTCTTAGTAG  
GAGGGGATTATGGTAAAAGGACCGCCATAGGCAAAGTATTGTTTAAAAAAGTGCCTGCAGATAAGATTAAGGA  
CTGCATAACTTACCTTGTGTAATATTACATCAATAAGCGGGCACCAGGTGAGGACTTTCCTACCTTCATTGCT  
AGAATAGACTTAAGAGAAGTACTGATTACATATCGGGTAAACTAGGAGTACAATTAGCGCTGGGAAAATGA

>tba:TERMP\_00352-Ar NADH oxidase/nitrite reductase; K00362 nitrite reductase (NAD(P)H) large subunit [EC:1.7.1.4] (N)  
ATGAACTTTTAAATAGTCGGAAACGGCATTGCCGGAGTCAAGCTGGCAAAGAGCTGTCTAATGACTTCGATA  
TTACAATAATCGACAGAGAAAACATACCATATTACAGCAAGCCCATGCTGAGTCATTACATAGCTGGTTTTGT  
TGATGAAAAGTCGCTCTTTCCCTATTCTTTTACTGTTGATGAAAAGAAGAGCATAGAGCTGAAGCTGGGAGCT  
GACGCCAAGGTGATAGACAGGGCAAGGAAAAGGGTATGACCTCAGAGGGGAGAACTTACTATGACATTCTTG  
TTCTTGCAACGGGAGCAAGGGCAAGGGAGCCCATGGTAGAAGGCAGGGAGCACTTAAATGTATTGAGAACT  
TGAAGATGCAAGGGCAATAAAAGAGATCCTTGAGCGAGAAGGAGATGCAGTAATTTCTGGGGGGAGGATTTATA  
GCCTTGAGCTTGCTGGAAATCTTGCGAAAGCAGGTTATGATGTAAAGCTCATTACAGGAGGAATACCCTCC  
TTGGTCTCGATGAAGAGCTGAGCAGAATATTGAAAAAAGGCTTGAAGATGTGGGGGTGAGTTTTATCTCAA  
CACGAATTTGGTAAAGGCTGACGAGCGTGAATCCTTACAGATAGAGGATACGTAGAAGGGAAAGCTCAAAGTG  
TGTGCTTTTGGTATAATAACCAATAGAGAAATTGCAGTGAAGGAGTGAATACACGCTGGAAGGGGTATTCTGA  
TAGATGATAGATTGAGAACATCCGCAAAGACATCTATGCAATAGGGGACTGTGCAGAGTACAACGGCATAAT  
TTGCGGAACTGCCAGAGCTTCCATGGAACATGCAAAGGTTCTGGCAAACCTGCTTCGTGGAAGAGATGACAAG  
TATGACTTTGAATTTCTGTTCCCTCAATTTTCAAGCTTGCCTGGCTTTTCCGTGGCAATCATTTGGTAAGATTGGTG  
GTTATGGCAGATGGATAGATGAAAACATCAAATCTTCAATGATCATCGAGAGAAAATCATTTGGGGCAGTAGT  
TCTTGACGACTTAAGATCCGCTACGAAGCTTGAGAACTCATCAAGAGTGGGGCAGAGTATAATGACCTCCTG  
TGA

>ton:TON\_0865-Ar NAD(P)H:rubredoxin oxidoreductase; K00362 nitrite reductase (NAD(P)H) large subunit [EC:1.7.1.4] (N)  
GTGAGGGTTGTAATAGTCGGCGATGGGCCTGGAGGAGTTGAACTTGCTAAGAGACTCTCTGGGGACTTTGAAG  
TAACAATAGTGGACAAAGAAGGTCTCCCTTACTACTCAAAGCCGATGCTGAGCCACTACATAGCAGGATTTGT  
GGATGAAAAGGCTCTTTTCCGTATTCAGCCGAATGGTACGAGCGGAAGGGGATAGACCTCAGATTAGGCGTT  
GAAGCCAAGATCATAGACAGAGCGAGGAATGTTCTCGTACGAGCAAGGGGAATATTCCTATGATGTCTCTCG  
TTCTTGCGACTGGCGCAAGGGCAAGAGAGCCTTCATACCCGGGAGGGAGCACATCTGACCTAAGAACCTT  
TGACGACGCCAAGATGATAAAGGAAAGGCTTGAAGGAGAGGGAGAGATCACGGTCTTGGCGGGCGGCTTCATA  
GGGCTTGAGCTGGCCGGGAATGTGGCCAAGGCAGGCTATCTGTCAAGCTTATCCACAGGAGCAAGAATCTCC  
TCAGACTGGACGAGGAGCTGAGCGAAAAGCTCCAGGAAAAGCTGGAGGAGGTGGGAGTTGGGTTCCACCTCGA

GGCCAACCTCCTGAAGGCCGATAAGAACGGTGTGGAGACCGATAAGGGGTACATCCCCGGGAGGCTTAAGGTC  
TGCGCCTTCGGGGTAGTTCCCAACAAGGAGCTAGCTTTGAGGAGCGGAATCCACGCTGGGCGTGGAATATTTA  
TAGATGCAGGGTTAAGAACCTCTGCGAAGGACATCTACGCAATAGGTGACTGCGCCGAGTACAGCGGGACGAT  
ATGCGGGACTGCCAAAACCTGCTGTAGAGCACGCAAAGATCCTCGCAAACCTGCTCAGGGAGCAGGATAACCAC  
TACGACTTCTCCTTCTGCTCGGCGCTCTTTAAGTTTCGCCGACTTAAACGTTGCATTGATTGGAAGAACAAAGG  
GAGAAGGCAGGTGGCTTGATGAAAAACGAAAGTTTTCTACAAAGATGAAAAGCCCATTTGGGGCAGTTGTGCT  
CGGAGACGTAAGGAGAGCCATGGAGGTCGAGAAAGCAATCAGAGAAGGACTGCTTATTGACTGA  
>tsi:TSIB\_1897-Ar NAD(P)H:rubredoxin oxidoreductase; K00362 nitrite  
reductase (NAD(P)H) large subunit [EC:1.7.1.4] (N)  
ATGAGAATTGTTATAGTTGGGAACGGACCCGGAGGAGTGAATTAGCTAATCAGCTTTCTGGGAACACAAGG  
TAACGATAGTTGAACGTGAGAACGTTCTTACATTACAGCAAACCAATGTTGAGCCATTATATAGCGGGGTTTGT  
TGAGAAGGAAAAGCTCTTCCATACTCTTTCTCTTGGTACGAAAAGAAGGGGATAGACCTTAATCTGGGAGTA  
AAAGCCGAAGTAATAGATAGGGCCAGAAAAGGTTGATAACAAGCGATGGCGAGATCCCTTACGATGTATTGG  
TTATAGCTACAGGAGCTAGGCCAAGGGGACCTACCTTTGAAGGCAAAGAGTTTGTGCAAACCTCTCAGGACGCT  
CCAAGACGCTGAAAGAATTAAGGAGCAAATAGAAAATAACAAAGATGCCTTAATATTGGGAGGAGGATTTATA  
GGGCTTGAGCTTGTGGCAAATCTTGGCAAAGCGGGCTATAGAGTGAGGCTCGTTCATAGGGGAAGTAATCTTC  
TTGGGCTTGACGAAGAGCTAACAAAGGCCATAATGGAAAAGCTCGAAGGATATGGTGTGAAATTTTATCTCGA  
CGCAAACACTCTTAAAGCAGATGAGAACGGCATCTTTACAGATAAGGGGTACGTAGAAGGCAAAGTTAAGATA  
TGTGCCTTTGGAGTTATCCCCAACAAAGGAAATAGCCGTTAAAGGCGGCATTACGCTGGAAGAGGCATACTAA  
TCGATGACCATTTTAGAACTTCAGCTAAAGATGTATATGCCATTGGAGACTGTGCCGAGTACAATGGGATAAT  
TGGAGGTACTGCAAAGCTGCCATGGAGCATGCAAGGTTCTTGGCAAACATTTTGGAGGGTAAGGAGGATAGC  
TACGACTTCGAATTCGCTCCACGGTTTTCAAATTTGGCGACATTCAGTTGCACTAATAGGGAAAACAAAAG  
GAGAGGGAAAATGGTTTTGATGAGAAAACAAAATTTTCTTGAAGGAGAGAAAGTCATTGGTGTGTTGTTAT  
AGAAGACGTAAGAAAGGCAATGATGCTGGAGAAAAGGCAAAGCTGGGGTTAGCATAGATGAATTATAA

>hhi:HAH\_1235-Ar nosZ; nitrous-oxide reductase (EC:1.7.2.4); K00376  
nitrous-oxide reductase [EC:1.7.2.4] (N)  
ATGAGCAAAAACGAAACCCACGCGATCCGAACGAAGTCCCTCGAAGAGTACGAAGAAAACCCCTCGACTCGGTAC  
TGGTGGAGGTTCGAGTCTCCGGACGAATCGACTGCGGACGACGACCTCTCGCTGGGACTGCCGGCCCTCTCGCT  
CGGCCGCCGGGACTTCATGAAGGCCGGCGTCCGCCCGGTGCGATGGGGTCCGTGCTGGCTGTTTACGCGCTG  
ACCGGCCGGTGGCGATGGCAGTGCAGGACGACCCCTCGGGCAGCGGCGGAGCCACACGGTTCGAAC  
CGGGCGAACACGACGAATACTACGGCTTCTGGTCCGGCGGCCACTCCGGCGAACTGCGGGTTCATCGGCATCCC  
GTGATGCGGGAGCTCACCCGCATTCCGGTGTTCACACCGACTGTGCGTCCGGCTATGGGTTCACTGACGGG  
ACTCAGGAAATGCTGGAAGAGGGCGGGCGGTATAGCTGGGGTGACAATCACCACCCGAACCTCTCGGAGACGG  
ACGGTACTACGACGGCGAATACCTGTACGTCAACGACAAGGCCAACGGCCGCATCGCCCGTGTGAACCTCAC  
GTATTTGAGACGGACGCCATCACGGACGTCCCGAACATGCAGGCCATCCACGGCTGTTGTGTCTCTCGCCG  
GACACGAAGTATGTGCTGGGCAACGGCGAGTTCGCGTGCAGGACGCGGACCGGACGCGAAGAACC  
CGGACAACACTACGCTCGCTGTTGTCGCGGTCGACCCCGAGTGCATGGAGACCCAGTGGCAGGTCAAAGTCGA  
CGGGAACCTCGACATCGTGCACACCGGCAAAGAGGGTCCGTGGGCCATCTCCTCGGGCTACAACAGCGAGGAG  
GCCACCGACATCCAGGGCATGACGAAAGACGACCGGGACAACGTCAAGGCGTTTCGACATTCGGGCCATCGAGC  
AGGCCGTGAGAACGGCAACTACGAGGAGGTCAACGGCATCCCCGTGCTCGACGGCACGAGGGGAGTTTCGCT  
CAACCAGGGCGACCGCCCCATCGTGAAGTACATTCGACGCGGAAAAGCCCCACTGTGTCGAGGTTCGGCCCG  
AACGGCGACTACGCTTCGTCGCGGGGAAGCTCTCGCCGACGGTGACGATGATCGACCTGAACGCGCTGGCCG  
ATTCCTCCGACCCCGAAGATGTCGTGCGCGGGCGACCACGCGTCGGACTCGGCCCGCTACACACTACCTTCGA  
CGGCAACGGACACGCCTACACGTGCTGTTTATCGACTCACAGGCGTCAAGTGGGACATCGAGGCGGCGGTC  
GAGGCCGAAGAAGGGTCCGAGGACCCCATCATCGAGAAGCAGGACGTCCACTACAACCCCGGGCACATTCAGG  
CCCTCGAGGCGATGACGACCGACCCCGACGGGGAGTGGCTCGTCAGCCTCAACAACTCTCCAAGGACCGGTT  
CTCCCGGTTCGGCCCGATATGCCCCGACAACGACCAGCTCATCCACATCGGGCAGGGCGAGGAGGAGATGGAA  
CTGGTTCGCGGACACCCGGCTACCCCGAGCCACACGACTGCGTGTTCGCCCACAAGGACAAGATAGACGCCA  
AGAAGTCTACGACAAGGACGACTACGAGGAGACCTACATCACCGAGGAGGACTCCGGCGTTCGAGCGCACGGG  
CGAGAACAGCGTCCACGTCAAATGACGACCAAGCGCTCGGAGTTCGGCCTGCCGGACTTCACGGTTCAGGAG  
GGCGACGAGGTGAAACTCTCCACGACCAACATCGAGGGGTACAGGACATCATCCACGGCGTTGCCATCCCCG  
AGCACGACATCAACTACCCGTGGCCCCACAGGACACCCGCGAAGTCACGTTACGGCTGACGACCCCGGGGT

GTACTGGATCTACTGCACGTACTTCTGTAGCGCCCTGCACCTTGAGATGCGCAGCCGGATGATCGTCGAACCG  
GCGGAGGGGTAG

>hma:rrnAC0390-Ar nosZ; nitrous-oxide reductase; K00376 nitrous-oxide  
reductase [EC:1.7.2.4] (N)

ATGAGTAAGCACGAAACCCACGCGACCCGAACGAAGTCCTCGAAGAGTACGAAGAAACGCTCGACTCGGTGC  
TGGCGGAGGTTCGAGTCCCCGATGAGGCGACAACGGATGACGACATCTCCCTGGGACTACCCGGCCTTTCGCT  
CGGTCCCGGGACTTCATGAAAGCCGGCGTCGCCGCCGGTTCGATGGGGTTCGGTGGCCGGCTGTTTCAGCGTTG  
AGCGGCGGCGACAGCAGCGCTGGCAGCCAGTCAACGCCCTCGAGCAGCGGTGCGAGTACACGGTTCGAGCCGG  
GCGAACACGACGAGTACTACGGCTTCTGGTCCGGCGGCCACTCTGGCGAACTGCGGGTTCATCGGCATCCCGTC  
GATGCGTGAACCTACCCGATTCGGGTGTTCAACACCGACTGTGCGTTCGGGCTATGGCTTCACCGACGGCAGC  
CAGGAGATGCTGGAGGAAGGCGGTGGCTACAGCTGGGGTGACAACCACCACCCGAACCTCTCGGAGACGGACG  
GCGACTACGATGGCGAGTATCTGTACGTCAACGACAAGGCCAATGGCCGCATCGCCCGCTGAACCTCACGTA  
CTTCGAGACGGACGCAATCACTGACGTCCCGAACATGCAGGCCATCCACGGGTGCTGTGTCCTTTCGCCAGAC  
ACGAAGTACGTACTGGGCAACGGCGAGTTCGGCGCGCCGCTGCCAAACGATGGGACCGACGCGAAGAACC  
ACAACCTACACGTTCGCTGTTTCGTCGCCGTCGACCCCGACTCGATGGAGACCCAGTGGCAGGTCAAAGTCGACGG  
GAACCTCGACATCGTCGACACCGGCAAAGAAGGTCGGTGGGCCATCTCCTCGGCGTACAACAGCGAGGAGGCC  
ACCGACATTCAGGGCATGACGAAGGACGACCGGGACAACGTCAAGGCCTTCGACATCCCGGCTATTGAGCAGG  
CTGTGAGAACGGCAACTACGAGGAGGTCAACGGCATCCCGCTCGTCGACGGCAGCAGGGAAGTTCGCTCAA  
CCAGGGCGACCGCCCGTTCGTAAGTACATTCCGACGCCGAAAAGCCCCACTGCGTCGAGGTTCGGGCCGAAC  
GGCGACTACGCTTTCATCGCGGGGAAGCTCTCCCGACGGTTCGATGCTCGACCTGAACGCGCTGGCCGACT  
CCTCCGACCCCGATGAGGTGTCGCCGGGCGACCGCGTGTGGGCTCGGCCCGCTTCACACCACCTTCGATGG  
GAACGGGCACGCCTACACGTTCGCTGTTTCATCGACTCTCAGACAGTCAAATGGGACATTCAGGCCCGCGTTCGAG  
GCCGAAGAAGGGTCCGAGGACTCCATCATCGAGAAGCAGGACGTCCACTACAACCCGGGCCACATTCAGGCC  
TTGAGGCGATGACGACCGACCCGGACGGAGAGTGGCTCGTCAGCCTCAACAAGCTCTCGAAAGACCGGTTCT  
CCCGTTCGGCCCATCATGCCGATAACGACAGCTTATCCACATCGGGCAAGGTGAAAAAGAGATGGAACCTG  
GTCCGGACCATCCGGCCTACCCCGAGCCACACGACTGCGTGTTCGCCCACAAAGACAAGATAGACGCCAAGA  
AGGTCTACGACAAGGACGACTACGAGGAGACCTACATTACCGAGGAGGACTCGGGTTCGAGCGCACGGGCGA  
GAACAGCGTCCACGTCAAGATGACGACCAAGCGCTCGGAGTTCGGCCTGCCGGACTTCACGGTTCAGGAGGGC  
GACGAGGTGAAACTGTCCACGACCAACATCGAGGGCGTACAGGACATCATCCACGGCGTTCGCATCCCGGAGC  
ACGACATCAATTACGCCGTGGCGCCACAGGACACCCGGGAGGTACGTTACCGCTGACGACCCCGCGGTGTA  
CTGGATCTACTGCACGTACTTCTGTAGCGCCCTGCACCTTGAGATGCGCAGCCGGATGATCGTCGAACCGGCG  
GAGGGGTAG

>hbo:Hbor\_30430-Ar nitrous oxide reductase apoprotein (EC:1.7.99.6);  
K00376 nitrous-oxide reductase [EC:1.7.2.4] (N)

ATGAGTTCACACGACACATCGGAGGGGGAGGAGACCGACACCAAACAGAGCGTAGCGCAGAGACATTACTAT  
CGGAACACGAGGCGCAGTTGAATGCGCTTATTGACAGACGTACAGGGGCCGGACGCGGACCCAGTAGAGACGCA  
ACTTCCGAATCTCGGTCTTGGTCTCGGTTCGCCGGGACTTCATGAAAGCGGGGGCAGCCGTCGGGGTTCGGGC  
TCCGTCCCGGGTGTGACGGGCGAGGGCGACAGCCAGGGTGGTACAGCCACGCCGCTCTTCGAGTTCACGGCGATG  
TGCCCGACCACTTCGTTCCGCCGGGCGAACACGACAAGTACTACGGCTTCTGGAGTGGCGGTCACTCCGGCGA  
AGTGAGAGTAATGGGAATTCGTCGATGCGGGAACCTCACGCGAATCCCGTGTTCACAGGGAGTGCAGCGAAG  
GGATACGGTTTTCGACGACGGAACGGGGGAGATGCTTAAAGACGCAGGCGACTACACGTGGGGTACTCTCACC  
ACCCGAGCTTATCCGAGACCGATGGGAAGTACGACGGCGAGTACCTATTCGTCAACGACAAAGCCAACGGCCG  
CGTCGCACGGGTGAATCTGAAGTACTTCGAGACGGATGCGATTCTGGACGTGCCGAACGTCCAGTCACTCCAC  
GGATGCTGCATTACAGAGCCCCGACACCGAGTACGTCTTCGCCAACGGTGGAGTTCGGTGCAGCGCTTCCAAACG  
ACGGGCGCGACGTAGACGACCCGTCGAAGTACGTCTCGCTGTTTTTCGGCCATCGACCCCGAAAGCATGGACGT  
ACTCTGGCAGGTGAAAGTCAGCGGCAACCTCGACATCGCCGACTCCGACAAAGACGGCCGGTGGCTGCTCTCG  
TCGTGCTACAACGACGAAGAGGGGGTCAAATCGAGGAGATGACCCGCGACGACCCGCGACTCGGTGAAGGCGT  
TCGACGTACCAGCCATTCAGAAAGCGGTTGATGCCGGGAAGTACGAGGAGGTCAACGGCGTCCCGTTCGTCGA  
TGGGACCCGTGAAAGTTCACTCAACAAGGGCGATAACCCACTCGTCCGCTACATCCCGACGCGGAAATCACCC  
CACTGCGTTGAGGTGACGCCGGACGGAAGTACGGCATCGTCGCCGAAAGCTCTCTCCGACCGTCTCGATCA  
TCGATATCGAGAACTCGGAACCGAACCCGACCCGGCGAAGACGATTGTCCGGCCAGCCCAAACCTCGGTCTCGG  
TCCACTGCACACTACGTACGACGACCGCGGTACCGGTACACCTCGCTGTTTCATCGACTCGCAGGTTCGTCAG  
TGGGATATCGAAAAGGACGTTGGAGTACCAAAGGCTCCGAGGAGGCCATTCTCGGGAAGATAGACGTCCACT  
ACAACCCAGGACACATCCAAGCGGTACAGGCAATGTCCGTGCAACCGACCGGCGATTGGCTCGTCTCTCAA

CAAACGTGTCGAAGGACCGGTTCCCTCCCAGTCGGACCGATTACCCCGACAACGACCAACTCATCTACATCGGA  
AACGACAAAGACAACGAAACCGGTGGAATGGAAGTGGTTTCCGATCACCCCGTCTATCCCGAACCGCACGACG  
CCATCATGGTCCACAAAGACAAGTTGGACCCGGCGAAGATATGGGATGCCAAGGACTACGAGGGAGAACGGGA  
GTACATCTCCGAGAAGAACTCGGGAATCGAACGCCTCGACGACTCGACCGTTCGAGGTGAACATGAGTTCCAAG  
CGGAGCGAGTTCGGCCTCCGTGAATTCACGGTGAAGAAGGGCGACGAAGTGCAGATGACCGTGACGAACATCG  
AGAAGAGTCCGGACATCATCCACGGAGTTGCCATCCCCGAACACGACATCAACCTCGCGCTCGCCCCACAGGA  
CACTCGGGAAGTAACGTTCCGCCGGATGATCCCCGGCTACTGGATCTACTGCACGTACTTCTGTAGCGCA  
CTGCACCTAGAGATGCGCTCGCGGATGATCGTCAACCACGGGACTGA

>fpl:Ferp\_0128-Ar nitrous-oxide reductase (EC:1.7.99.6); K00376 nitrous-  
oxide reductase [EC:1.7.2.4] (N)

ATGGCGGAGGAGAAGAATGCGAAAAAGAACAACAAGAGAAACAATAAAAAACGGGGAGACTAAATTAACAAGAA  
GAGAATTTCTTAGCTTCGGAGGAGTTTTATCGCTGGATTTGCCGTTGGAGCTGGAATTTGAGGCTTGGTGG  
AGGAGGAGCACCAGCAGCTCCAGCCTCTTTTGCTGAAATAATGGAGCAGAGAGGGTTGACGCAGCAGGATGCT  
ATTGCCGCTTTAAAAACCTACACTCCCGGAGGAAAGTACGACGAGTTCATAATGTTTGCCTCTGGAGGACATT  
CTGGGCAGGTGCTCGTAATCGGAGTTCGAGCATGAGATTGTACAAAGTAATAGCCGTATTCACCCAGAGCC  
TTGGCAGGGATACGGATATGGACTGAAGGAAACCCATGAAGTTCCTTAAAGGAGGGTATAACGGAATTCGCCCA  
TTGAGCTGGGGAGACACTCATCCTGAAATCAGCAGAACCAATGCTGAGTTTGACGGAGAATGGCTGTTTTA  
TTAACGATAAAGCAAACGGCAGAGCTGCTGTTATAAGCCTCAAGGACTTCGAGACGAAACAAATAGTAAAAGT  
TCCGAACACTCAAACAGTCCACGGAGGGTGTCTTGCCTCCAAATACTGAATACGTTGCAATTTGTAGCCAA  
TATGCAACCCCATGGGATCCTGAAAAGGAGGATACATCCCCGAGAAACGTATGTTGAGTTGACTGAGGAGA  
ACTACAAGAAGTACTTCAGAGGAACCTTACACGTTTTTGGCTTTCGACAGAAAGAGGGGAAGATTCGACCTATC  
AAAGAGCTTCAGATAGAGCTTCCCTCCGTACACGCAGGATCTTGTAGCTGTAGGATGGGGTCCGAGCGATGGT  
TTGGCTTTCTGCAACTCTTCAACACCGAGTTGGCTGTTGGAGGTGTCTTAAAAGGAAAACCTCCACTTGAGA  
TTGGAATGTCCAGAACGATTTGACTATCTTACGTAATTTCTGTGGAAGAAGGCTGAGCAGTACGTTAAGGA  
AGGAGGAGGAGAAGTGATAAACGGGATAAGAGTAATAAGGTTGAAGGAGGCTGTTAAGGAGGGGCTGATTTAC  
TTTGTTCGCCAACCAAAAGCCCCACGGATGTGATATAACGCCGAACGGAGATTACGTTTGTGTGTCAGTGGA  
AGCTCGATCCCCTGTGACAGTCTATAGCGTGGAGAAGATAAAAAGGGCTATCGAAGAGAAGAAGTTCGAAAA  
GAAAGATCCCTACGGTGTTCAGTTTTGAAGTTTTGACGAAGTTGTTGAGGCTCAGATAGAGGTTGGTTTTAGGT  
CCTCTCCACACAGAATTCGACGATAAAGGCTATGCTTACACAAGCCTCTTCATAGACAACGCTGTAGCAAGAT  
GGAAGCTTGGTCCACCCTACAACGAAGATGGATGGAAAAGTTGTTGAAAGAATTTCCATAAACTACAACGTTGG  
ACATCTGGCAACTCCGGAGAGTAACCTCTCCGACGCCAAAAGGAAAGTATCTCGTTTCCCTAAACAAGTGGTGC  
ATCGAAAGATTTCCCGCTTGTCCGTTCCACTGCATCCGCAGAACCTCCAGTTAATTGACATAAGTGGGGAGAGAA  
TGCAGCTCCTTTACGACATGCCATAGGACTTGGTGAACCTCACTATGCGAAGATAATCAGCATCGAGAACT  
TAAGCCACTCGATGTTTACCCAGCTGGAAGTACCCCGCTTACCTTCCAGCCACATCCGAAGGCAATACAGCAG  
GGACAGGAGAGAATTGAGAGAAAGCAGGAGAACGGAAAAGTGGGTTACTGAGATTTATGCTACATTAATCAGAA  
GTACCATAACTCCTGACATAATGAAAGCCAAAGTGGGAGACATCGTGAGAATTTATCTGACGAACGTTGAATA  
CACGAGAGATGCAACACATGGATTCTGTATCGCAGAGTACAACATAAACGCGAGTCTTGAGCCGGGAGAGACT  
GGAACGATAGAGTTGTTGCGGACAAGCCAGGAGTTTATGCGATCTACTGTACGGAGTCTGTTCCACCACTCC  
ACCTGGAAATGGCCGGTTGGTTAGTAATTGAACCATAA

>hla:Hlac\_1165-Ar nitrous-oxide reductase (EC:1.7.99.6); K00376 nitrous-  
oxide reductase [EC:1.7.2.4] (N)

ATGACTACAGATCCGAACGCGAGCGACGAGCGGACGGCACGGACCGACGAACAACGCGACGAGCAGTCGGCGA  
ACGCGAATGCGGGCGACGCGAAGACAGCGGGATCGGCCGCGGACGGCACCGGAGACGGCGGACGCGGTCCGGA  
GATCGTTCGACGGCCGGACGATCGAACACTTGTGACCGATCACGAACGCGACATCGCCGCCACCGCGGAGGGG  
ACCGAGGCCACCGCGGCGAAGCGGCGGAGCCTCGATCTGCCGCGGTTGGAGCTCGGACGCCGCGACTTCATGA  
AGGCCGGCGCCGCGTCCGGGGCCATGAGCGGTCTCGCCGGTTGTACGAGCATCCTCGCCGACGAGGAGAGCAA  
CGACTCGGGCGACGCGGCCGAGCAGCGGCGAGCACTCGGTGGCTCCGGGCGAGCACGACGAGTACTACGGGTTT  
CTCTCCGGCGGCCACACCGGCCGAGATCCGCGTCTGTCGGCTCCCGTTCGATGCGGGAGCTGATGCGGATCCCGG  
TGTTCCAAGCGGAGAGCGCCCGCGGCTTCGGCCACGACGCGAAGTCGAGCCAGATGCTGGAAGAGGAGGGCGG  
CGGCTACACGTGGGGCGACACCCACCACCCGCGCGTCTCCAGACCGACAACGACTACGACGGCCGCTGGCTG  
TTCGTCAACGATAAAGGCGAACGGGCGGATGGCCCCGGTTCGACTTGGAGTACTTCGAGACCGACGCGATCACGA  
ACGTCCCGAACTGTGAGGGCGTCCACGGGGCATGCATGCAGCTACCTGACACGCAGCTGGTCTTCGGCGTCCGG  
CGAGTTCGCGTCCCGATGCCGAACGACGGCCGCGACGTGCAGAGCCCCGACGAGTACGGCTCCGTCCTCAGC  
GCCATCAACCCCGAGACGATGGACGTCGAGTGGCAAGTCGAGGTCGACGGCAACATGGACAACGGGGACGGCG

GGAAGGAGGGGCGCTGGTTCTTCGCGACCGGCTACAACAGCGAGGAGGGCGTCACGGAGTCCGAGATGGCCCCG  
GTCGGACCGCGACTACGTGAAGGCGTTTCGACATCCCCGCGATCTGGGACGCCGTTCGAGGCCGGAACTACGAG  
GAGATCAGCGGCGTGCCCGTCGTCGACGGGACGATGGACAGCTCGCTCAACGAGGGCGACCGTCCGATCGTCC  
GGTACGTCGCCACACCGAAGAGCCCGCACGGGATCAGCGTGACGCCCCGACGGGAACTACGCCATCGCCTCCGG  
CAAGCTCGATCCGAGCTGTACGGTCATCGACATCGACGCGATCGCCGAGGTCGACGACCCGACGAGGAGTCCATC  
GTCGGGCAGCCCCGGATCGGGATGGGACCGCTCCACACCGCCTACGACGGGCGGGGGCACGCGTACACGACCC  
TGTTTCATCGACTCGCAGGTTGCCAAGTGGGACTACGAGGCCGCCGTTCGAGGCCGAGGCCGGCTCCGAGGAGCC  
GGTATCGAGAAGCACGACGTACACTACAATCCCCGGCCACCTCATCGCCTCGGAGTCGTACACGGCGTCGCCG  
CAGGGCGACTACCTCGTCTCGCTGAACAAGCTCTCGAAAGACCGGTTCCCTCCCCGTCGGACCGATCCATCCGG  
AGAACGATCAGCTGTTCCACATCGGCGACGACGACGCCGGGATGGAGCTGATCAAGGACAAGCCGTTCGTACCC  
CGAGCCGACGACGCCAGTATCGTCCACAAGGACAAGATCGAGCCGGCGAAGACGTGGGACACCGACGACTAC  
GAGATCGACTACGTGCGCGAGGGCGAGGAGTCCCTTCGAACGGGTTCGACGACAGCACCGTTCGAGATCGAGATGT  
GGGCGCGCCGAACGAGTACGCCTTCCCGGAGGTCACGCTGCAGGAGGGCGACGAGGTGACGCTCCGGATCTC  
CAACGTCGAGACCACGAGCGACGTGATCCACTCGATCGCGATCCCGGAGTACGACATCAACCTCGCGTTAGCG  
CCCCAGGACACCCGTGAGGTGACGTTACCCGCGGACCAGCCCGGCGTGTTCGAGGCGTACTGCGCGTACTTCT  
GTAGCGCGCTCCACCTAGAGATGCGCTCGCGGATCCCTCGTGAACCGGACGAATAG

>hxa:Halxa\_1765-Ar Nitrous-oxide reductase (EC:1.7.99.6); K00376 nitrous-  
oxide reductase [EC:1.7.2.4] (N)

ATGACCGACGAACCTACTTCCCCACGCAGGACTCGAGCGAGACCGACGCGGGCACCGAGCGAGAACCCTGT  
TCGATCGCATTCCGCGCCGCGACTTCATGAAGGCAGGTGCAGCCGCCGTTCGATGGGCTCGCTCGCCGGCTG  
TACGGGCTGCTCAGCGACCAGGACGACGGGCTGGCCTCGGCGTCCGACGTTCGATGCGAGCGTTCGCCCGGGC  
GAGCACGACGACTACTACGCGTTCCTTCCGGCGGTCACTCCGGCGAGATCCGCGTCTACGGCGTTCGCCGTGCA  
TGCGGCAACTGATGCGCATTCCTGTTCCGGCCGGGAGAGCGCCCGGCTACGGCTTCGACGACCCGAACGAG  
CGAGATGCTCGAGGACGCGGGCGGCTACTCGTGGGGCGACACCCACCACCCGCGCGTTCGAGCCAGACGGACAAC  
GACTACGACGGCCGTGGGCGTTCGTCAACGACAAGGCGAACGGCCGGATGGCCCGGATCAACCTCAAATACT  
TCGAGACGGACGCCATCGTTCGACATTCGAACAGCAGGGGACCCACGGCGCCTGCTGTCTGCTGCCGGACAC  
GAAGTACGTCTTCGGCGTCGGCGAGTTCGCGTCCCGATGCCAACGACGGGCGGGACCTCACCGATCCCGAC  
AGCTACACGTTCGACTATCGCCGCCATCGACCCCGAGACGATGAACGTTCGAGTGGGAGGTGCTGGTTCGACGGTA  
ACATGGACAACGGCGACGGCGGCAAGGAGGGACGGTGGTTCCTTCGCGACCGGCTACAACAGCGAGAACCAC  
CACGAAAGCGAGATGTCTCTCGGACACCGACTGGCTGAAAGCCTTCGACGTGCCCGCCATCGAGGAGGCC  
GTCGAGAACGGCCAGTACGAGGAGATCGGCGGCGTCCCGTTCGTCGACGGCACCCGCGACAGCGACCTGAACG  
GCGGCGACCGACCGATCGTCCGCTACATCGACGTTGCGAAGAGCCCCACGGGGTCAGCGTTCACGCCGGACAA  
CAAGTACGCGATCGCCAGCGGCAAGCTCGACCCACGTCGTCGGTTCGATCGACATCGAGCAACTCGCCGAGGTC  
GACGACCCCAACGACGCGATCGTTCGGCCGGCCGAGCCTCGGAATGGGGCCGCTGCACACCGCCTACGACGGCC  
GCGGCCACGCCTACACGACGCTGTTTATCGACTCGCAGGTCGTCAAGTGGGACATCGAGGCCGCCGTTCGAGGC  
CGAGGCCAGTCCGAAGATCCGGTTCGTCGAGAAGATCGACGTCCACTACAACCCCGGCCACCTGATCGCCAGC  
GAATCGTACACGGCCGATCCGCAGGGCGACTGGCTGATCTCGCTGAACAAGCTCTCGAAGGACCGGTTCTCTGA  
ACGTTCGGCCCGCAAAAACCCGAAAACGACCAGCTGATCTACATCGGGGACGACGAGGAGGGGATGCAGCTCGT  
GAAGGACACGCCCTCCTACGCCGAACCGCACGACGCGTTCGATCGTTCAGCGCGGACAAGATCCAGCCCGCGGAC  
ATCTACGACCCCGCGGACTACGAGGAGGAGTACGTTCGACACGGCGAGTCTGAAGTTCGTCGAGGACGGGA  
GGGCCACGTGAAGATGTACTCGACGCGCAACGAGTTCGGCCTCCACGAAGTGACCGTCCAGGAGGGCGACGA  
GGTGACGATGACCGTCAACACATCGAGCAGACGCCGGACATCCTCCATTTCGCTGGCGATCCCGGAGCACGAC  
ATCAACATCAAGCTCGCACCGCAGGAAACCCGCGAGGTCACCTTCAGGCGGACGAGCCCGGCGTCTACTGGA  
TGTACTGTGCGTTCCTTCGACGCGCGTGCACCTCGAGATGCGCTCGCGACTGATCGTTCGAACCCCGCGGACGA  
GTAA

>pcl:Pcal\_1928-Ar nitrous-oxide reductase (EC:1.7.99.6); K00376 nitrous-  
oxide reductase [EC:1.7.2.4] (N)

GTGGGGCTGGTGGGGGGCTCGCCTTAAGCCAGCTCTTGGCCAAGGGGGCTGTGGCGCCGGCGCCCCCGGGC  
TGTCGGCACGGGTCCAAGAATTGGCCGCGGCAAGAGGGCTGTGCCTCAAGACGTAGAAAATGCCGTGGCCAC  
GTATCTCCCCGAGGGAAAGTACGACGAGTTCTACATGTTCTCAAGCGCGGCCACTCGGGGACAGGTGGCGGTC  
TACGGCCTTCCCTCTTTGAAGCTTACCGCATAATAGCCGTATTCCTCCCGAGCCTTGGCAGGGCTGGGGCT  
ACCACGATAGGAAGACCATGGAAGTTCCTTCAGCGAGAGAGCCACCGCTGGCAGGCCGCTCAGCTGGGGCGA  
CACCCACCACCCCGAGTTCGATAGGCAAAACGCCGAATATGTTCGGCAGATGGCTGTTCAATTGGCGACAAAGTG  
AACGGGAGAGCAGCCGCATTTCCCTACTAGACTTTGAGACCAAGGACATTGTAAAAATCCCCAATGTACAAA

CTATCCACGGCGGGCCTTCACTACTCCAAACACGGAGTACGTCTTATACGCCACGCAGTATCCAGCGCCTTG  
GGAGCCGGGCAGAGGATATAAGCCAGGTGTACCAAGGTCCCCTGGAGCCAAGTGGTAAAAGATGAAAAGTAC  
TTCTGGGAGTACATGAGGGGTGCCCTCACGTTCCCTCGCCTTTGACCGTAACACTGGGAGATTCGACTTGTCTGA  
AAAGCTTCCAAATAGAGGTCCCGCCCTATGTGCAAGACCTTTCCACAATATCTGGGGCCCCGGCGACGGTTT  
GGCGTTTGTCAACTCCTTTGGCACAGAGGGCATGTTTCGGAGAGACGCCATATGAGGCAAAGTTGTCTAAGAAC  
GACTACGACCTGTTACACATAGTGTGTGGAGAAAGGCTGAGGACCTCTGCTTGGAGCAAGGCCGTTGCAAGG  
AGATAAACGGCATAAAAAGTCTCTCCCTAGAGGACGCGATTAAGGAGGGGGTGTGTCTTTGTTAGAGAGCC  
CAAGAGTCCCCACGGCGTAGATACATCCCCCGGGGGCCTTTATATCTGTGGGAGGCAAACCTGGCCCCCTAC  
GCCACAGTCTACAGCACGGAGAAGATAAAGCAGGCCATTGCAGATAAGAAGTTCGAGGGGCAGGACAGATAACG  
GAGTGCCTATATTGGACTACGGTAGCGTGGTTGCGGGACAGGTGGAGGTCTGCCTAGGCCACTACACACAGA  
ATTCGACGGGAGAGGCAACGCCTACATCAGTTGCTTCGTGAAAATGTAGTAACAAAATTCACCCTAGGCTCG  
CCCAGTACAGAGGGCATAAGCCGTTACAGTGGTAGACAAAAGTGCAGATAACTACAACGTGGGCCACATAT  
GTGTGCCAGAGTCTAATTCGCCTAATCCAGCTGGGAAGTATCTAGTGGCGTTGAACAAGTGGTCAATAGACAG  
ATTCCTCCAGTGGGGCCGCTTAAGCCTCAGAACTTCCAGCTAATAGATATATCTGGTGATAAGATGAGGCTA  
CTCGCAGAGGTGCCCCGTGGGCTGGGGCGAGCCGCACTACGCCAAGGCTATACGGGCTGAGAAGATAAAGCCGC  
TTGACGTATATCCAGTGGGCACGGACCCCCACGTCATGAAAGATGGCCAGTTCCAGTTGAGCTCCAATGCGGT  
GACTGAAATAGGCAAGGAGCGGGTGCAGAGGTATCAGCTACCAGACGGGAGGTGGGTCACTGAGTTTGGGGC  
ACGGTGATTAGGTGACTATAAGGCCTAACATTATTGTGGCAAAGAAGGGCGACATAGTGCGCCTCCACTTAA  
CCAACATAGAGAAGAGCGTAGATGCCACACATGGCCTTGCCTATTGCTGAGTACAATGTGGCGGCCTCGCTGGA  
GCCCCGGCAATATGCCGAGATAGAGTTTGTGGCAGATATACCCGGCGTATTTGCCTTCTACTGCTACGAGTTC  
TGCTCACCGCTCCACTTAGAAATGGTGGGATGGCTGGTAGTAGAGGAGTAA

>hah:Halar\_1529-Ar Nitrous-oxide reductase (EC:1.7.2.4); K00376 nitrous-  
oxide reductase [EC:1.7.2.4] (N)

ATGTCCTCAGAACCAACAGAACTGACGAGCAGCAAGACCCGCTCGCTGAACACGAACAGCAACTGAACGACC  
TGCTGCTGGATGTCGAAGGCCCGGACGCCCTGACGCCGAGAGTCACCTCTCGGGATTGGGGCTTGACGTCAG  
CCGCCGGGGCTTGATGAAGGCTGGCGCCGCCGAGGCGCCATTGGAGCGTTCGCTGGCTGTGCCGGCCTGCAG  
GGCGGTGGGGCAAACACCGAGGCCAAGGGCGGCAGTGGTGACGTGCCAGACCACATGGTCCC GCCGGGTGAAC  
ACGACGAGTACTACGGCTTCTGGTCCGGTGGCCACTCCGGCGAGATTCGGGTGATGGGGCTCCCCCTCGATGCG  
GAACTCACCCGGATTCCGGTGTTC AACCTGAGCCTGCGAAAGGCTACGGCTTCGACAACGAGACCAGCGAG  
ATGCTGGACGACGCCGGCGGCTACACGTGGGGTGACTCCCACCACCCGAACCTTTTCGGAGACCGGCGGTGAGT  
ACGACGGCCGGTACATCTTCGTCAACGACAAGGCCAACGGCCGAGTGGCTCGGGTGAATCTGAAATACTTCGA  
AACCAGCCCATCGTCGACATTCGGAACGTCCAGTCCGTCACGGCTGCTGTATCCAGAGCCCGGACACGGAG  
TACGTGTTTCGCCAACGGTGAGTTCGGACGCCGCTGCCAACGACGGCCGGGACGTCAACAACCCTGAGGAGT  
ACGTCTCCCTGTTTCAGTGCCATTGACCCGGAGACCATGGACGTGCGCTGGCAGGTGAAAAGTGCACGGCAACCT  
CGACATCGTTGACTCCGACAAGGACGGTTCGCTGGGTGCTCTCCTCGGCATACAATGACGAGGAGGGTGTTCGAG  
ATTGAAGAGATGACCAAGGACGACCGGGACTCCGTCAAAGCGTTTCGACGTCCC GGCCATCCAGGAAGTGTTCG  
ACGCCGGCGAAGGCACCGAAGTCGACGGAATCCCAGTCATCGACGGCACCGAGTGCAGCAAACACAACAGCGG  
CGACGACCCGATTGTTTCGGTACATCCCGACGCCGAAGTCGCCCCACTGTGTGCAAGTCACGCCCGATGGAAAG  
TACGGAATGGTTCGCTGGGAACTCTCCCCGACCGTCTCCATCATCGATATCGAGAAGCTGGAGTCGGCATCCG  
ACCTTGCCGACACCATCATCGGCCAGCCTAAAGTCGGGCTGGGACCGCTGCATACGACCTACGACGGCCGCGG  
GAACGCCTACACCTCGCTGTTTATCGACTCGCAGGTGGTCAAGTGGGATATCGAGGCGGGCGGTCAACGCCGAG  
AAGGGCTCCGAAGAGCCGATTCTCGGGAAGATCGACGTCCACTACAACCCCGGCCACATCCAGGCTGTCCAGG  
CCATGTCTTCGGAGCCGACCGGTGACTGGCTGGTCTGACTGAACAAGCTCTCGAAAAGACCGGTTCTCTCCGGT  
CGGGCCGATCTACCCGGACAACGACCAACTGGTCTACATCGGCAACGACAAAAGACAACGACGCCGGCGGGATG  
GAGCTGGTCTCGGACCAACAGTCTACCCCGAACCGCACGACGCGGTGTTTCGCCCAGAAAAGACAAACTCGACC  
CCGCGACCACTGGGAGCCAGAGGACTACGAGGGCGAGAAAAGAGTACATCTCGGAGGATGCCTCGACCGTTCGA  
GCGTATCGACGACAGCACCGTTCGAGGTCAAACCTCCGTCAAACGGAGCGAGTTTCGGCTTCGTGACTTCACG  
GTTTCAGGAGGGCGACGAGGTCCGCCTCACTGCGACCAACATCGAGGGGAGCAAGGACATCGTCCACGGGATGG  
CCATCCCCGAGCACAACGTGAACCTCGCGCTCGCGCCCAAGGACACGCGCGAGGTCACTTCACGGCGGACAA  
GCCCCGGTGTGTACTGGATCTATTGCACGTACTTCTGCAGTGCCTGCACCTTGAGATGCGCTCACGAATGATC  
GTCGAACCAGAGGACTAA



>hbo:Hbor\_35040-Ar respiratory nitrate reductase alpha subunit apoprotein; K00370 nitrate reductase 1, alpha subunit [EC:1.7.99.4] (N)  
ATGAGCCGAAACGACGCATCACACACCGACGAGACGGCCGGAGAATCGGACGATAAACGGCGGGCAGTCGATC  
AGTCGGACGACGAGCAACCGAAGAAGCGAGGCGCAAACGAGGAACGAAGTACGGCGGCCCGCCGTCGGCGA  
CCCGCCGGGAGGTGACAACCCGTCGCCGACGCGGGTTCCTCAAGGGTGTGCGACTCGCGTCCGTCCTCGGAATC  
GGGAGCGCGTCGGCGTCCGACGACGCCCTGTTCTCGATGGACGGACTCCAACCGGTGGGTGACCCCATCGGTG  
AGTATCCGTATCGTGACTGGGAGGACCTCTACCGCGAGCAGTGGGACTGGGACTCAGTATCTCGTTCGACTCA  
CAGCGTCAACTGCACCGGCAGTTGCTCCTGGAACGTCTACGTCAAGAACGGGCAGGTCTGGCGCGAAGAGCAG  
TCCGGCGACTACCCCGGTTTCGACGAGTCACTGCCCCGACCCGAACCCGCGCGGGTGTGAGAAGGGGGCGTGT  
ACACCGACTACGTCAACGCCGAGCAGCGCATCAAACACCCGTTGAAGCGCGTCGGCGAACGTGGCGAGGGCAA  
GTGGAAGCGAATCACGTGGGACGAAGCCCTCACCGAGATTGCCGAACACGTCTGTTGACGAGGTAGAGGCCGGA  
CGGTACGACGCTATCAGCGGCTTCACGCCGATTCCC CGATGAGTCCCGTCTCGTTCGCTAGCGGGTTCGCGGC  
TCATCAACCTGCTCGGCGGCGTCAGTCATTCTGTTCTACGACTGGTACTCCGACCTGCCGCCGGGCCAACCTAT  
CACGTGGGGCACGACGAGACGACAACGCCGAGAGCGCAGACTGGTACAACGCCGACTACATCATCGCGTGGGGG  
TCGAACATCAACGTACGCGCATCCCGGACGCGAAGTACTTCTCGAATCGGGCTACAACGGCACCAAGCGCG  
TCGGTATCTTCACCGACTACTCGCAGACGGCCATCCACACTGACGAGTGGCTTAGCCCTGACCCCGGCTCCGA  
CACTGCACTCGCACTCGGGATGGCACAGACAATCGTCTCCGAGGGACTGTACGACGAGGCGCATCTCAAAGAG  
CAGACCGACATGCCGCTTCTCGTCCGGCAGGACACCCGTAAGTTCCTCCGTGCGAGCGACGTCCCGTCCGTCA  
ACAGCAGCGCCGACCGGCCGAATGGATGCTTCTGATGCTCGATTGCAACGGGCAACTCCGTGAAGCGCCGGG  
ATCGCTCGGTGAACGCGACGAGCAGAAGGACTACTCGAAGAGCATCGACCTCGACTTTGACCCCGACTCGAC  
GCCGAGACGACCGTCCAGACCGACGACGGAAGCGTCCAAGTACGGTCTGTGTGGGCCGAACGCGCGACGAAC  
TCGCCAGTACGACCCCGAGACGGTCACCAAGATGACCGGCGTCCGGTACGGAGACGTACCAACGAGTCGCCCC  
CGAGTTCGCCGATGTGCAACGCGCGAAAATCATTACGGCAAGGGCGTCAACGACTGGTACCACAACGACCTC  
GGGAACCGCGCCATCCAGTTGCTCGTACGCTGACCGGCAACCTCGGCCGTCAAGGAACCGGGGTTGACCACT  
ACGTCCGCCAAGAGAAAATTTGGACGTTCCACGGGTGGAAAACCTCTCGTTCCCCACCGGAAGGTTCCGCG  
GGTGCCGACGACGCTGTGGACCTACTACCACGCCGGTATCCTCGACAACACGGACGCGGACACCGCGGCGAAG  
ATACGCGAATCCATCGACAAGGGGTGGATGCCCGTCTATCCTGAGGAACGCGAAGACGGATCGCGGCCGGACC  
CGACGACGATGTTCTGTTGGCGGGGAACTACTTCAACCAGGCAAAGGGGAACGTGCGCGTGAAGAGGAGTT  
GTGGCCGAAACTCGACCTCGTGGTGGACATCAACTTCCGGATGGATTCGACGGCCCTCTATTCGGATATCGTC  
CTGCCGACGGCCAGTCACTACGAGAAGCACGACCTGTGATGACGGACATGCACACCTACGTGCATCCGTTCA  
CGCCCGCTGTTGAACCGCTGGGCGAGTCAAGACCGACTGGCAGATATTCAAGGACCTCGCCGAGAAGATTCA  
GGAAGTGCACACCGAGCGCGGCGTCAACCGATTTCCGGATCGGACGTTTCGACCGCGAGATCGACCTCCAGTCA  
GTGTACGACGACTACGTCCGCGACTGGGAGACGGAGACGGACGGCGCACTCGCGGAGGACCGCGCGGCCGCCG  
AGTACATCCTCGAACACTCAGCGGAGTCAATCCAGCGGGAACCGACGAACAGATAACGTTCCGCCGATACGGT  
CGAACAACCGCAGCGACTGCTCGAAGCGGGCGACCACTGGACTTCTGATATCGAAGACGGCGAGGCGTACGCG  
CCATGGAAGGACTTTCGTGCAGGACAAGAACCCGTGGCCAACCGTACGCGGCCGACGAGTACTACATCGACC  
ACGACTGGTTTCTCGAACTCGGCGAGCAGTTGCCGACGCACAAGGAGGGACCGACGAACACCGGCGGCGACTA  
TCCGATGGAGTACAACACGCCGACGGTTCGATGGGCTATCCACTCGACGTGGCGCGACAGCGAGAAGATGCTC  
CGCTGCAACGCGGCGAACCCATCGTCTACATCAACCCGACGATGCCGCCGAACGCGGCATCGAGGACGGCG  
ACACCGTCGAGGTGTTCAACGACCTCGGTGCCGTGGAAGTACAGGCGAAGATATATCCCAGCAGCGAACGGGG  
GACGCTTCGACACTTCTTCTCGTGGGAGAAGTTCCAGTACGCCAGTCCGGAACAACCTTCAACACGCTCGTCCCG  
ATGTACATGAAACCGACACAGCTCGTCCAATACCCCGAAGACACGGGCGAACACCTGTACTTCTCCCAACT  
ACTGGGGGCAACGGGGTCAACAGCGACGTCCGGGTGGACGTACGAAAGAAAGGAGGTGATGGCGGATGA

>vdi:Vdis\_1441-Ar nitrate reductase subunit alpha; K00370 nitrate reductase 1, alpha subunit [EC:1.7.99.4] (N)  
ATGCCTAAGGCCAACTTCATTAAGGAGGTCTTCAGGCACTTCTGCCAGAGAGAGGTTTAAACAATGGATGGA  
GTGAGTTGGATAATGCGGATAGGGCTTGGGAGGACCTGTACAGGAATCGCTGGCAGTATGATAAGGTGGTTAG  
GTCGACACACGGCGTTAACTGCACAGGTTTCATGTAGCTGGAGGGTCTATGTTAAGGATGGTATAGTGGTTTGG  
GAGCATCAGGCGGTTGATTACCCAACCAATGGACAAAACATGCCTGAGTACGAGCCGAGGGGCTGCCCGAGGG  
GTGCGTCATTCTCGTGGTACATATAACGCCATTACGTATCAAGCATCCATACGTTAGGGGTGAGCTCATGAG  
GCTATGGAGGGAGGCGATATCGAAGACAGGGGATCCCGTGAGGGCTTGGGAGTACATAGTCACAAACCCAGGG  
TTAGCCAGTAGGTATAAGTCAGCTAGGGGTAAGGGCGGCTTTGTTAGGGCTTCTGGGATGAGGTCCTCGAAT  
TAATATCGGCGGCGCTGATATACACAATAAGGACCTACGGGCCAGATAGAATATTTGGCTTCACGCCAATACC  
CGCAATGTCCATGGTAAGCTTCTCATCTGGGTGAGATTCCTTGAGTTAATAGGTGGTGTGATGCTAAGCTTT

TATGATTGGTATGCGGACCTACCAATCGCGTCACCACAGGTATGGGGTGAGCAGACTGACGTGCATGAGAGTG  
CTGATTGGTTCAACTCAATGTACATAATTGTCTGGGGCACGAACATAGCCATGACGAGGACCCCAGACGCCCA  
CTTCCTAGCTGAGGCCAGGTATAGAGGTACGAAGGTGGTCGTTGTGACCACGGATTATACCGACGTTACAAAA  
TTCGCAGACTTATGGATAGCGCCTAAGCCCCGCACTGATGCTGCCTTGGCTATGTCGATGATTCACGTCATAT  
TGAGGGAGTTCTACGTGGATAGGCAGGTGGATTACTTCATAAACTACGTTAAGAGGTATACAGACTTACCCTT  
CTTAGTAGTATTAGAGAGGAGTGGAGATTCCCTACATAACGGGTAGGTTTCTGAGGGCTTCAGACTTAGGGCTG  
AATGTACCAAATGCGGAGTGAAGACCGTAGTCCTTGACTTAAATACTAAGCAGTTAGCTATCCCCAATGGTA  
GTATTGGATTTAGGTGGAGTAATGAGGGTAGGTGGAACCTTAAGCTCGAGGACTCAATAACGGGTAAACCCAT  
AGATCCTGCGTTAACATTATTGGGCATGCATGATGATATAGTATTGGTTCAGACCTACGTTTTTGTATGATAAG  
GGCCAATACCAATCATCAGGGGAGTCCCCTTAAGAGATTGAGTATTGGTAATAAGGACTTACTGGTCACGA  
CTGTCTACGACCTACTGCTTGCCCATGTAGGTGTCAACAGGGGCTTACCTGGTGATTATCCATCAAGTTATGA  
TGATCCTAAGCCATTTACGCCGGCTTGGCAGGAGATGATAACGGGTGTTGATAGGAAGGTTGCAATTAGGGTT  
GCGAGGGAGTTCGCTAGGAATGCTGAGTTGACTGGGGTAGGTCTATGGTCATCGTAGGCTCAGGCATTAACC  
ATTGGTACCACTCAGACCTCATTATAGAGCGATAATAACAATGCTTATGCTGCTCGGAACCATAGGTGTTAA  
TGGAGGTGGCTGGGGCCTACTACGTGGGTCAAGAGAAGGTTAGGCCCTTGATTCCCTGGTCCCACATAGCCTTC  
GCCAGGATTGGGTTAGACCACCAAGGCTCCAGAACACCACGTCATGGTCCCTACATACACAGTGACCAATATA  
GGTATGAGGACCTAAGCATGGGTAAGGTTGCCGTTAACCCGAGTATGAGCATCCAGTGGACTATAACGTTAT  
TGCGGTCAAGAATGGGTGGTTACCATTCTATCCACAGTTCAACATCAATCCAATAAGACTCTATGATGAAGCC  
ACCAAGGCTGGGGCAAGGAGTATGAGGAGGTTATTAAGTACGTAAAGGAAGGACTTACGAGGGGTAACATAA  
GGTTCGCTGTCGAGGATCCCAGCGCACCCGAAAACCTCCCAAGGATATTATTCATGTGGAGGGCTAACTTCCT  
CGCCTCGAGTGGTAAGGTCATGAGTACGTACTCAAGCACCTACTAGGCACAGATAAATCGGTGATGGCTAAG  
GAGGGATTGATAAAGCCTAAGCTCGTCAATTGGCGTGAACCCGCACCCATAGGAAAGCTTGACTTAGTGGTCA  
CGATTGACTTCAGGATGAGCACATCAGCGCTATACTCAGACATAGTGCTACCTGCGGCGACCTGGTATGAGAA  
GAATGACCTAAGCACCACGGACCTACATCCGTTTATACATCCATTTAACCAGGCCATACCACCACCTGGGAG  
GCTAAGGCTGATTGGGACATATTTCGTGGCGTTAGCCAAGAAATTCAGTGAGATGGCGTGCAAATACCTAGGCA  
AGGTCAAGGATGTGATTGCTGTACCGTTACTGCATGATACGCCTGGTGAACCTGGGCAATAGGTCTGGCCCCGAA  
CATTGTTATTGTTGAGCGTGATTACTGCGATGTGTACCATAAGATGATCACACTTGGTCCCCTAATTAAGGAT  
TCAATAGGTGCTAAGGTTATTACGTGGAGTGCCAGGGAGGAGTATGAGGGAGTCCGTAGACTTAATGGGATTG  
ACGAGCACGGTCACCCACTATTGGTTAGGGATTATCAGGTTGCTGAGGCAATACTGCATTTATCTAGTACGAC  
TAATGGCGAGGCATCGTATAAAGGCATACAAGGCGCTTAGTGGTAGGGTTGGTATTGACTTAACGCATATTGTG  
GAAAATCAAAGAGAGGTTGGTGATACATTTTCAAGTATCTATCCTACCAACCAAGGAGGGTGTAAAGGACACCTA  
TTTGGAGCGGTAAGGAATCTGAGGAGAGGCCATATACGCCATTTGCATTAATGTGGAGGACTTAGTGCCTTG  
GAGGACGTTGACGGGTAGGCAGCACGTGTACCTGGATCATGAGTGGATCATAGAGTTTGGGGAGCAGCTACCG  
ACGTATAAACCTCCCCTTGTCCAGGTACCGTTTAAATAGCGGTGAGGGACCTAGCATTAGTGGTAAGTACTTGG  
TTGCACGTTACTTGCAGCCGCATGGTAAGTGGCAGATACACTCAACATACATGGATAATCAAATAATGCTAAC  
GCTATTTAGAGGGGGTCCCCTTATTGGATTAATAGCGATGATGCGAAGGAGGTGGGTATTAAGGATAATGAT  
TGGGTCGAGGTGATTAATAGGAATGGTGTAAATCGTGGCTAGGGCTGTCACGTGATAAGAGTTCCGAGGGGTA  
CCGTGATCATGTATCATGCCAAGAGAGGACTGTGAATGTCGGTAGGTCCAAACTGACTAATAGGCCGGGTGG  
TACCATAACAGTGCCACTAGGGTTAGGGTTAAGCCGACGCACATGATCGGTGGTTATGCCCAATTAAGTTGG  
GCGGTTAATTACTACGGCCAGTCCGTACCCAGAGAGATGAGGTTGTGATAATTAGGAGGTTGGGGTGA  
>pai:PAE3611-Ar nitrate reductase alpha subunit (NarG); K00370 nitrate  
reductase 1, alpha subunit [EC:1.7.99.4] (N)  
ATGCTTAAAACAACACTAGGCGGCGGATGTTAGCCGGCGTTGCTACTATAAGCGCGGCAGCTTGGGTAATGGCGT  
TGGCCCAGAATTTGCAATATTTACAGCCGCTGGCGCAGTTTGTAAACACGAGGCTTCAATACCCTGACAGGTC  
GTGGGAGGAGCTCTACCGCCGCGCTGGCAGTACGACAAAAGTGGCCAGGTCTACACACGGCGTTAATTGCACC  
GGCTCTTGCTCGTGGAATGTGTACGTCAAGGACGGCCTTATAGTGTGGGAGCTACAGGCCACGGACTACCCGG  
ACATCTCGCCGGACATACCCAATTACGAGCCCAGGGGATGCCCGAGGGGGGCCAGTTTTTCGTGGTACGTATA  
CTCGCCCTTGGGGTGAATAATCCCTACGTACAGGGGTACTCATAGACATGTACCGGAGGTTTAAACAAGAG  
ACCGGCGATCCAGTGGAGGCGTGGCGCCGATTTGTGGAGGATCCCGCCAATCGCGCGGCTTATCAAAGGCAA  
GGGGGAAGGCCGGGTGGGCCAGGGTCACTTGGGACGAGGCCCTTGAGCTGATATCCGCGGCGTTGATATATAC  
AATTA AAAAGTACGGCCCCGACAGAATCTACGGCTTCAACCCCATTCGCCCATGTCCCCGTGAGTTACGCC  
TCAGGGGCGAGGTTTATTGAGCTAATCGGCGGGGCAATGGGATCGTTTTTACGACTGGTACGCCGACCTTCCCC  
CGGCCAGCCCTCAGATGTGGGGCGAGCAGACAGACGTCCCTGAAAGCGCCGACTGGTACCACGCCAGTATAT  
GATCGTGTGGGGGACTAATTTGCCAATGACTAGGACGCCCGACGCGCCTATGTACACACAGGCTAGATATAGG

GGGGCGAAGGTAGTTGTAGTCAGCCCGGATTACAGCGAGCACGTCAAATTTGCCGACTTATGGCTCCCGGCAT  
TGCCCGGCACAGACGCCGCACTGGGCTTGGCCATGGCGCACGTGGCTTTAAAAGAGTTTTACGTGGACAAGCA  
GTTCAAATGCCTGAGGGAATACGCGAGGAGGTATAACCGACCTCCCCTTCTTTGTTATACTAGAGCCCGCTGGA  
GACGGCACATACTACAGGGGAGGTTCCCTTCGGGCTTCAGACGTACCGGAGCTTAAGGATAAGGTGGGCGGAA  
ACCCGGAGTGGAAAACAGTTGTATTGCAGAGCGACGGCACTTTGGCGGCTCCCTACGGCTCTATAGGCTTTAG  
ATGGGATGGGAGCGGGAAGTGAATTTAGAGCTGAAAGGAATTACGGCGAGGGGCGAGGGCGATATAGACCCT  
GTGCTTTCTGTAATGGAGGTGGGGAAGTATGAAAAAGTGCCGGTGAAGTTCTTCGCCATGGACTTCGACGTGA  
AGAGTACGGTGAGGGAAGTCCCCGCGATTAAAATTGGCGATAAATACGTCACTACTGTATTCGACTTATTGGC  
GGCGCATTTAGGAGTAAAGAGAGGGGACTTGGGAGGGGATACCCAGCTGATTACAACGACCCCAAGCCCTTC  
ACTCCCGCGTGGCAGGAGTCTATAACAAATATCTCGCGGACCTAGCCATAAGAGTTGCCAGGGAGTTTATGA  
GCACTGCCATTTACTCTAAGCCTGTTTACGGCAAGCCGGGCGATCCCCGTTCTTTGGAGACGACGCCACGCC  
TTGTGGGGGCGAGAGCTATGATATTCGTAGGTCTGGGATTAACCACTGGTATCACGCAGATTTAATATACCGC  
TCAGTCTTATTATTAGTACTGCTGGGCGCCACCCAGGGCAAGAACGGCGGGGCTGGGCCATTACGTGGGGC  
AGGAGAAAATAAGGACTCTCATCGGGTGGTCCACAATAGCCTTTGCGCTTGACTGGATAAGGCCGCCGAGGCT  
ACAAAACCTCCCCAGCTACTGGTACGTCCACACCGACCAATGGCGTTACGACCCGGTCAACCTAAATTATAC  
GCCGCCACCTGGGCGAAGAAGTGGGGCGATATTCACGAAAATGGACGCCAATGTAATTGCCGTGAGGCTTGGCT  
GGTTGCCCTTCTACCCGTCGTTAATGTAACCCCGCTTGAGCTAGGCGACAAGCTAGTGAGCGAGGCTAAGGC  
TCAAGGCGTCCCCGACGCGCAATTAGGCCAGTACGTGGCGAGGAGAGTGGCGCAGATGTTGAAAAACGGCGAG  
ATTAAGCTGGCAATAGAAGACCCCGACGCTCCTGAGAATTGGCCAAGGGTGTGTTTCGTCTGGAGGGCAAATC  
TGCTGGGCTCCTCCTCTAAGGGCCATGAATACTTCTTAAACACTTGCTGGGCACTGACAACAACGTAATGAA  
TAGGGAATACGCTGTGGAGGAGGGATTAGTTAAAGAGGTGAATATTAGAAAGCCGGCGCCTGAGGGCAAGCTG  
GACTTATTAGTTGTGTTAGACTTCAGAATGGCAACGTCAGCGGTCTATGCGGACGTAGTACTCCCCGCGGCGA  
CGTGGTATGAGAAATACGACTTATCCATGACAGATCTGCACACGTTTTATACATCCCTTTACGCCCGCTGTGGA  
TCCGCCGTGGGAGGCAAAGGCCGATTGGGATATATTCAAGGAGCTCGCAAAGAAGTTCTCTGAGCTGGCTAGG  
AAATATCTGCCGCAAGAGGCCGTATGACGTAGTGCTAACGGCTCTTCTCCACGACACGGCTCAAGAAATCGCCC  
AGCCGTTTGGCGAAGTGAAGGACTGGAAAAAGGGCGAGGTGGATCCCGTCCCCGGCAAGACTATGGCCGCTGT  
GTCTCTAGTGAGGAGGAGGTATTGGGACGTATACGACATGTACATCACGCTGGGGCCGCTCGTAGTGACGATG  
GGTCTATCGACAAAGGGCATAACCCGCTTTAAACCCGTGGAGAGCTATAACTGGCTGAGGGAGATAAACGGCT  
TGACAAGCGCTACGTCGCAATTCGTACAAGCGCAGTGCGCCAACGTAGGGGGATGCCCGAGCATTGAGAGGGA  
TAAACAGGCGGCTGAGGCCATGCTGGCCATATCTCCTGAGTCAAACGGCGAGGTGGCCTATATGGCTTGGAGT  
AATTTGAAAAAGTAGTGGGTCTTCCGTTAAAAGACCTCCCCGCTAAAGAGCACAGAATTTATGTTTAAACGATA  
TCGTGCCCCAGCCGAGACGCGTGACTACCTCGCCTGTGTGGAACGGAATAGAGGCTCCCGGGAGGACTTACTC  
GCCATTTACTGTAAACACAGAGAGGAAAGTGCCCTGGCGCACTCTGACAGGCCGCCAGCACTTCTACATCGAC  
CACGAGTGGTTTTAGAGAGCTGGGCGAGTCGCTTCCAGTATACAAGCGCCCGCTCGACCAAGTAATGGCCAAGT  
TAATTGCTGACGTTAATCTATCCGACTACTGGTACGATCCCGCCAAATATAGAGTGGAAACTCCCGGCGGCAA  
ATACCTAGTCCCTCCGCTATTTAACTCCACACGGCAAGTGGAAATATACTACTTACGTATTGGGACAACCTAATT  
ATGTTGACGTTATTCCGCGGCGGGCAGGTGGTGTGGATTAAACGACGAAGATGCTAAGTGGCTCGGCGTTAAAG  
ATAACGACTGGATTGAGGTGTATAACGCCAACGGCGTTATAGTGGCCAGAGTGGCCGTGAGTCCGAGAATTCC  
GCGGGGCACAGCCATTATGTACCACGCCAAGAGAGGCATGTGTACGTCCCCATAAGCCCCAAGACTGGCAAG  
AGGGCTGGAATTCACAACAGCGTCACTATAACTCACCTCAAGCCGACAAAATGGTGGGCGGCTATGCGCAGT  
TGAGCTGGTCTTTAATTACTACGGCCCCACTGGCGTAAAATAGAGACTCTAGTAGTAGTAAGACCCGCCGG  
CAGGGTGAGGCTATGA

>fpl:Ferp\_0311-Ar nitrate reductase, subunit alpha (EC:1.7.99.4); K00370  
nitrate reductase 1, alpha subunit [EC:1.7.99.4] (N)

ATGGCTGAAAGGATAAAAAGATGTGTATTCTCCAGAGTTGAGAAGCTGGGAAGAGTTTTACCGAAACAGATGGC  
AGTACGATAAAGTTGTTAGGAGCACTCACGGAGCTAATGACGCGGAAGCTGCAGCTGGTTTGTTTACGTA  
AGACGGAATAGTTACTTGGGAACCTCAAGCGACCGACTATCCGAGTTTCAACCCAGATGTACCTAACTACGAA  
CCAAGAGGGTGTGAGAGGGGAATTAGTGCATCTTGGTATCTCTACAGTCCGTTACGCCCCAAGTATCCTTATG  
TAAGGGGAGTTCTCCTCGATCTCTGGAGAGAAGCAAAGGAGAAGCACAAAGACCCGGTGGAAAGCTTGGAAAG  
CATCGTCGAAAATCCGGAGTTGAGGAACAAGTACGTGAGAAAGAGAGGAATGGGTGGATTGAGAAGATCGAGC  
TGGGATGAGGTAGTTGAGATAATAGCCGCTGCAACGATTTACACAGTTAAAAGTACGGCCAGACAGAGTTA  
TAGGATTCACGCCGATTCCAGCGATGTGATGATAAGCTACGCCTCTGGAGCAAGATTCCTCCAGCTTTTAGG  
AGGAGTTTGTCTGAGCTTTTACGACTGGTATTGCGATTTACCTCCAGCCTCTCCCCAAAATATGGGGTGGCAA  
ACGGATGTAAACGAGTGGCAGATTGGTATAATGCCGGATTCATCGCAATCATGGGTTCGAACTTAAACATGA

CCAGAACTCCAGACACCCATTACTTATCGGAAGCCAAGTATAGAGGAGCTAAAGTCGTCGTTTTCTCTCCAGA  
CTATAGCCAAGTTAGCAAGTTTGTCTGATGTATGGATACCAATAGAGCAAGGACACGACGCAGCCTTCTGGATG  
GCAGCCAACCACGTCATAATGAAGGAGTTCTACTTCGATAAGGAACTCCCTACTTCATCGAATACGTGAAAA  
AGTACACCGATCTACCTTTCTTAGTCAAGTTAAAGCAAGAAGGGGATGTTTTCGTCTTTGACAGATTTTTGAG  
GGCATCCGAAATTGAAAGAGGAAAAGATCTGAAAAATGCGGAGTGGATTCTGTGCGTTATGGACGAGAAGGGA  
GAGATTAGGATTCCGAACGGAAGCATTGGATTTCAGGTGGGGAGAAGAAGGAAAGTGGAACTTTGAGATGAGAG  
ATGCCGTTGACGGAGAAGAAATTGACGTCAAACCTCAGCCTCTTCGGAGAAGATTACGTGATGGTGAAGTTTTA  
TTACGAAGACTACGGAGAGAGCATAACGAGCCGTTCCAGCGAAGAAAATTAAGACAGCCAATGGAGAAGTCGTA  
GTCGCTACCGTCTTTGACCTCCTCGCAGCACACCTCGGAATTTCCAGAGGATTGCCAGGGGATTATCCTAAAG  
ACTATGACGACGACAAAACCTTTCACTCCAGCTTGGCAGGAGAAGTACACGAAGATAAGCAGAAAGACGGTCAT  
AAAGATCGCAAGAGAGTGGGCTGAGAACGGAGAGAAAATAAGGGAAGAAACCTCGTGATAATCGGTCCCAGGA  
TTGAACCACTGGTACCACAACGATTTAAATTACAGAGCCGTTATCACGGCGTTGATATTAAGTGGAAAGCGTCCG  
GAAGAAACGGAGGAGGGCTTGCTCATTACGTTGGACAAGAAAAGGTAGCTCCTATTGCCTCTTGGGCTGTTGT  
TGCCTTCGCACAGGACTGGGTTAAGCCACCAAGACTGCAAACTCACCAAGCTTCTACTACGTGCACACGGAT  
CAGTGGCGATACGATGGATGTAAGTATATAGACAAGGTCGATGGACTGCCGAAGCACACAATAGACTTCAACG  
TGAAAGCTGTTAGGCTTGCTGGTTACCCTTCTATCCTCAATTC AACGAAAATCCTTTGAAGCTCGTGGAAAGA  
GGCTCAAAAATCGGGAGCTAAGAGTGACGAAGAGATCAGGAGATGGATAGTCAATAAACTGAGGGAAGGAAGT  
TTGAAGTTCGCAATAGAGGATCCGGACGCTGAAGAGAAGTGGCCGAGAGTATGGTTTCATATGGAGAGGGAATG  
CCATAGGATCGAGCCCCAAGGTCACGAGTTCTTCTAAAGCACTTCGTTGGAGCTCCAAACAGCAACGCAAT  
GGCTAAAGAGGTCGCCAAGGATCTGGTTGAGGAGGTTGTTTGGAGAGAAGCTCCGGAAGGTAAGCTGGACTTA  
ATCGTTGATTTGAACTTCCGAATGGACACAACCTGCCGTTTACTCGGACATCGTTTTGCCAGCTGCCACTGGT  
ACGAAAAGAACGACATTC AATCCACAGATTTGCACACATTCATTAAGTGTCTTGGAGCTGCAACATCTCCAGC  
TTGGGAGGCAAAAATCCGACTGGGAGATTTTTCAAGCTCATCGCAAAGAAATTCAGTGAGCTTGCTGAGAAGCAC  
TTCCCGAAGCCGGTTAAAGATGTTGTAATGGCACCTCTCCTCCACGACACTCCGGAAGAGATAACCCAGCCGG  
AGGTCAAGGACTGGAAGAAAGGAGAGACGGAGCCAATTCCTGGAAAGACCATGCCCAAACCTCGTAATAGTCGA  
AAGGGACTACGCCAACCTGTACAAGCGATTTCATATCCTTAGGACCGGGAATTA AAACTCTCGGAGCTCACGGA  
GTTAGCTGGGATGCAAGCGACATTTACGAGGAGCTTCTTGAGAAGTATCCCACGGCGAAGTGGAAACGGAACA  
AGTACATTTCCCTTGAAAGCAGAGGTGACTGTTGCCAACGTAATTCGACTTTTTGCTCCC GAAACGAACGGAGA  
GATTAGCTATCGAGGATTC AAGAATTTGGAGAAGAAGGTCGGTAAAAAGCTTAGTGAAAATGTGCAACCCTAC  
AGAAGCTACAGAGTTACTTTGCAAGATGTGCTGACGCAGCCGAGAAGAATTATCACAAGCCCCGTCTGGAGTG  
GAAACATCAACGATGGAAGAACATATTTCCCTTACACCTCAACGTCGAATTCGAAAATACCTTGGAGGACTCT  
AAGCGGAAGGCAGGAGCTCTACCTTGACCATCCCTACTACATAGCCTTCCACGAAGCTTTGCCAACATTCAAG  
CCCAAGCTCAGCCCCAAGCTTCTTGACGAGCTTGAAAGGAGAAGAAGGACTGATTCTAAACTTTATAACACCTC  
ACGGGAAGTGGAGCATTCACTCAACCTACTACGACAATCTGAGAATGCTAACTTTGTGCGAGAGGAGGGCAGGT  
AGTCTGGATAAACGACGAAGATGCGAGGAATGCTGGAATAAACGATAACGACTGGGTAGAAGTTTATAACAAC  
AACGGAGTCATAGTTTG CAGAGCTGTCGTTTTCTTCAAGAGTGCCGAAAGGAATGGCAATAATGTACCACGCTC  
CAGAGAGA ACTCTCTACATTCGAAATCGAAGAAA ACTGGAAGGAGAGGAGGATT CATAACAGCGTGACGAG  
AACGAGGCTCAAACCGCTTCTCATGGTTGGAGGGTATGCGCAGTTCAGCTACTACTTCAACTACTGGGGACCG  
ACGGGAGTGAACAGAGACACTTACGTTATTGTTAGGAACGTTATTGTTAGGAAGCTTGAGAGGTGA

>sia:M1425\_0828-Ar nitrate reductase, subunit alpha; K00370 nitrate reductase 1, alpha subunit [EC:1.7.99.4] (N)

ATGACATGGCAAAAATTTGAAAATAAAGGACGTGAATGGGAAGAGTTTTACAGGCAAAGATGGGCTTATGCAA  
AGGCAATTAGATCTACACATGGCGTTAACTGTACGGGGTCTTG CAGTTGGCTGATATATGTA AAAGATGGTAT  
TATAATTACAGAAATGCAAGCACTAGATTATCCTATTATAAATGAGGAAATACCACCTTATGAACCTAGAGGA  
TGTCCTAGAGGAGCCAGCTTTTCTGTTATGAATATGCACCTCATAGAATAAAAACATCCTTACATTCGTAAGC  
AACTACTTAAGTTATGGAGAGAAGAATTAGAGAAGACAAAAGATCCTATCAAAGCTTGGGAAAATATAGTCGA  
AGATCCGGAAAAGGTCAAGCTCTATAAGGAGAATAGAGGTAAAGGCGGATTCGTTAGAATTAGTTGGGATGAA  
GTCGAGGAGTTAGTTCTGCTGCGTTAATATATACGATTA AAAAATACGGACCAGATAGGATTGCTGGTTTTA  
CACCAATACCTGCCATGTCAATGGTTAGTTATGCTGCAGGAACTAGGTTTTTATCATTAATAGGAGGAGTAAT  
AATGAGTTTCTATGACTGGTATGCGGATTTACCTATAGCTTCTCCTCAAGTATGGGGCGAACAACTGATGTT  
CCAGAAAGTGCTGATTGGTTTAACTCTACCTATATAATAGATTGGGGAACCAACATTCCTCAAACAAGAACAC  
CAGATGCTCATTCTCTCCGAAGTCAGATATAGAGGAACTAAGGTAGTTGCGATTTCTCCGGATTATGCGGA  
ATATGTA AAAATTTGCAGACTTATGGTTACATCCTAAACCTGGTACTGACGGAGCACTAGCTTTAGCTATGGCG  
CATGTAATAGCTAAAGAGTCCATGTTGATAGGCAAGCGAAGTACTTTACAGAATATTTAAAGAAGTATACCG

ATGCTCCATTTTTAGTAATCTTGGAAACAACAAAATGGAAGAGTTATATCTGGAAGATTTCTTAGAGCATCTGA  
TATTATTGAAAACGTAATAAATGGAGAATGGAAGTTAGTAGTATATGATACATTAAGGGGAGATTCGTAATT  
CCAAATGGATCTATAGGGTTCAGATGGTCAGACGAAAAGAAATGGAATCTAAAACACAAGATAGCTTAACGG  
GAGAAAATATAGAACCAGCTTTAACATTTCTAGGGATAGAAGATCAAAGGATGATGATATCTCTCACTAGACT  
TGATGAGAAAGGGTTTATAGAAAGGGAAATCCCTGTCAAACACTAGTAAAATTAGCTAATGGTAAACAAATTTAC  
GTTACAACAGTATTTGATTTATTATTAGCCAATTTAGGTGTTAGAAGAGGAGATCTGAAAGGGTATCCAACATA  
GTTATGACGATGATAAGCCTTATACTCCTGCTTGGCAAGAGAAAATAACGGGAGTCCAAGGGATCTAGTAAT  
ACAAGTAGCTAGAGAATTCGCCAAGAATGCGGAGGATACTAACGGTAAATCCATGATATTAGTTGGAGCTGGC  
GTTAATCACTGGTTTAAACAGTGACCTAATCTATAGGGCTATAATAACTATTTTAAATGTTAATAGGTGCGATTG  
GAGTTAATGGCGGGGGATGGGCACATTATGTTGGTCAAGAAAAGTTAGACCTTTTGAGGGGTGGCAAACAAT  
TGCTTTTGCAAGAGATTGGATGCTTGCTACAAGATTTCAAACACTACTACTTGGATATACATTCATTCTGAT  
CAATGGAAATATGATAGCTTAAACATTAGATAAATTAACCTTAATAACACATTGTATAAACATCCAGCAGATT  
ACATAGTGTTAGCAGTAAAAAGAGGTTGGACGCCCTTCTATCCACAATTTGATAAAAAATCCTCTAAATCTCTC  
TCCAGAAAATGTTATCGATAAGATTTTCATCCGGTGAAGTGAAGTTTGAATAACTGACCCAGATAATCCAATT  
AATTTCCCGAGAATATTTTTCATTTGGAGAGCAAATTTACTGTTTTCTAGTGGAAAAGGAAGCGAATACATTC  
TAAAGCACTTATTAGGTACTCATAACAGTGTGAATAATACTGAAGATGCTAAAGATAAGGTGACTGAAATTAC  
TTGGAGAGAACCTACACCAATAGGAAAGCTTGACCTAATAGTCGATCTTAACTTTAGAATGGATAGTAGTGCG  
TTATATTCAGATATCGTGCTTCCAGCTGCAACATGGTATGAAAAATATGATATAAGTTCTACTGATATGCATA  
CTTTTGTTTCATCCATTTCAACCAGCTACAGATCCTTCTTGGGAAGCTAGGAATGATTGGGATATTTTCGTAAA  
TTTAGCTAAGAAATTTCTCAGAAATGGCATCGAGATATCTTAATGGAAAGCATAAGGATGTCGTCTATTTACCT  
TTATCCCACGATACCCCAGATGAAATCTCACAATCTTTAATTGAGGAGGAATTAGATCCTCCTTATATTTTCAG  
CTCATCTTGCAAGTAAGATAATCCCAAAGAGGAACCTTCGGGAATCTTATAGTCATTGAAAGAGATTATACTAA  
AGTTTACGAGATGATGATTTTCATTGGGGCCTCTGATAAGAGATAAGGAATTACTTTATGTCGGCATAACCCGTT  
AATTATCGTAAGGAATACGAAGAATTGAAAGAAGAATTAGGAGAGATAGATGATAGACCAGATATTAAGGAAG  
CTAAGAAAGTGGCTGAAGTAATGCTTAGATTAAGCGGGCTACTAACGGTGAGGTTTCAGTTAAAGAATATAA  
ACAACCTTGAAGTGAACACGAGTCTTAACTTTAGCGATCTATATGAAGGAATATCCGAAATAAGATTAAGTTT  
GACGATATAATAGCTTCACCTAAAAGAGTTATAGACTCACCTATCGAGTCCGGAATAGTGAAGGAGAAAGGA  
CTTATAATTCGTTACGTTTAAATATAGAGTATGAAGTACCTTGGAGGACATTATCTGGAAGGCAACATTTTTTA  
CTTAGATCATCCGATTATAAGGGAATTAGGAGAACAGCTACCAATCTATGCACCACCTTTAGAGTATAATAAA  
GTAATTAAGATAAGGATACCCTAGTTCTGAGGTATCTAACTCCACATGGAAAATGGCAAATTCATAGTACTT  
TTATGGATAATTTAAGAATGTTAACACTATTTCAGAGGTGGTCCGATTATTTGGTTAAATGAAGAAGATGCAAG  
AAGCGTGGGGATAAAAAGATAATGAGTGGGTTGAAGTGTTTAACGAAAATGGAGTGACTGTAGTTAGAGCAGTA  
GTTAGTAATAGAATACCCAGAGGTACAGCAATAATGTATCATGCTCAAGAACGTACAGTCTATATAAATGAGT  
CTAGATTAAGGGGAATCATTGGAGGTTCCCATAAATGCGGTTACTATGGTTAACATAAAAACCAACGTGGTTAAT  
CGGTGGATATGCACAACTCTCCTATGCTCTTAATTATTATGGAGCAGTTGGTACTCAAAGAGATACAATAGTA  
GCTGTAAGGAGGTGGAGAACATGA

>pas:Pars\_0499-Ar nitrate reductase, alpha subunit; K00370 nitrate  
reductase 1, alpha subunit [EC:1.7.99.4] (N)

ATGCAAATCACTCGTAGACAAGTTCTTGGCCGCTGCTGCCACAATTGGCGCCGCTTCAGGGCGTGTGGCGTTGG  
CGCAGAATCTCCAGTATTTGAAGCCGCTGGCTGAGTTCCGTGAGACGAGGCTCCAGTACCCAGATCGTAGCTG  
GGAGGAGGTGTACCGCCGAGATGGCAGTACGACAAGGTGGCGAGATCTACCCACGGCGTCAACTGCACAGGA  
AGTTGCTCGTGAACGTCTATGTGAAGGACGGGCTTATCGTCTGGGAGTTGCAGGCCACAGACTATCCCGACA  
TCGCGCCAGATATACCCAACACTACGAGCCTAGGGGTTGCCCCAGGGGAGCCTCCTTTTCTTGGTATGTCTACTC  
CCCGCTGAGGGTTAAGTACCCATACGTACGCGGCGTGTGATAGACATGTACCGCCGCTTTAAACAGCAGACG  
GGAGATCCAGTGGAGGCGTGGCGCCGCAATTGTGGAGGATCCCGCAAACAGAGCGGCCTATCAAAGGCGGAGGG  
GGAAGGCCGCTGGGCGAGGGTGACTTGGGACGAGGCGCTTGAGCTGGTCTCAGCCGCGTTGATATACACAAT  
CAAGAAGTACGGCCCCGACAGGATATACGGCTTTACCCCAATTCCCGCCATGAGCCCAGTCTCGTACGCAGCC  
GGCGCCCGCTTTATAGAGCTAATAGGCGGTGTGATGGGCTCGTTCTACGACTGGTACGCAGACCTGCCGCCGG  
CCAGCCCCCAGATGTGGGGCGAACAGACAGACGTCCCTGAGTCGGCCGACTGGTTCCACGCCAGTACATGAT  
TGTGTGGGGGACCAACCTCCCCTTGACCCGCACCCCCGACGCCAGATGTACACCCAGGCCAGATACAGGGGG  
GCCAAGGTGGCTGTGGTAAGCCCCGACTATAGTGAACACGTGAAATTTGCCGACATATGGGTCCCGGCGCTCC  
CAGGCACAGACGCGGCGCTGGGTATGGCAATGGGCCACGTGGCGCTTAAAGGAGTTCTACGTGGATAGGCAGTT  
CAAATGTCTGAGGGAAATACGCAAGGAGGTATACCGATCTTCCCTTCTTAGTCATCCTCGAGCCCGCTGGCGAC  
GGGACGTACCTCCAGGGGAGGTTCTTGGGGCAAGCGATGTGCCTGAGCTTAAAGACAAGGTGGGGGCCAACC

CCGAGTGGAAAGACTGTGGTCGTCCAGAAGGACGGCACACTCGCCGTGCCATACGGCTCCATCGGCTTTAGGTG  
GGACGGTAGCGGGAATTGGAATCTCCAGCTGAAGGGCATAACTGCAAAGGGCGAGGGGACATAGACCCCGTG  
CTCTCCATCATGGAAGTAGGCCGCTATGAGAAAGTTCCGGTGAAGTTCTTCGCAATGGACTTCGACGTCAAGG  
CCTTTGTGCGGGAGGTCCCGGGTAAAGATAGGCGATAAATACATCACGACCGTATTTCGACCTATTGGCGGC  
ACACCTAGGCGTCAAGAGAGGGGATCTCGGAGGGGACTACCCCGCGACTACAACGACCCCAAGCCCTATAACC  
CCGGCGTGGCAGGAGGGGATAACCGGGCTGTCCCGCATCTCGCCATAACAAGTGGCCAGGGAGTTTATGAACA  
CTGCCGTTTACTCAAAGCCGGTATTTGGGAAGCCTTCAGATCCGCCGTTCTTCGGCGACGACGCAACGCCCTG  
CGGCGGGTGGGCGATGATATTCTGGGGCCTGGCATAAACCCTGGTACCACACCGACTTGATATAACCGTTCT  
GTGCTACTGCTGGTATTGCTGGGAGGGACGCAGGGAAAGAACGGCGGGCGGTGGGCGCACTACGTGGGCCAAG  
AAAAGATAAGGACGCTTATCGGGTGGTCTACCATAGCCTTTGCCCTCGACTGGGTGAGACCACCTAGGCAACA  
AAACTCTCCTAGCTATTGGTATGTCCACACCGACCAGTGGCGCTACGACCCGGTTACCACAAAGTATTACGCC  
GCGCCTTGGGCCAAGAAGTGGGGCAACCTACACGAGATGGACGCAAACGTAATTGCGGTGAGGCTCGGCTGGC  
TTCCCTTCTACCCGTCGCTTAAAGTAAACCCGCTTGAGCTGGGCGATAAGCTGGTGAAGGAGACAACCTGCCCA  
AGGCATTACAGCAGGCGCAACTGGGCGCTACGTGGCGAGGAGGGTGGCGGAGATGTTGAAAAACGGCGAGATA  
AAGCTGGCTATCGAGGATCCCGACGCGCCGGAGAAGTGGCCAAGGGTGTCTTTGTGTGGAGGGCGAACCTCC  
TCGGCTCCTCGTCTAAAGGCCACGAGTACTTCTTAAACACCTCTTAGGCACGGACAACAACGTAATGAATAG  
GGAGGTGGCCGTGGAGGAGGGCCTAGTCAAGGAGGTAAACATACGCAAGCCCGCCCTGAGGGGAAGCTCGAC  
CTCTTAGTAGTGTGGACTTCAGAATGGCCACGTACCCGTTTACGCAGACGTTGTGCTACCCGCGGGCAGCT  
GGTACGAGAAGTACGATCTCAGCATGACAGACATGCACACATTCATACACCCGTTACCCCGGCCGTGACCC  
GCCGTGGGAGGCCAAGGCCGACTGGGACATCTTCAGAGAGCTGGCAAAGAAGTTCTCAGAGATGGCGCGCAAG  
TACCTACCGCAGGAGGCATACGACGTGGTGTAAACCGCTTTGATGCACGACTCAGCCGCGGAGATCGCCGAGC  
CCTTCGGCGAGGTGAAGGACTGGAAGAAGGGCGAGGCGGATCCAGTGCCCGGAAGACCATGGCCGCGGTGGC  
GCTTGTAAAGGAGGAGTACTGGGACGTCTACGACATGTACATCACCTAGGCCCGCTTGTAGTAACCACAGGC  
GTCACGGCTAAGGGCATAACCGCGTTTTAAGCCGGTTGAGAGCTACAAGTGGCTTGTGGAGAAAAACGGCGCGA  
CGAAGGCCGCTCCGATTACGTGCTCAGCCAATGCGCAAACGTGGGCGGATGCCCCAGCATTGAGCGGGATAA  
GCAGGCGGCAGAGGCCATGTTGGCGATATCCCCTGAGTCTAACGGCGAGGTGGCCTACATGGCTTGGAGTAAT  
CTGAAAAGGTCTGGGGTTGCCGCTAAAGGATCTCCAGCAAAGGAGCATAGGATTGCGTTTTAACGACATTG  
TGGCTCAGCCTAGGAGGGTACTACCTCTCCGGTGTGGAACGGCATTGAGGCGCCTGGCAGGACCTATTCCGC  
GTTTACCCTAAACACAGAGCGCCTCGTCCCGTGGCGCACCCCTCACAGGTAGGCAGCACTTCTACATTGACCAC  
GAGTGGTTTTAGGGAGCTGGGCGAGGCGTTGCCGACGTATAAGAGGCCATGGACAGGATCATGGCGGGACTGC  
TAGCCGGCGTTAATCTCGGCGACTGGTGGTACGACGAGAAGAAGTACAGGGTGGAGTCAGGCGGCCAGAAGTT  
CCTAGTACTGCGCTACCTCACTCCACACGGCAAGTGAATATCCACTCCGAGTTTTGGGATAACTTAATTATG  
CTCACGCTGTTCCGCGGGCGGCCAGGTTGTGTGGATCAACAACGAGGACGCCACTTGGCTGGGCATTAAGGACA  
ACGACTGGATTGAGGTATATAACGCCAATGGCGTAATTGTGGCGAGGGCAGCCGTCAGCCCTAGGATTTCCAG  
GGGACGGCCATCATGTATCAGGCCAGGAGAGGCACGTATATGTCCCATATCGCCGCTTACAGGTAAGAGG  
GCCGGCATCCACAACAGCGTCACGGTGACGCATCTAAAGCCGACTAAGATGGTGGGCGGCTACGCCAGCTGA  
GCTGGTCTTTAACTACTACGGCCCTACCGCGTGAACAGAGATACGCTAGTAGTAGTGAGGCCTGCTGGGAG  
GGTGGGCTATGA

>pcl:Pcal\_1907-Ar nitrate reductase, alpha subunit; K00370 nitrate reductase 1, alpha subunit [EC:1.7.99.4] (N)

TTGTTGGCGCTGGCTCAGAACCCTCAGTATCTAAAGCCCTGGCGCAGTTTGTAGACGCCCCGCTCCAGTACC  
CCGACAGGTCTGGGAGGATATGTACAGGAGGAGGTGGCAGTACGACAAGGTTGCCCGCTCTACCCACGGCGT  
GAACTGTACGGGTCTTGTTCGTGGAATGTCTACGTCAAAGACGGCTTGATTGTGTGGGAGCTTCAGGCCACG  
GACTACCCCGACATATCTCCCGACATTCCTCAACTACGAGCCTAGGGGGTGGCCAAGGGGTGCGAGCTTTTCT  
GGTACGTCTACTCGCCGCTTAGGGTGAAGTACCCCTACGTGAGGGGGTGTGATGGACATGTATAGGAGGTT  
TAAGCAGGAGACTGGGGACCCGTGGGAGGCTTGGAGGAGGATGTGGAAGATCCCAACAACCGCCGGCGTAT  
CAGCGGGCGAGGGGCAAGGCGGGCTGGCGCCGGGTGAGCTGGGACGAGGCGCTGGAGCTAATTGCCCGCCCT  
TGATATATACAATTAAGAAGTATGGGCCTGACAGGATCTACGGCTTACCCCAATCCCGCGATGTCGCTGT  
GAGCTACGCCGCGGGCGCCAGATTTATAGAGCTCATCGGCGGCTCATGGGCTCCTTTTACGACTGGTATGCA  
GACCTCCCGCCGGCCAGCCCCAGATGTGGGGCGAGCAAACCGATGTGCCAGAGAGCGCAGACTGGTTCCACG  
CCAGTACATGATTGTGTGGGGGACGAACCTCCCCATGACTCGTACCCCGACGCACAGATGTACACCCAGGC  
CAGGTACAGGGGGGCTAAGGTGGCCGTGGTAAGCCCAGACTACAGCGAACATGTGAAATTTGCAGATGTGTGG  
GTGCCGGTGGCCCTGGCACAGACGCCGCTTTGGCCTAGCGGCGGCCACGTGGCGCTTAAAGGAGTACTACG  
TGGACAAGCAGATTAAGTGTCTGAGGGAGTACGCGAGGCGGTACACCGATTTGCCGTTCTTAGTCTCTCGA

GCCGCTGGGCGATGGGACCTACGCCTATGGCCGCTTCTTAAGGGCCTCAGACGTGCCAGAGCTCAAGGACAAG  
GTTGGCCAAAACCCCCGAGTGGAAAGACTGTGGTGGTGCAGAGTGACGGATCGCTGGCGGTGCCCTACGGCTCTA  
TTGGGTTTAGGTGGGATGGTAGCGGCAAGTGAATCTCCAGCTGAAGGGGATAACGGCGAGGGGCGAGGGGGA  
CATCGACCCTGTGCTCTCGGTGATGGAGCTTGGGAAGTATGAAAAGGTGAAGGTCAAGTTCTTCGCCGTGAC  
TTTGACGCAAAGGAGTTTGTGAGAGAGGTCCCGGCCATTAAGTGGGCGATAGGTACGTACCACGGTCTTCG  
ACCTCTTGGCGGCCATCTGGGGGTGAGGCGGGGCGACCTCGGCGGCGACTACCCCGCCAGCTACGACGACCC  
CAAGCCTTTACGCGCGGTGGCAGGAGGCCATCACAGGCGTGTCTAGGCAGCTGGCCATAACAAGTGGCGAGG  
GACTTCATGAACACCGCAATTTACTCGAGGCCGGTCTTCGGCAAGCCGAGCGACCCGCCCTTCTTCGGCGACG  
ACGCCACGCCTTGGCGCGGAGGGCCATGATCTTTGTGGGCGGGGATAAACCCTGGTACCACGCAGACAT  
CATTACCGCTCTGTGCTGTTGCTGGTGTTCCTCGGCGCAACGCAGGGCAAAAACGGCGGCGGGTGGGCCAC  
TATGTGGGACAGGAGAAGATTAGGACTTTGATCGGCTGGTCTACGCTGGCCTTTGCCCTGGACTGGGTGAGGC  
CGCCTAGGCAACAGAACTCTCCAGCTACTGGTACGTGCACACTGACCAGTGGCGCTACGACCCAATAACCAC  
TGACAAGATTTACCCAGCGCCGTGGGCTAAGAAGTGGCGCAATATGCATGAGATGGACGCCAACGTAGTCGCG  
GTGAGGCTGGGCTGGTTGCCGTTTTACCCAACCTCTCAACGTCAACCCATTGAGCTTGGGAGCAGACTGGTGC  
AAGAGGCGAGGCAGGCGGGGGTACCCGACGCGCAACTGTGCGCCTACGTGGCTAGGAGGGTAGCCGAGATGCT  
TAAAAGCGGCGAGGTCAAATTCGCAATAGAGGACCCAGACGCGCCGGAGAATTGGCCAGGGTGTGTTTCGTC  
TGGAGGGCAACCTCATGGGCTCCTCGTCCAAGGGGCACGAGTACTTCTCAAGCACCTACTTGGCACAGACA  
ACAACGTAACGGCTGAGGAAGTGGGGACAAAGCTTGTGAAAGAGGTAAACGTGAGGCCAGCTCCCGAGGGCAA  
GCTAGACCTCCTTGTGGCAATAGACTTCCGCATGGCCACGACCCCGTGTACGCAGATGTGGTCTGCCGACG  
GCCACGTGGTATGAGAAGTACGACTTGTCTATGACAGACATGCACACCTTTATCCACCCGTTTACCCCGCCG  
TGGATCCGCCGTGGGAGGCCAAGAGCGATTGGGAGATCTTCAAGGCGTTGGCTAAGAAGTTCTCTGAGATGGC  
GCCTAAGTACCTCCCGCAGGAGGCCTTTGACGTAGTTATGACGCCGTTGATGCACGACTCGGCGGCGAAATT  
GCACAACCATAACGGCGAAGTGAAGGACTGGAAGAAGGGCGAGGCGGATGTAGTACCAGGCAAGACTACGCAGA  
ACGTGTGCTGGTGGAGGAGGAGTATTGGGACGTGTACGACATGTATGTGTCGCTGGGCGCGTGGTGGTTAC  
AGTGGGCCTATCGGCCAAGGGCATTCCGGCGTTTTAAGCCAGTGAACAGTACAGCTGGCTTAGGGAGAGGAAC  
GGCGTGTCCAGCCTACCTCGGACTACGTGAAGACGCAGTGTGCAATGTAGGAGGCTGTCCGAGCATTGAGC  
TAGATAAACAGGCCGCCGAAGCCATCTTGGCCATCTCGCCGAGTCCAATGGCGAAGTGGCCTACATGGCGTG  
GTCAAACCTGGAGAGAGTGGTGGGCTCTCGCTTAAGGACCTCCCGCCAGGGAGCTCCGCATCACGTTTTCGAC  
GACGTCGTCGCTCAGCCGAGGAGGGTACGACGTGCGCTGTGTGGAACGGCATTGAGGCGCCTGGGAGGACGT  
ATTCGCCGTTTACTGTGAACACGGAGCGCCTAGTGCCTTGGCGCACTTTGACGGGAAGGCAGCACCTCTACAT  
TGACCACGAGTGGTTTAGGGAGTTGGGAGAGTCGTTCCCCATATATAAGAGGCCTTTGGATGTGCTGTTGGTG  
AACGTTGTTAAACAAGTTTGCCAGCGTGTGACACTTCTGGTACGACCTTGCCAAGTATAGGAGGGAGGTGGGGG  
GCGAGCGGAGGCTTGTGTTGCGCTTCTTACGCGCCATGGGAAGTGAACATAACACTCTGAGTACTGGGACAA  
CCTCATTATGCTCACGCTGTTTAGAGGTGGGCAGGTGGTCTGGCTCAACGACGAGGACGCCAAGTGGGCTGGC  
ATAAACGACAACGACTGGATAGAGGTGATCAACGCAAACGGCGTAATTGTGGCTAGGGCCGCCGTGAGTCCCA  
GGATTCGAGGGGCACCGCGATTATGTACCACGCCAGGAGAGGCACGTGTATGTTCCACTTTCTCCCACCAC  
TGGAAAGCGCGCTGGCATTCAACAACAGCGTTACTATTACTCACTTAAAGCCCACTAAGATGGTGGGCGGCTAC  
GCGCAACTAAGCTACTCCTTTAACTACTACGGCCCCACTGGCGTAAATAGGGATACTCTTGTGGTAGTAAGAA  
AGGCGAGTGGGGTGGAGCTATGA

>sim:M1627\_0832-Ar nitrate reductase, alpha subunit; K00370 nitrate reductase 1, alpha subunit [EC:1.7.99.4] (N)

ATGACATGGCAAAAATTTGAAAATAAAGGACGCGAATGGGAAGAGTTTTACAGGCAAAGATGGGCTTATGCAA  
AGGCAATTAGATCTACACATGGCGTTAACTGTACGGGGTCTTGCAGTTGGCTGATATATGTAAAAGATGGTAT  
TATAATTACAGAAATGCAAGCACTAGATTATCCTATTATAAATGAGGAAATTCCACCTTATGAACCTAGAGGA  
TGTCTTAGAGGAGCCAGCTTTTCTGTTGATGAATATGCACCTCATAGAATAAAACATCCTTATATTCGTAAGC  
AACTACTTAAGTTATGGAGAGAAGAATTAGAGAAGACAAAAGATCCTATCAAAGCTTGGGAAAATATAGTCGA  
AGATCCGGAAAAGGTCAAGCTCTATAAGGAGAATAGAGGTAAAGGCGGATTCGTTAGAAATTAGTTGGGATGAA  
GTCGAGGAGTTAGTTTCTGCTGCGTTAATATATACGATTAATAAATACGGACCAGATAGGATTGCTGGTTTTA  
CACCAATACCTGCCATGTCAATGGTTAGTTATGCTGCAGGAACTAGATTTTTATCATTAATAGGAGGAGTAAT  
AATGAGTTTCTATGACTGGTATGCGGATTTACCTATAGCTTCTCCTCAAGTATGGGGCGAACAACTGATGTT  
CCAGAAAGTGTGATTGGTTTAACTCTACCTATATAATAGATTGGGGAACCAACATTCCTCAAACAAGAACAC  
CAGATGCTCATTCTCTCCGAAGTCAGATATAGAGGAACTAAGGTAGTTGCGATTTCTCCGGATTATGCGGA  
ATATGTAAAATTTGCAGACTTATGGCTACATCCTAAACCTGGTACTGACGGAGCACTAGCTTTAGCTATGGCG  
CATGTAATAGCTAAAGAGTCCATGTTGATAGGCAAGCGAAGTACTTTACAGAATATTTAAAGAAGTATACCG

ATGCTCCATTTTTAGTAATCTTGGAAACAACAAAATGGAAGAGTTATATCTGGAAGATTTCTTAGAGCATCTGA  
TATTATTGAAAACGTAATAAATGGAGAATGGAAGTTAGTAGTATATGATACATTAAGGGGAGATTCGTAATT  
CCAAATGGATCTATAGGGTTCAGATGGTCAGACGAAAAGAAATGGAATCTAAAAC TACAAGATAGCTTAACGG  
GAGAAAATATAGAACCAGCTTTAACATTTCTAGGGATAGAAGATCAAAGGATGATGATATCTCTCACTAGACT  
TGATGAGAAAGGATTTATAGAAAGGGAAATCCCTGTCAAAC TAGTAAAATTAGCTAATGGTAAACAAATTTAC  
GTTACAACAGTATTTGATTTATTATTAGCCAATTTAGGTGTTAGAAGAGGAGATCTGAAAGGGTATCCAAC TA  
GTTATGACGATGATAAGCCTTATACTCCTGCTTGGCAAGAGAAAATAACGGGAGTCCCAAGGGATCTAGTAAT  
ACAAGTAGCTAGAGAATTCGCCAAGAATGCGGAGGATACTAACGGTAAATCCATGATATTAGTTGGAGCTGGC  
GTTAATCACTGGTTTAAACAGTGACCTAATCTATAGGGCTATAATAACTATTTTAAATGTTAATAGGTGCGATTG  
GAGTTAATGGCGGGGGATGGGCACATTATGTTGGTCAAGAAAAAGTTAGACCTTTTGAGGGGTGGCAAACAAT  
TGCTTTTGCAAGAGATTGGATGCTTGCTACAAGATTTCAAACACTACTACTTGGATATACATTCATTCTGAT  
CAATGGAAATATGATAGCTTAACATTAGATAAATTAACCTTAATAACACATTGTATAAACATCCAGCAGATT  
ACATAGTGTTAGCAGTAAAAAGAGGCTGGACGCCATTCTATCCACAATTTGATAAAAAATCCTCTAAATCTCTC  
TCCAGAAAATGCTATCGATAAGATTTTCATCCGGTGAAGTGAAGTTTGCAATAACTGACCCAGATAATCCAATT  
AATTTCCCGAGAATATTTTTCATTTGGAGAGCAAATTTACTGTTTTCTAGTGGAAAAGGGAGCGAATACATTC  
TAAAGCACTTATTAGGTACTCATAACAGTGTGAGTAATACTGAAGATGCTAAAGATAAGGTGACTGAAATTAC  
TTGGAGAGAACCTACACCAATAGGAAAGCTTGACCTAATAGTCGATCTTAACCTTTAGAATGGATAGTAGTGCG  
TTATATTCAGATATCGTGCTTCCAGCTGCAACATGGTATGAAAAATATGATATAAGTTCTACTGATATGCATA  
CTTTTGTTTCATCCATTTCAACCAGCTACAGATCCTTCTTGGGAAGCTAGGAATGATTGGGATATTTTCGTAAA  
TTTAGCTAAGAAATTTCTCAGAAATGGCATCGAGATATCTTAATGGAAAGCATAAGGATGTCGTCTATTTACCT  
TTATCCCACGATACCCCAGATGAAATCTCACAATCTTTAATTGAGGAGGAATTAGATCCTCCTTATATTTTCAG  
CTCATCTTGCAAGTAAGATAATCCCAAAGAGGAACCTTCGGGAATCTTATAGTCATTGAAAGAGATTATACTAA  
AGTTTACGAGATGATGATTTTCATTGGGGCATCTGATAAGAGATAAGGAATTACTTTATGTCCGCATACCCGTT  
AATTATCGTAAGGAATACGAAGAATTGAAAGAAGAATTAGGAGAGATAGATGATAGACCAGATATTAAGGAAG  
CTAAGAAAGTGGCTGAAGTAATACTTAGATTAAGCGGGCTACTAACGGTGAGGTTTCAGTTAAAGAATATAA  
ACAACCTGAAGTGA AACGAGTCTTAACCTTTAGCGATCTGTATAAAGGAATATCCGAAATAAAGATTAAGTTT  
GACGATATAATAGCTTCACCTAAAAGAGTTATAGACTCACCTATCGAGTCCGGAATAGTGAAGGAGAAAGGA  
TTTATAATCCGTTACGTTTAAATATAGAGTATGAAGTACCTTGGAGGACATTATCTGGAAGGCAACATTTTTTA  
CTTAGATCATCCGATTATAAGGGAATTAGGAGAACAGCTACCAATCTATGCACCACCTTTAGAGTATAACAAA  
GTAATTAAGATAAGGATACCCTAGTTCTAAGGTATCTAACTCCACATGGAAAATGGCAAATTCATAGTACTT  
TTATGGATAATTTAAGAATGTTAACACTATTTCAGAGGTGGTCCGGTTATTTGGTTAAATGAAGAAGATGCAAG  
AAGCGTGGGGATAAAAAGATAATGAGTGGGTTGAAGTGTTTAACGAAAATGGAGCGACTGTAGTTAGAGCAGTA  
GTTAGTAATAGAATACCCAGAGGTACAGCAATAATGTATCATGCTCAAGAACGTACAGTCTATATAAATGAGT  
CTAGATTAAGGGGAATCATTGGAGGTTCCCATAAATGCGGTTACTATGGTTAACATAAAAACCAACGTGGTTAAT  
CGGTGGATATGCACAACTCTCCTATGCTCTTAATTATTATGGAGCAGTTGGTACTCAAAGAGATACAATAGTA  
GCTGTAAGGAGGTGGAGAACATGA

>hhi:HAH\_1798-Ar narG; nitrate reductase subunit alpha (EC:1.7.99.4);  
K00370 nitrate reductase 1, alpha subunit [EC:1.7.99.4] (N)

ATGAGTAGAAACGACCTGACTGACGACGAAACGGACAGTGCGGGAATCAGTCGCCGCGACTTCGTGCGCGGTC  
TCGGAGCCGCGTGCCTGCTTGGCGCGACGGGGCTGTCTTCGCCGACGACGGCATGGACGGCCTCGAAGCGGT  
CGACGACCCCATCGGGTCGTATCCGTATCGGGACTGGGAGGACCTCTACCGCGACGAGTGGGACTGGGACTCC  
GTCGCCCGCTCGACCCACAGCGTCAACTGCACCGGCTCCTGTTCGTGGAACGTCTACGTCAAGGACGGCCAGG  
TCTGGCGCGAGGAACAGGCCGGCGACTACCCGACGTTTCGACGAAAGCCTCCCGACCCGAACCCGCGCGGGTG  
CCAGAAAGGGGCTGTTACACGGACTACGTCAACGCCGACCAGCGCGTGTCCACCCCTTGCGCCGACCCGGC  
GAGCGCGCGAGGGCCAGTGGGAGCGGATTAGCTGGGACGAGGCGCTGACCGAAAATCGCCGACCACGTCATCG  
ACGAGGTGCAGGCGGGCCGGTACGACGCCATCTCCGGGTTACGCGGATTCGGCGATGAGCCCGGTGTGCTT  
CGCCTCCGGCTCCCGCTCGTCAATCTGCTGGGCGGGCTCTCGCATAGCTTCTACGACTGGTACTCGGACCTC  
CCCCGGGACAGCCGATCACCTGGGGCACCCAGACGGACAACGCCGAATCCGCCGACTGGCACAACCTCTGACT  
ACATCATCGCCTGGGGTTCGAACATCAACGTACGCGCATCCCCGACGCGAAGTACTTCTCGACGCCGGCTA  
CGAGGGCGCAAAGCGGGTCGGTATCTTACCAGTACTCCAGACGGCCATCCACACCGACGAGTGGCTCTCG  
CCCCACGGCGGCAGCGACACCCGCGCTCGCGCTGGGCATGGCCAGACCATCGTCGACGAGGGGGCTGCACGACG  
AGGAACACCTCAAAGAGCAGACCCGACATGCCGCTGCTCGTCCGGGAGGACACCCGGCAAGTTCTCCGGGCGAG  
CGAGGTCCGCTCGCCGAGGACGCCGACCCGGACAAGGTGTTCGTTCATGGTTCGACGCCGACGGCAACCTC  
CGTCGTGCACCCGGTTTCGTCGGCGAGCGGGACGGCCAGAAGGACTACTCGTTAAGTATCGAACTCGACTTCG



ACCCGCAGCTCTCGGTTCGAGCGTAGTGTTCGACACCGACGAGGGCAGCGTTCGCGGTCCGGTTCGGTCTGGGAGAA  
CCTCACTGACGAACTCAGTCAGTACACGCCGGACGTTGTCCACGAAGAGACCGGCGTGGGACGAACACCTAC  
CAGCGGGTTCGCCCAGGAGTTCGCCCAGGGCCGACGCCCGGAAAATCATCCACGGCAAGGGCGTCAACGATTGGT  
ACCACAACGACCTGGGCAACCGCGCCATCCAGTTGCTCGTGACGCTGACGGGCAATCTCGGCGACCCCGGCAC  
CGGACTGGACCACTACGTGGGCCAGGAGAAGATCTGGTTCGTTCCACGGCTGGAAGGTGCTCTCGTTCGCGACC  
GGAAACGTCCGCGGGCGTCCGACGACGCTGTGGACCTACTTCCACGGCGGCATCCTCGACAACACTGATCCGG  
ACACCGCAGAGAAGATACGCGAGTCCATCGACAAGGGATGGATGCCGGTCTACCCCGAGGAGCGCGAGAACGG  
GAGCCGACCGGACCCGTCCACGATGTTTCGTCTGGCGCGGGAACACTTCAACCAGGCCAAGGGCAACGTTCGCC  
CTCGAAGAACAGCTCTGGCCAAACTCGATCTCGTTCGTTCGACATCAACTTCCGGATGGACTCGACGGCGATGT  
ACTCCGACATCGTCTGCGGGCGGCCAGCCACTACGAGAAGTACGATCTCTCGGAGACGGACATGCACACCTA  
CGTGCACCCGTTACGCGCGCCGTGCAACCGCTCGGCGAGGCCAAGACCGACTGGGAGATATTCCGCCTGCTC  
GCCGAGAAGATAACAAGAGCGCGCCAGGAACCGGGTGTTCGAGCCGATCGAGGACCGCAAGTTCGACCGAACCA  
TCGATCTCACGACCATCTACGACGACTACGTCCGCGACTGGGAGACCGCGAGGAAGAAGGGCTCGTTCGAAGA  
CAAAGCCGCGGGCGGAGTTTCATCCTCGAACACTCCGAGGAGACCAACCCCGAGGGTAGCGACGAGCAGATAACC  
TTCGACGACATCGACGAGCAACCACAGCGGTTCTCGAAGCCGGCGACCACTGGAGTTTCGACATCAAGGACG  
GCGAGGCCTACGTCCCGTGGCAGGACTACGTCCACGACAAGAACCCTGGCCGACCTTACCGGCCGCCAGCA  
GTACTACATCGACCACGACTGGTATCTCGAACTCGGCGAGGAACCTCCCGACCCACAAGGAGGGGCCGAGAAC  
ACCGGCCGGGACTACCCGCTGTCGTACAACACGCCTCACGGTTCGTGGTCCATCCACTCGACGTGGCGCGACG  
ACCCCAAGATGCTCAGGCTCCAGCGGGGGGAGCCGGTGGTGTACATCAACCCCGAGGACGCCGAAGAACCGCGG  
CATCGAGGACGGCGACACCGTGGAGGTGTACAACGACCTCGGCGCGGTAGAGGTGCAGGCCAAAATCTACCCC  
TCCAGCGAACCGGGGACCGTTCGGCACTTCTTCTCCTGGGAAAAGTTCAGTACCCCGACCGGGACAACCTTCA  
ACACGCTCGTCCCGATGTACATGAAGCCGACGCGAGTTGGTCCAGTACCCCGAAGACACCGGGGAACACCTGCA  
CTTCTTCCCGAACTACTGGGGGCCGACCGGGGTCAACAGCGACGTGCGCGTGGACGTGCGGCCACCGGAGGT  
GACACCGAATGA

>hma:rrnAC1199-Ar narG; nitrate reductase subunit alpha; K00370 nitrate reductase 1, alpha subunit [EC:1.7.99.4] (N)

ATGAGTAGAAACGACCTGACCGACGACGAGGGGGACAGTGCTGGAATCAGTCGCCGCGACTTCGTTTCGTGGCC  
TCGGAGCCGCATCGCTGCTTGGCGCGACGGGGCTGTCTTCGCCGACGACGGCATGGACGGCCTCGAAGCGGT  
CGACGACCCCATCGGGTTCGTATCCGTATCGGGACTGGGAGGACCTGTACCGCGACGAGTGGGACTGGGACTCC  
GTCGCCCGCTCGACCCACAGCGTCAACTGCACCGGCTCCTGTTTCGTGGAACGTCTACGTCAAGGACGGCCAGG  
TCTGGCGCGAGGAACAGGCCGGCGACTACCCGACGTTTCGACGAGAGCCTCCCGACCCCAATCCACGGGGCTG  
CCAGAAGGGGGCGTGTACACCGACTACGTCAACGCCGACCAGCGCGTGTCCACCCCTTGCGCCGACGGGC  
GAGCGCGCGAGGGCCAGTGGGAGCGGATTAGCTGGGACGAGGCGCTGACCGAAAATCGCCGACCACGTCATCG  
ACGAGGTGCAGGCGGGCCGGTACGACGCGATTTCCGGCTTTACCCCATTCGCGCCATGTCCCCAGTAAGCTT  
CGCCTCCGGCTCCCGGCTGGTCAATCTGCTCGGCGGTGTCTCCCATAGCTTCTACGACTGGTACTCGGACCTG  
CCGCCGGGCCAGCCGATTACGTGGGGCACCCAGACGGACAACGCCGAGTCCGCCGACTGGCACAACGCCGATT  
ACATCATCGCCTGGGGGTGCAACATCAACGTACGCGCATCCCCGACGCGAAGTACTTCTCGACGCCGGCTA  
CGAGGGCGCAAAGCGGGTTCGGTATCTTACCGACTACTCCAGACGGCCATCCACACCGACGAGTGGCTCTCG  
CCCCACGGCGGCAGCGACACCGCGCTCGCGCTGGGCATGGCCAGACCATCGTTCGACGAGGGACTGCACGACG  
AGGCACACCTCAAAGAGCAGACCGACATGCCGCTGCTCGTTCGGGAGGACACCGGGAAAGTTCCTCCGGGCGAG  
CGAGGTTCGCCCTCGCCGAGGATGCCGACGACCCCGAGAAGGTCTTCGTTATGGTTCGACGCCGACGGCACCCCTC  
CGTTCGTGCACCCGGTTCGCTCGGCGAGCGGGACGGCCAGAAGGATTACTCCGCGAGCATCGAACTCGACTTTCG  
ACCCGCAGTTATCGGTTCGAGCGGAGCGTTCGATAACCGACGAGGGCAGCGTTCGCGGTCCGGTTCGGTCTGGGAGAA  
CCTCACCGACGAGCTCAGCCAGTATACGCCGGACGTTGTCCACGAAGAGACCGGCGTTCGGCGAGAACACCTAC  
CAGCGAGTTCGACGAGTTCGCCCAGGGCCGACGCCCGGAAAATCATCCACGGCAAGGGCGTCAACGACTGGT  
ACCACAACGACCTTGGCAACCGCGCCATCCAGTTGCTCGTGACGCTGACGGGGAACCTTCGGCGACCCCGGCAC  
CGGACTGGACCACTACGTTCGGCCAGGAGAAGATCTGGTTCGTTCCACGGCTGGAAGGTGCTCTCGTTCGCGACC  
GGAAACGTCCGCGGGCTCCCGACGACGCTGTGGACCTACTTCCACGCAGGTATCCTCGACAACACTGATCCGG  
ACACCGCAGAGAAGATACGCGAGTCCATCGACAAGGGATGGATGCCGGTCTACCCCGAGGAACGGGACGACGG  
GAACCGACCGGACCCGTCCACGATGTTTCGTCTGGCGCGGGAACACTTCAACCAGGCCAAGGGCAACGTTCGCC  
CTCGAAGAACAGCTCTGGCCAAACTCGATCTCGTTCGTTCGACATCAACTTCCGGATGGACTCGACGGCGATGT  
ACTCCGACATCGTCTGCGGGCGGCCAGCCACTACGAGAAGTACGATCTCTCGGAGACGGACATGCACACCTA  
CGTGCACCCGTTACGCGCGCCGTGCAACCGCTCGGCGAGGCCAAGACCGACTGGGAGATATTCCGCCTGCTC  
GCCGAGAAGATAACAAGAGCGCGCCAGGAACCGGGTGTTCGAGCCGATCGAGGACCGCAAGTTCGACCGGACCA

TCGATCTCACGACCATCTACGACGACTACGTCCGTGACTGGGAGACCGGCGAAGAACAAGGGCTCGTCGAAGA  
CAAAGCCGCGGGCGGAGTTTCATCCTCGAACACTCTGAGGAGACCAACCCCGAGGGCAGCGACGAGCAGATAACC  
TTCGACGACATCGACGAGCAACCACAGCGGTTCCCTCGAAGCTGGCGACCACTGGAGTTCGACATCAAAGACG  
ACGAGGCGTACGTCCCGTGGCAGGACTACGTCCACGATAAGAACCCTGGCCGACCTTCACCGGCCGCCAGCA  
GTACTACATCGACCACGACTGGTATCTCGAACTCGGCGAGGAACCTCCCGACCCACAAGGAGGGGCCGGAGAAC  
ACCGGCCGGGACTACCCGCTGTCGTACAACACGCCTCACGGTTCGTTGGTCCATCCACTCGACGTGGCGCGACG  
ACACCAAGATGCTCAGGCTCCAGCGCGGGCAGCCCGTGGTGTACCTGAACCCCGAGGACGCCCAGCAGCGGGG  
CATCGAGGACGGTGCACCCGTGGAGGTGTACAACGACCTCGGGAGCGTGCAGGTGCAGGCGAAGATCTACCCC  
TCCAGCGAACCGGGGACCGTCCGGCACTTCTTCTCCTGGGAGAAGTTCAGTACCCCGACCGGGACAACCTTCA  
ACACGCTCGTCCCGATGTACATGAAGCCGACCCAGCTGGTCCAGTACCCGGAAGACACCGGGGAACACCTGCA  
CTTCTTCCCGAACTACTGGGGGCCGACCGGGGTCAACAGCGACGTGCGTGTTCGATGTCCGACCGAGCGGAGGT  
GACACCGAATGA

>ape:APE\_1288.1-Ar narG; nitrate reductase alpha subunit; K00370 nitrate  
reductase 1, alpha subunit [EC:1.7.99.4] (N)

TTGTCTCAGCAGAAGGGTGAAGGCAATGGTGGAGGTCTGTCAAGCTGAGCAGGCGCGGCTTCTTGAAGGTGC  
TCGCGGCCCGCGGCTGCTGTCGAGCCTCGGCCCGCTGGCTTCCGCTCTCTCCAGCAACAGATATCTCACCAC  
AATCGAGACCCCCGCTCGGCTACCCCGAGGACCTCAGGGGCTGGGAGAAGTTCACAGGACATGTGGGCC  
TATGATAAGGTGGCGAGGAGCACCCACGGAGTCAACTGTACTGGGAGCTGCAGCTGGATGGTTTACGTCAAGG  
ACGGTATAGTAGCTTACGAGCTCCAGGCTGGCGACTACCTGACATAGGGCCCAGCTACCCCAACTACGAGCC  
CAGGGGCTGTCCCAGGGGTGCAAGCACCTCCTGGTACCTCTACAGCCCCTTGAGGGTGAAGTACCCCTACGTC  
AGGAAGCCTCTCCTGGAGCTTGGAGGGAGGCTAGGAGCAGCTACAGCGATCCTGTGGAGGCCTGGGCTGGTA  
TAGTCGAGGATCCTGATAAGAGGAGCAGGTATGTGAGGGCGAGGGTCTTGGAGGCTGGGTGAGGGCCGACTG  
GGACACCGTTCTGGAGATAATAGCCTCGGCCCTCGTGTACACAATCAAGAAGTACGGGCCCGACCGGATATTC  
GGCTTACCCCCATAACCGCAATGAGCCCCGTAGCTACGCCAGCGGCGCCAGGTTTCATAGAGCTAATAGGAG  
GCTCCATGGGCAGCTTCTACGACTGGTACGCCGATCTTCCGCGGCGAGCCCCAGGTTTGGGGTGGAGCAGAC  
GGACGTCCCGGAGAGCGCTGACTGGTTCAACGCAGCCTACATTATAAACTTCGGCACCAACATACCGATGACC  
AGGACTCCGGACGCCAGTTCTTACGGAGGTTAGGTACAAGGGCACGAAGATCGTGGTGGTGGAGCCAGACT  
TCAGCGAGCACACCAGGTTCCGCCAGCTCTGGGTCCCCATTAAGGAAGGCACCGACGGGGCCTTCGCCATCTC  
TATGGCGCACGTTATACTGAGGGAGTACTACGTGGAGAGGCAGGTAGACTTCTTCATAGACTATGTCAAGAGG  
TTTACAGACCTGCCCTTCTGATCGTGTGGAGCCCTATGAAGGCGGCTACAGGCCCGGCAAGTTTCTGAGGC  
TCTCCGACCTACACCCCGAGGAGTACTACAGCGAGGGCTACAGCGGCGAGCCTAACAAAGGAGTGAAGCTCCT  
CGTGTACGACTCGAACACAGGCAGGCCGAGGCTTGTGAACGGGAGCATAGGCTACCGGTGGGACGGCAGCGGC  
AAGTGAACCTCAAGCTCGAAGACCCGATCACCGGGGAGCCTGTGGACCCGAAGCTCTCCTTAATAGACGATA  
GCGACGAGGTGGTGTAAAGTTCCCGGTGTTCCGGGCCCTCCTTCGGCGAGAAGGGCATAGTGGAGAGGGG  
TGTGCCGGCGAAGAGGGTGAAGCTCGCCGACGGCAGCGAGGCCCTTGTGGCCACGGTGTTCGACCTCCTGGCG  
GCCTATCTGGGCGTTGACAGGGGCCCTCCCGGCGACTATCCGGCGGGATACGATGATAAGAAGCCCTTACCC  
CGGCTTGGCAGGAGGACATAACCGGTGTGAGCAGGGAGCTCGCCATAAGACTCGCCAGGGAGTGGGCTGACAC  
GGCGGTGAAGACCCGGGGCAGGGTCATGGTCATGCTGGGCCCGGGCGTCAACCACTGGTTCACAGCGACCTC  
CACTACAGGGCCATACTGACCCTAGTCAAGCTGACTGGAGCGGAAGGCAGGAACGGGGGAGGATGGGCCCACT  
ACGTCCGCCAGGAGAAGATCAGGACGATAGCGGGCTGGGCCAAGCTGGCCTTCGCCCTGGACTGGGTCTTGCC  
GCCGAGGCACCGAAGACGCCCGAGCTTCTACTACGTCCACACGGACCAGTGGAGGTATGACAGGCTGACCACG  
GACTACTATGAGGGGCCCTGGAGCGACGTGAGGGAGAAGATGAAGTGTAGCCACCCGATGGACTGCAACATAA  
AGGCCGCCAGGCTGGGCTGGCTACCCTTCTACCCCCAGTTTAAACAGGAGCACGCTGGACCTAGCGGCGGAGGC  
TAGGAGGCTTGGGAAGGATCCCGTGCAGCACGTGGTAGACCTTCTGAAGAGCGGCCAGCTGAAGCTGGCGATA  
GAGGACCCCGACGCCCTGAGAAGTGGATTAGGGTCATGTTTCGTCGAGGGGCTAACCTCCTCGGCAGCAGCG  
GCAAGGGCCACGAGTACTTCTGAAGCACCTGCTGGGGAGCCCGATGGCCCAGCCTATGAGCGAGGAGGTGGA  
CAGGAGCCTCATCAAGGAGGTTGTATGGAGGGCCGCCCCGAGGGGAAGCTGGACCTCCTGGTGGCAATAGAC  
TTCAGGATGGCCACCACCCGATATACGCCGACATAGTGTCCCGCCGCGACATGGTATGAGAAGTACGATC  
TGAGCATGACAGACCTCCACACGTTTCTACACCCCTTACCCCCGAGTGGACCCGCTTGGGAGAGCAAGAG  
CGACTGGGACATATTCAAAAGAGCTGGCGAGGAAGTTCAGCGAGATAGCCGCAACCACTTCCCAGACGAGGTC  
GAGGACATCGTAGCCAGGCCCTCTGGCACGACACGCCATGGAGATAGCCAGCCCTACGGTGTGAGAAAGG  
ACTGGAGGTATGGCGAGACGGAGCCGGTGGCCGGGCAAGACGATGTGGGACCTTAAAGTGGTTAAGAGGGACTA  
CAGGAACGTGTACAAGATGTTTATAAGCCTGGGGCCGAAGGCCAGGAAGGCCGGCGTCAAGGGAGTAAGCTAC  
GACACCAGCGACATCTACGAGATGCTGAAGGAGGACCTGGGCGTAGTGTACTGGGAGAAGTGTCCCGACGGCT

GTCCAAGCGTAGAGAGCGACAAGAACGCAGCCGAGGCTATACTAGCCCTGAGCCCTGAGGCCAACGGCCTGGT  
GGGTGAGAGGAGCTTCGCCAGCCTCGAGGCCAAGGCTGGCGTGCCGCTAAAGGACCTGGCGAAGAGTAGGGAG  
TGGTATAAGTTCGACGACCTTGTAGGCCAGCCTAGGAGGTCCCACACGAGCCCGATGTGGAGCGGTATAGAGG  
ACTTCAACAGGGCCTACGCACCCTTACCATAAACACGGAGAAGCTGGTCCCCTGGAGGACCCTCACCGGTAG  
GCAGCACTTCTACCTCGACCAGACTGGTTCATAGCCCTCGGAGAGATGCTGCCTACCTACAAGCCTCCCCTT  
GACCCTGTTAGGCTCGGCTACCTGAAGAACGCTGCGGCGAGGCTTGGGATCACGAGGATGAACGGCTACAGGA  
TCGAGGAGGGCGGCAGGAGGTATCTCTTGCTGAGGTACCTCACGCCCCACGGTAAGTGAACATAACACAGCGA  
GTTCTGGGACAACCTGAAGATGCTGACCCTGTTTCAGGGGAGGCCAGGTGGTGTGGCTGAACGACGAGGACGCG  
AGGTGGGCCGGGATAGAGGACAACGACTGGGTGGAGATAGTAAACGACAACGGAGTCATAGTGGCGAGGGTCCG  
CCACCAGCCCGAGGATAACCAAGGGGGTCCGATAATGTACCACGCCCAGGAGAGGCATATCTACGTCAGGCC  
GAGCAAGCTAACCGGCAAGAAGGGAGGGATCCACAACAGCGTCACCAGGGCAGACCTTAAGGTCAACCTCATG  
GTGGGAGGCTACGCGCAGCTGAGCTACTTCTTCAACTACTACGGCCCCGACGGGTGTCGACAGGGACACCATGG  
TTATAGTATACCTACACGACAAGCTAGGCGCCAAGGCACCCCAGCCTGGAGCCTAG

>hvo:HVO\_B0164-Ar narG; nitrate reductase, catalytic subunit  
(EC:1.7.99.4); K00370 nitrate reductase 1, alpha subunit [EC:1.7.99.4]

(N)

ATGAACCGAACGAACACCTCGACCCCCGACGACGAGTCGGGAACGGACGAATCGCAAGCCGAACAGACGGACG  
ACCCGCCGGCGGTTCGGTGACCCGCCGGGAGAGCCGGCGACCGAGGGAACGAGCGTCTCCCGTCGTCGGTTCCT  
CGAAGGCGTCGGAATCGCCTCGCTTCTCGGCATCGGCCGTCGCGTCCGCTGCCGACGACGACCCGCTGTTCCAGATG  
GGCGGGCTGAACCCCGTCGACGACCCCATCGGGAACACCCCTACCGGGACTGGGAGGACCTTACCGCGAGC  
AATGGGACTGGGACTCGGTCTCTCGGTGCAGCATAGCGTCAACTGTACCGGCAGCTGCTCGTGGGACGTCTA  
CGTAAAAACGGGCAGGTGTGGCGCGAGGAGCAGGCCGCTGACTACCCGCGGTTTCGACGAGAGCCTGCCCGAC  
CCGAACCCCCGCGGCTGTCAGAAAGGGGCGTGTACACCGACTACGTCAACGCGGACGAGCGAATCAAACACC  
CGCTGAAGCGCGTTGGCGACCGCGGCGAGGGGAAGTGGCGGCGCATCTCGTGGGACGAGGCGCTCACCGAAAT  
CGCCGAGCACGTTCGTCGACGAGGTGCAGGCCGCTCGCTACGACGCCATCAGCGGCTTCACTCCCATCCCGGGC  
ATGAGCCCCGTCGTTTCGCCAGCGGGTTCGCGGCTCATCAACCTCCTCGGCGGCGTCAGCCACTCGTTTTTACG  
ACTGGTACTCCGACCTGCCGCCGGGCCAGCCCATCACGTGGGGCACCCAGACCGACAACGCCGAGAGCGCCGA  
CTGGTACAACGCCGACTACATCATCGCGTGGGGGTGAACATCAACGTCACCCGCATCCCCGACGCGAAGTAC  
TTCTCGAATCGGGCTACAACGGGACGAAGCGCGTTCGGCGTCTTACCGACTACTCGCAGACGGCCATCCACA  
CCGACGAGTGGCTCAGCCCCGATTCGGGCACCGACACCGCGCTCGCGCTCGGTATGGCCCGGACCATCGTCA  
CGAGGGACTGTACGACGAGGCCACCTCAAAGAGCAGACCGACATGCCGCTTTTGGTCCGGCAGGACACCGGG  
AAGTTCCTCCGCGGAGCGAGGTTCCCTCGGTCTCGACCGACGCCGACCGACCCGAGTGGATGTTGCTCATGC  
TCGACTCTGACGGACGCTCCGCGAGGCACCGGGTTCGCTCGGTGAACGCGACGGCCAGAAAGACTACTCCAA  
GAGCATCGAACTCGACTTCGACCCGCAACTGGACGGCGAAACCACGGTCCGAACCGAAGACGGGCGCGTCCGC  
GTCCGGACCGTGTGGGCCGAACTGCGGGACGAACCTCGATGACTGGGGCCCGGAGACCGTCCACGACGAGACCG  
GCGTCCGGCGAAGAGACCTACCAGCGCGTCCGCCGCGAGTTCGCCGAGGCCGACAAGGCGAAGATAATCCAGGG  
CAAGGGCGTCAACGACTGGTACCACAACGACCTCGGGAACCGCGCGCTCCAGTTGCTCGTCACGCTGACGGGC  
AACCTCGGCGAGCAGGGGACCGGCCTCGACCACTACGTCCGGCAAGAGAAGATATGGACGTTCCACGGCTGGA  
AGTCGCTGTTCGTTCCCGACGGGCAACGTCCGCGGGGTGCCGACGACGCTGTGGACCTACTACCACGCGGGCAT  
CTCGACAACACCGACGCCGACACGGCCGCGAAGATACGGGAGTCCATCGACGAGGGATGGATGCCGGTCTAC  
CCGAGGAACGCGACGACGGCTCTCGTCCCAGCCGACGACCATGTTTCGTCGTCGGCGGGCAACTACTTCAACC  
AGGCGAAGGGGAACGTCGCCGTCGAGGAGGAACGTGGGCCGAACTCGACCTCGTTCGTCGACATCAACTTCCG  
GATGGACTCGACGGCGCTGACTCGGACATCGTGTTCGCCGACCGCGAGCCACTACGAGAAACACGACCTCTCG  
ATGACGGACATGCACAGCTACGTGCATCCCTTACGCCCCGCGGTTCGAACCGCTGGGGGAGTTCGAAGACCGACT  
GGCAGATATTCGCGAACTCGCCGCGAAGATTCAGGAGGTCCGACGAGCGCGGGCTCGGGCCGATTTCCGA  
CCGGAAGTTCGACCGCGACATCGACCTCCAGTCCGTCTACGACGACTACGTCCGCGACTGGGAGACCGGGCGAA  
GCCGACGCGCTCGACGAGGACCGCGCCGCTGCGAGTACATCCTCGAACACTCCGAGGAATCGAATCCGTCCG  
AGAGCGACGACCAGATAACGTTCCGCCGACACGGTTCGAACAACCCAGCGGCTCTTGGCCCGGGCGACCACTG  
GACCTCCGACATCGAGGACGGGGCGGCGTACACGCCGTGGAAGGACTTCGTCCAGGACAAAAACCCGTGGCCG  
ACCGTACCGGCAGACAGCAGTACTACATCGACACGACTGGTTCCTCGAACTCGGCGAGCAGTTGCCGACGC  
ACAAAGAGGGGCCGACGCGGACGGGCGGCGACTATCCGATGGAGTACAACACGCCCCACGGGCGGTGGTCTAT  
CCACTCGACTTGGCGAGACAACGAAAACTGCTCCGCTCCAGCGCGGGGAGCCGGTGGTCTACCTCCATCCC  
GAGGACCGCCCGAGCGCGGCATCGAAGACGGCGACACCGTCCAGGTGTTCAACGACCTCGCGGAGGTTCGAAC  
TGCAGGCGAAGCTTACCCGAGCAGCCAGCGCGGCACGGCGCGGATGTACTTCGCTGGGAGCGGTTCCAGTT

CGACGGCGACACGAACTTCAACTCGCTCGTCCCGATGTACATGAAGCCGACGCAGTTGGTCCAGTATCCGGAA  
GACTCCGGCGAACACCTCTACTTCTTCCCAACTACTGGGGGCGACGGGGGTCAACAGCGACGTCCGCGTCCG  
ACGTGCGGAAAGGCGGGGGTATGCCGAATGA

>htu:Htur\_1649-Ar molybdopterin oxidoreductase; K00370 nitrate reductase  
1, alpha subunit [EC:1.7.99.4] (N)

ATGAGTGACGAGGAACCCGACGGGCTCGAGCTGACCCGTCGGGAACCTCGGCGCCGCGGCGGGGTATCGCCG  
GCGCGTCCGGCCTCGGTTTCTCGGCTACCGGCGGCTGACCGGCGAGGAAACCCGCGACGAGGACGGCGAGGG  
ACCGATGAACCCCTCGAGGAGTACCCAAACGAGGAGTGGGACCAGAAGTACCGCGACATCTGGGAGCCCGAC  
GACTCCTACATGCTCACGTGTACGCCAACGACACCCACAACCTGCTACCTCGAGGCCACGATCAAGAACGGCC  
AGATCACGCGCCTCGGTTCCCTCGATGAACTACGGCGAGGCGACCGACCTCGACGGCAACCAGGCCTCCAGCG  
GTGGGACCCCGCGTCTGTAACAAGGGGCTGGCGATGGTTCGAGCGCTTCTACAACGAACGGCGCGTCAAGGCC  
CCGATGATCCGTACGGGCTTCAAGCAGTGGGTTCGACGACGGCTTCCCGCGCGATTCCGACGGCTCGATGCCCG  
AGGAATATGCCCGGCGGAGAGGACGACTTTCGTCGAGGTCTCCACGAGGAAGCCCACGAGTACGCCGCCCG  
CACCTTCCCTCGAGCTCGCCGACCAGTACAGCGGCGAGAGCGGGATCCAGTTCGCTGCTCGATCAGGGCTACGAC  
GAGCGCGTTCGTCGAGGAGACGCAGGGCGCCGGCGTCCGGACGATGAAGTTCCGCGGGCGGATGCCGCTGCTCG  
GCGTCATCAAGCTGTTTCGGCCAGTACCGAAACGCCAACTCGATGGCGTTGCTGGACAACCTACGTCCGCGACGT  
TAGCGAGGACGAAGCCCTGGGCGCGATGGGGCTGGACAACCTACTCGTTCCACACCGACCTGCCGCCGGGCCAC  
ACGATGGTCACCGGTACGACGACGGTTCGACTTCGACCTCGCGAGCATCGAGTACGCGGACCACATCGTGTCTCG  
ACGGGATCAACTACCTGACCTCGAAGATGGCCGACTGTCACTGGCTGACCGAGGCCAAACTGAAGGGGTGCAA  
GGTCACCGGGATCTTACCGACTACAACGCGACGGCCTCGAAGTGGCGACGAACTCATCACGGTCCGGCCGGCG  
TCGGACACGGCGCTGTTCTCGGCGTGCAGCGCTACTCATCGAGGAAGAGCTCTACGACGAGGAGTACGTCC  
GGCAGTTCACGGACCTCCCGTGTGTTCCGCATGGACGACAACGAAGTCTCCGCGCCAGCGACCTTCCCGC  
GGACTACGAGCCCGCGGACTTAGAGAAGACCGACGCCGTCCGCCGACGACGCGGACCGCCCCGGCGTTCGACGTG  
ACGAACATCGACGATCAGGTCATCACGGAGGAGTCCGCCGCGAGTGGGGCGACTTCGTCGTCCACAACGCCG  
AGAGCGGCGAGTTCGAGCCGGTACGCGCGACGACATCGGCGACGACTTCGACGTTCCCGCGACGATCGAGGG  
CGAGTTCGAGATCGAGCTCGCCGACGGCGAGACCGTCAAGTGGCGACGGTGTTCGACCTGATCAAGGAACAC  
CTCGTCCGGCACCTGGGACCTCGAGTTCGACCCGCCGAAGTACGCGGGACCGATCCCGCAGGCGATCGAGAACCTGG  
CCCAGGACTTCGCGGACAACCCAGCAGAGCACGATGCTGCTGACCGGGATGGGGCCGAACCACTACGCGAACCG  
CGACCAGCACGGCCGTGCGGTGTTCTGCTGGCGTTCGTCGACGCGGAACGTCGGCTACCAGACGGGGAACGTC  
GGTTCCCTACTCCGGGAACTACCGGATGGCGTACTTCAACGGCGTCCGCCAGTACGCCAACGAGGATCCGTTCC  
ACGTGCAACTCGATCCCGAGGAGCCGGCCACCACCGAGAAGCGTGGGACGCCCACTCGGGCGACTTCTACAC  
GAACCTCGACAAGCCGCTGAAGGTCGACGGCGAGTACTTCCAGGGCGACTTCGCACATGCACACGCCACGAAG  
TCGATCTGGGTGTTCGGGTCGAACTCCATCCTCGGCAACCGGAAGGGGACCTACAAGATCATCGAGAAGGCC  
TGCGCACCGGCGACATCGAGGCCTTCTTACCAACGAGTGGTGGTGGTTCGATGACCTGCGAGTACTCCGACAT  
CGTCTTCCCGGCGGACTCGTGGGCCGAACACCACGTCCACGACATCACCGCCTCCGTACGAACCCCTTTCATC  
ACGACGATGCCGGAGACGGAGATCGACCGGATCTACAACACGCTCAACGACACTCAACTACAAGGGCGTCCG  
CCGAGAAGCTCGCCGAACTCACCGGCGACAGTTCGCTTCGAGGACTACTGGGCGTTCATCGACGAGGAGGAGTA  
CCAGGCCAAACCTACATCCAGCGCATCTTCGATCACTCCAACGCCGTCAAAGGGTACGACGTCGAGAACCTG  
CTGGAAGACGCCCGCGAGGGGACACCGGCGATCATCATGACCCGGACCTACCCCAAGCACGTCGGCAACGAGC  
AGACCCAGGACTCCCAGCCCTGGTACACGAAGACCGGGCGCTCGAGTTCCTCCGCGAGGAGGAGGAGTTCGC  
CGAGGCCGGCGAGCACATCCCCCTCCACCGGGAGCCGATGGACGCGACGCCCTACGAGCCGAACGTCATCGTC  
GACGACAGCGACAGTCCGGTGATCGCGCCCCGAGACCCCCGGCGACCGCGGCTGGGACAGCGAGGCGAAGGCC  
GCGACACCAACGACCGACAGGTCCGCAATGAGATCCGGTTCGCGTTCGAACTGGTTCGACACGACCCATCCCT  
GACCGATGTCGACGACGGTACGACTACGTCTACATGACGCCGAAGTACCGCCACGGGACCCACACCTTCGGC  
GCCGACCTGAAGGACATGGCCGTCTGGTGGAGCAACTTCGGCGACATGGGCCGGGAGACGGAGCGCGACTCCT  
TCGACCAGCGCAAACCGTTCGTCGGCGAGGGCTACGTCGAGATGAACCCGAGGACGCCCGCGAGGAGGGGCT  
CCAGGACGGCGATTACGTGTGGGTTCGACGCCGACCCCTCGGACCGTCCGTACCCGGGCTACGACCCCGACGAC  
GAGAAGACTGAGTACACGCGGGCGATGATGCGAGTCCGCTACCAGCCGAGCATCCCGCGAGGGGTACGCGGGA  
GCTGGATGAACGTCAGCCAGACCTCCCAAGTCTTACGAGGCCAGGAGGAACCGGAGGACGGGAAGGCCCA  
GTCCGAGGACACGAACTACGTGTGATGTACCGCAGCGGCGGTACCAGTTCGATGACCTCGACGTGGCTGCGA  
CGGACCTGGCTGACCGATACGCTGCCCGAAAGGGCATGTTTCGGACAGAACGTCGACGTCGGCTTCGAGCCCG  
ACGTCCACGCCGCCAACGGCGCGCCCAAGGAGTTCGTTTCGTCGAGATCGAGAAGGCCGAAGACGGCGGGCGTGA  
CGAGGACGGCGAGCCGATGGTGACTGGCGACCGAGTTCGGAGAGGGCGTCCGTCCGACCCAGGAGAACGACCGG  
ATGAAACAGTACCTAGAGGGCGGTTTACGAGCGAATCAGACTGA

>hxa:Halxa\_3206-Ar molybdopterin oxidoreductase; K00370 nitrate reductase 1, alpha subunit [EC:1.7.99.4] (N)

ATGAGTGACGGGGAGGCCGACGCCGAGGACGGCGGACTGAATCTGACCCGCCGAGCTCGGTGCGGCGGCCG  
CCGGACTCGCCGGCGCGTCCGGGCTCGGATTCTCGGCTACCGCCGGCTGAGTCCCGAGGAAGCCGCCGACGA  
CGAGGGCGGCCCGAGGTCGAGATGAACCCCTCGAGGAGTACCCAAACGAGGAGTGGGATCAGAAGTACCGG  
GACATCTGGGAGCCCCGACGACTCCTACATGCTCACGTGTACGCCAACGACACCCACAACCTGCTACCTCGAGG  
CGACCGTCAAGAACGGCCAGATCACCCGCTCGGTCCGTCGATGAACTACGGCGAGGCGACGGACCTGCAGGG  
CAACCAGTCTCCAGCGCTGGGACCCCCGCGTCTGTAACAAGGGCCTGGCGATGGTCGAGCGCTTCTACAAC  
GAACGCCGCGTCAAGGCCCGGATGATCCGCGAGGGGTTCAAGCAGTGGGTTCGACGACGGCTTCCCGCGGACG  
ACGACGGCTCCATGCCACCGAGTACGCCAGCGCGGGCAGGACGACTTCGTCGAGGTCTCCAGGAGGAGGC  
CCACGAGTACGCCGCTCAGACCTTCTCGAGCTCGCCAGCAGTACAGCGGCGAGAGCGGGATGGAGTCGCTG  
CTCGAGCAGGGCTACGACGAGCGCGTCTCGAGGAGACCCAGGGCGCCGGCGTCCGGACGATGAAGTTCGCG  
GCGGGATGCCGCTGCTCGGCGTCATCAAGCTGTTCCGCCAGTACCGCAACGCCAACTCGATGGCGCTGCTGGA  
CAACTACGTCCGGGACGTCTCGGAGGACGAGGCCCTGGGCGCAATGGGGCTCGACAACCTACTCGTTCACACC  
GACCTGCCGCCGGGCCACACGATGGTGACCGGCCAGCAGACGGTTCGACTTCGACCTCGCGAGCATCGAGTACG  
CGGACCACATCGTGCTCGACGGCATCAATTACCTGACCTCGAAGATGGCCGACTGTCACTGGCTGACCGAGGC  
CAAGCTCAAAGGGTCAAGCTCACCGGCATCTTACCGACTACAACGCCACGGCCTCGAAGTGCAGCAGGCTC  
ATCACGGTCCGCCCGGCGACCGACTCGGCGCTGTTCTCGGCGCCGCGCGGGTTCATCATGGAGCAGGAGCTCT  
ACGACACGGAGTACGTCCGCAAACACACGGACCTCCCGCTGCTGGTCCGGATGGACGACAACGAACCTCCTCCG  
CGCCAGCGACGTCTTCTCGGACTACGAACCCGCCGACCTCGAGAAGACCGAGGCCGCTGGCCGACGACGCCGAC  
CGGCCCGGCGTCGACGTGACGGACATCGACGATCAGGTCATCACCGAGGAACCTCCGCCGAGTGGGGCGACT  
TCGTGCTCCGCAACGACGAGAGCGGCGAGTTCGAGTCGGTACCCGCGACGACGTCGGCGACGACTTCGACGT  
CCCCGCGACGATCGAGGGCGAGTTCGAGGTGCAACTCGCCGACGGCAGCACCGTTCGAAGTCCGGACGGTCTTC  
GACCTGATCAAGGAGCACCTGACCGAGACCTGGGACCTCGAGTCGACCGCCGAGGTACGAGGGACGGACCCGC  
AGGCCGTCGAGAACCTTAGCTCAGGACTTCGCGGACAACCAGCAGAGCACGATGCTGCTAACCGGGATGGGGCC  
GAACCACTACGCGAACGCCGACCAGCACGGCCCGCCGCTTCTGCTGGCGTCGCTGACGCGCAACGTCCGGC  
TACCAGACCGGGAACGTCCGGTCTCTACTCCGGGAACCTACCGGATGGCCTACTTCAACGGCGTCGGGCAGTACG  
CCAACGAGGATCCGTTTCGATCCCGAACTCGATCCCGACCGGAGGCTCGCACCCGACAAGCGCTGGGACGCCCA  
CTCGGGCGACTTCTATACCAACCTCGACAAGCCGCTGAAGGTGACGCGCGAGTACTTCCAGGGCGACTCGCAC  
ATGCACACGCCCACGAAGTCGATCTGGGTGTCCGGCTCGAACTCCATCCTCGGCAACGCCAAAGGCGCCTACA  
AGATCATCGAGAAGGCCCTGCGCACCCGGCGACATCGAGGCCTTCTTACCAACGAGTGGTGGTGGTCGATGAC  
CTGCGAGTACTCCGACATCGTCTTCCCGGCGGACTCGTGGGCCGAACACCACGTCCACGACATCACCGCCTCC  
GTCACGAACCCCTTCATCACGACGATGCCGGAGACGGAGCTCGACCGGATCTACAACACCCTAAACGACACCC  
AACACTACAAGGGCGTCGCCGAGAAGCTCGCCGAACTCACCGGCGACGACCGGTTTACCAGCTACTGGGCGTT  
CATCGACGAGGAGGAGTACCAGGCCAAACCGTACCTCCAGCGCATCTTCGACAACCTCAACGCCGTCGAGGGC  
TACGACGTGAGGACCTGCTGGAAGACGCCCAGGAGGGGACGCTGCGATCATCATGACCCGGACCTACCCCA  
AGCACGTCCGCAACGAGCAGACCCAGGACTCCAGCCCTGGTACACGAAGACCGGGCGGCTCGAGTCTTCCG  
CGAGGAGGAGGAGTTCGCCGAGGCCGGCGAGCACATTCCTCCATCGGGAGCCGATGGACGCGACGCCGTAC  
GAGCCGAACGTTCATCGTCGACGACAGCGACAGTCCGGTGGTTCGCGCCGAGACGCCCAGACCGCGACTGGG  
ACAGCGAGGAGAAGGCCCGGACACCAACGATCGGCAGGTCCGCAACGAGGTCCGGACGCCGTCGGAACCTGGT  
CGATACCAGCCACCCGCTGACCGACCTCGACGAGGGCTACGACTACGTCTACATGACGCCGAAGTACCGCCAC  
GGGACCCACACCTTCGGCGCCGACCTCGAGGAGATGGCGGTCTGGTGGAGTAACTTCGGCGACCAGGGTTCGCA  
AGACGGAGCGGACTCCTTCGACAGCGCAAGCCGTTTCGTGGGCGAGGGCTACGTCGAGATGAACCCAGAGGA  
CGCCCGCGAGGAGGACTTACAGGATGGCGACTACGTGTGGTTCGACGCCGACCCGTCGACCGGCCGTTCCCG  
GGCTACGACCCCGACGACGAGGAGACCGAGTACACCCGCGCGTTCGATGCGGGTCCGCTTCCAGCCGAGCCTCC  
CGCGCGGGGTCACTCGCAGCTGGATGAACGTACGCCAGACGTCCCACAAGTCTACGAGGCCAGCAGGAGCG  
CGACGACGGCAAGGCCAGTCCGAGGACACGAACCTACGTGTCGATGTACCGCAGCGGCGGCCACCAGTCGATG  
ACCTCGACGTGGCTGCGCCGGACGTGGCTGACCGACTCGATGCCCCGCAAGGACATGCTCGGGCAGAACATGG  
ACGTCCGCTTCGAGCCCGACGTCCACGCCGCAACGGCGCGCCCAAGGAGTCGTTTCGTCAGATCGAGAAGGC  
CGAAGACGGCGGCGTGAACGAGGACGGCGAGCCCGGCGGCAACTGGCGACCAAGTTCGATGAGGGCGTCCGGCCG  
ACGCAGGAAGACGACCGGATGGAACAGTACCTGAAGGGCGGTTACACGAGCGAATCGGATTA

>hhi:HAH\_4416-Ar hypothetical protein; K00370 nitrate reductase 1, alpha subunit [EC:1.7.99.4] (N)

GTGAAACTGTCACGGCGGGACTTCCTGACCGCGGCTGGCGCAGGGACGGTCGGCGCGCTCGCCGAAGGTGCTT  
GGGGCGCGACACAGTCCACGGAACCGATAACGAGCGTGGACAACCCGCTCAAATCCTATCCGAACCGGGACTG  
GGAGCAGGTGTACCACGACATCTACGCCTACGACGAGGTGGACTGGACGGTGTGTACCCCAACTGCACCCAG  
TCGTGTGCGCTGAACTTCTACATGAAAAACGGCGTCCCGATACGGGCCGAGCAGGTGTATCACAACGAGGAAC  
CCTCGGTGCGCCCGTCCGGCTACGAGGACGCCGGCGTCAGCCAGCACTGGAACCCCGTGGCTGTATGAAGGG  
GCTCTCCCTGCACCGCCGGACGTTTCGAGCCGTGCGCATCAAGTACCCGATGGTCCGCAAGGGGTGGGACCC  
GAGGACCCTAACCCCGAGGGCCGCGGGCAGGACGAGTTCGAGCGCGTCTCCTGGGACGAGGCCATCGACCTCA  
TCGCCGAGAAGATGGCGAACTTAGAGGACAACAAGCGGTTCCACATCTTCAACGCCATCAAGGCAGATGGACT  
GTTACCCCGGCACGGCTCGGGCCGCCGACTGGCGTCCATCTTCGGCGGCTGTGAGTGGACCGAGTACGACTGG  
TACGCCGACCTGCCGCCGGCCACGTCATCACCCTGGTTACCAGACATCCGATTCTGACGCCGTGCGCTGGC  
GCAAAGCCGACTACACCATCATCCAGGGGAAGAACCTCATCCACAACAAGCTCGCAGACAACCCTTCTGCA  
GGAGACCCCGGAGCGCGGTGGGAAGATGGTTCGGCGTCTACCCGACTACTCGCCGACGGTCCAGAAGTGTGAC  
CGGTGGCTGCCGATCCGCCCGGGAGCGACCCGGCGTTCGCCCTCGGCATGGCCACGTCATCATGGCCGAGG  
AACTGTACGACGCCGAGTTCATGCGGAAGTTCACGAGTCTTCCCCTACTCATCCGGGAGGACACAGGCAAATA  
CCTTCGCGCACACGAGGTGTTTCGAGGACGTCGAACCGCCCGCGGAGGACATCGACGAGCAGCAGGACACAAC  
GACTGGGGCGACTTCGTGGTGTGGGTGAGGACGGCCAGCCCGTAGCGATGACCCGCGAGGAGGTTCGGCGAGG  
AGATGCCGACCACGCCACAGCTAGACGTCGACAGCGAGGTGGCACTGACCGATGGCTCGACTGTCGCCGTCAG  
GAGCGACTTCGCCCGCCAGCGGGACAACATCATCGAGAACTACGACCCGAGACGGTTCGAGGAGATCACCACG  
ATTCGGCGGACAAGCTCGCCCAGACCGCGCGGGAGTTCGCCGACGCCGAGAAGGGCCAGTGGTTACCCGGCG  
AGGGGATCAACCACTGGTTCACCTCCAACGACGCGCTCCAGCGGGCGGTGTTCCCTCGTCCAGGCGATGCTGGG  
CAACATCGGCGACGCCGGCCAGGGTACTACAACACTTCCGCCAGTACAAGATCGAACTGCTGGACGGGTAC  
CCCCACTACGTCAACCCGACGGCAACGCCGCCACGGGATGTATCCGGGCTACGCCCTTCGCCTTCTTCGGCG  
GCGAGAAACTCGACCCCCACGAGATTCGCGGGCGACTTCGACCGCGAGATGGACCTCGTCCCTCAGGGCGACGC  
CGAGGAGCCGGTGTATGCCGAAGAACGCCGGCTCGTACACGATGTCCAAGCCGTCGATCCTGTGGACGATGAAC  
TGAACTCCTGAACCAGACCAAACATCAGGAGCACGTCATCGAGAACTTCGTCAAACACCCAGACACCGAGA  
ACGACCTGTTTCATCGTCTCGGACATGCACATGACCTACTCCGCCAGACACGCCGACATCGTGCTCCCGGTGCC  
GTCTGGCTGGAGTGTGAGTACCCGACATCACCATCGGGCCGAGAACCCGTTTCGTCCAGATGGACCACGGC  
GTGATGGACCCCATCTACGACACCAAACAGGACGGGGAAAGCCGTCGCGATGGTTCGCCGAGAACTGGACGAGA  
AGATTCGCCCGGAGGAGCGAAACGTCGACTCCTACCGGGCGTACTTCGAGGAGTTCCTGGAGGAAGACGGCGA  
CGTCAAGAACTACATCCAAGAGACCTTCGACCGCGGGATGACGACCCAGAGCATCGACGTCGAGGACTTGGAG  
GATGGCCCGGAACGGCTAGACCTCAAGACCTATCCGCGGATTCGGTTCCTACTCGCAGGTCCACGAAGACCGAC  
CGTTCACACGAAGACCCGGCCGGATGGAGTTCACAAGGAGGAGGACCGGTTTCATCGAACTCGGTTCGGGACGA  
CATCGACCACGTCGAGAGCGTCGAGGGGACTCCCTACGGCGTGAACAAGAAGTGGGACGAAGCCAAGGACGAG  
GAGAACCCGCTGTATCACGACGAGGGCAACCAGTTCCTACTACAACACCCCCACCCCAAGTACCCGACCCACT  
CCTCGTGGGGGATGACGGACTGGAACCTCATCTGGGCCCTCGCGGGACTTCGGCAGCGTCAGCGGGCAGCCGGA  
GGGACCCGACCGGTTGGTTCGATGACTTCTCGTTCACCACCGGGGACGGCGAGTCCGAAGACGTCGCGCCGCTC  
GGTGAAGCGTTCGTGCGAGATGCATCCAAGCGACGCAGCAGACATCGATGTAGAGAACGGTGACTACGTCCGCA  
TCACCGCAAGCGCGGCACCTCGTTCGTGAGAGCGATGGTTCAGCGAGCGTCAGCGCCCGGGTTCGGCCGGCGA  
CATGGGACAGCTGACGCTGTGGCACGGTGGTGGCCCCAGCACTTCCCGACGACGAGGCCGACGAGGACGGC  
GTCAAGGGGTACAACACGATCACCACATCTGGCTCGATCCGCTGCAGGAGACCGACGACCTCGTCCACAAGG  
CGGTGTTTCGGCGACCCCAACGTCCTCCGACATCGTTCGACGAGGACATCGCCTGGCACGGCGCAGAAGTGGAGCA  
CGGCTACGAGGAGACGGTGTGGGCTCCGACGGGGACCAACCGGGACGACCTCGTGGACGTGGAGAAGTACGAG  
GAAGCGGACTGGTGGCCCGGCGACGCCCGCGGGACGACCTCGTTCGAGGACTACATCGGCGGGTCTTGAAC  
CCAGCGGTAGCGGCTCTGGCAGTACCAGCAGGAAGACCCCGAGGAGGCGATGACTGA

>hla:Hlac\_1335-Ar DMSO reductase family type II enzyme, molybdopterin  
subunit; K00370 nitrate reductase 1, alpha subunit [EC:1.7.99.4] (N)  
ATGACTGACACGACAAACACGTCGACGAAATCGACACGCGACGAGTCCGGTACCGCGCGCCGCGACTTCCTGA  
AGGGGGCCGGGGTGGCGGCCGCGTTCGGCGCCACCGGCTTGGGCTCCGCGCAGGACCTCACCAGATGACCGC  
GCTGGAGGTTCGTGACGACCCGATCGGCAACTACCCGATCCGCGACTGGGAGGACCTTACCAGGAGGAGTGG  
GACTGGGACGGGAAGGCCCGCTCGACGCACAGCGTCAACTGCACGGGCAGCTGCTCGTGGCAGGTGTACACGC  
GGAATGGGACAGGTGTGGCGGAGGAGCAAGCCGGCGACTACCCCGATTTCGACGAGTTCGCTCCCGGATCCGAA  
CCCGCGGGGCTGTGAGAAGGGAGCGTGTTCAGCGACTACGTGAACGCCGACAGCGCGTACGCACCCCGCTC  
CGTCCGACCGGCGAGCGCGGCGAGGGGAAGTGGGAGCGGATCTCCTGGGACGAGGCGCTCACCAGATCGCCG  
AGGAGGTCATCGACGCCGTCGAGGACGAGGAGTACGACGCGATCAGCGGCTTACCCCGATCCCGGCGATGAG

CCCGGTCTCGTTCGCCTCTGGGAGCCGCCTCGTCAACCTGCTCGGCGGCGTCAGCCACTCCTTCTACGACTGG  
TACTCCGACCTCCCGCCGGGACAGCCGATCACGTGGGGGACCCAGACCGAGAACGCCGAGAGCGCGGACTGGT  
ACAACGCCGACTACATCATCGCGTGGGGCTCGAACATCAACGTCACGCGGATCCCCGATGCGAAGTACTTCCT  
CGAAGCCGGCTACGACGGCGCCAAGCGCGTCCGCATCTTACCAGACTACAGCCAGACGGCGATCCACTGCGAC  
GAGTGGATCGGCCCCGAGCCCCGGCAGCGACACGGCGCTCGCGCTCGGGATGGCGCGCACCATCGTCGACGAGG  
GGCTCTACGACGAGGAGCATTTAAAAGAGCAGACGGACATGCCGCTGCTCGTCCGCGAGGACACCGGGAAGTT  
CCTCCGCGCGAGCGAGGTGTCCGGGCTGAGCGTGCAGCCGACCGGCCGAGAAAGGTGTTCGTCATGCAGGAC  
GCCGACGGCACCCCTCCGGACGGCGCCCGGATCGCTGGGCGAGCGCGACGGACAGCACGACCCTCCGTGAGCA  
TCGAGCTCGACTTCGACCCCGAACTCGCCGTCAAGCGCACGGTCGGCACGACCGACGGCGACATCGAGACGCG  
CTCGGTGTGGCTGAATCTCCGCGACGAGCTGTCCGAGTACACCCCGAGCGCGTCAACGAGATCACGGGCGTC  
GGCCGGCAGACTCACCAGAAGATCGCCCAGGATTCGCCGAAGTCGACCGCGCGAAGATCATCCACGGGAAGG  
GGGTCAACGACTGGTACCACAACGATCTGGGGAACCGTTCGATCCAAGTCTCGTACGCTCACGGGGAACCT  
CGGCCGACAGGGAACGGGTCTCGACCACTACGTCCGCCAGGAGAAGATCTGGACGTTCAACGGGTGGAAGAAC  
CTCTCGTTCCCGACCCGGAAGCGTCCGGGGCGTCCCGACGACGCTCTGGACGTAACACGCCGGGATCATGG  
AGAACACCGACCCGGACACGGCGGCGAAGATTCGGGAGTCGATCGACAAGGGGTGGATGCCGCTGTACCCGAG  
CGAACCGCGACGACAGCGGCCGCCCGGACCCCGAGTCATGTTTCGTCGCGCGGGAACACTACTTCAATCAGGCC  
AAGGGGAACATCGCGGTGGAAGAGGAGCTGTGGCCGAAGTCGATTTGGTTCGTCGACATCAACTTCCGGATGG  
ACTCGACGGCGCTCAACAGCGATATCGTCTCCGACGCGCGAGCCACTACGAGAAAACACGACCTCTCGGAGAC  
GGACATGCACACCTACGTGCACCCGTTACGCGCGCGGTTCGAGCCGCTGGGCGAGTCGAAGACCGACTGGCAG  
ATCTTCCGCGATCTCGCCGCGAAGATACAGGAAGTGGCCGCGGACCGCGGTACGGAGCCGGTCGACGATCGGA  
AGTTCGACCGCCAGATCGACCTCCAGTCCGTCCACGACGACTACGTCCGCGACTGGCTCGACGACGAGCCCGG  
TGCGCTGTCCGAGGACAAGGCGGCCGCGGAGTTCATCCTCGAGAACTCCGAGGAGACGAACCCCGAGGGGACC  
GACGAGCAGATCACGTTGACGAGATCGACGAACAGCCAAACGGCTCCTCGAAACCGGCGACCACTGGTTCGT  
CGGACATCGAGGAGGGCGAGGCGTACACGCCGTGGAAAGACTACGTGCAGGACAAGAACCCGTGGCCGACGTT  
CACGGGGCGACAGCAGTACTACATCGACCACGACTGGTTCCTGGAGCTCGACGAGCAGCTTCCGACCCACAAG  
GAGGCGCCGGTGTACAGGAGAAGTCGGAGTACCCGCTGGGGTACAACACGCCCCACAGCCGCTGGTTCGATCC  
ACTCGACGTGGCGCGACAGCAGCAAGATGCTCCGGCTGCAGCGCGGCGAGCCGACCGTCTACCTCAACCCCGA  
CGACGCCGAGGAGCGGGGATCGAGGACGGCGACACCGTGCGGGTGTACAACGACCTCGACTCGGTTCGAGGTG  
CAGGCGAAGATCTACCCGAGCGGGGAGCCCGGCACCGTCCGGCACTTCTTTCAGCTGGGAGCGGTTCCAGTACC  
CCGACCGCAACAACCTTCAATTCGCTCGTCCCGATGTACATGAAGCCGACGCAGCTCGTCCAGTACCCCGAGGA  
CACGGGCGAGCACCTCCACTTCTTCCCGAACTACTGGGGTCCGACCGGCGTGAACAGCGACGTTTCGGATCGAG  
GTCGAGAAGGTGGAAGAGGGGGCAGCGTTCGCTCGACGCCGTTTGGTTCGGAGAGTCGGCGACGGAGTTGGAGT  
CGCCCGATTCGGGCTCGAAATCGCGCGGCGCGTTCGGGTTCGCGTCTCGGACCTGCTCGGAGGTGACGACTAA  
>hmu:Hmuk\_2470-Ar DMSO reductase family type II enzyme, molybdopterin  
subunit; K00370 nitrate reductase 1, alpha subunit [EC:1.7.99.4] (N)  
ATGAGTGAACACGACATCGACGACGACCGGTGGATGGACAGTTCGGGAATTACCCGACGCGACTTCGTCCGCG  
GCCTCGGGGCCGCCTCGATCGTCCGGCGGACCGGCCTGTCGTTCCGCCGACGAAGAGATGGACGGGCTGCAGGC  
GGTCGACGATCCGATCGGATCGTACCCCTACCGCGAGTGGGAGGACCTTACCGCGAGGAGTGGGACTGGGAC  
TCGCTGGCGCGGTTCGACCCACAGCGTCAACTGCACCGGCTCCTGTTTCGTGGAACGTCTACGTCAAGGACGGGC  
AGGTCTGGCGCGAGGAACAGGCGGCGACTACCCCGTATCGACGAGGACCTCCCAGATCCCAACCCGCGGGG  
CTGCCAGAAAGGGGCTGCTACACGGACTACGTCAACGCCGACCAGCGCGTGTCCACCCGCTGCGCCGCACC  
GGGAACCGCGGCGAGGGCCAGTGGGAGCGCATCTCCTGGGACGAGGCACTGACGGAGATCGCCGACCACGTCA  
TCGACGAGGTGCAGGCGGGCCGTTACGACGCAATCTCGGGCTTTACGCCGATCCCGGCCATGTGCCCCGTGTC  
GTTCCGCCAGCGGCTCCCGGCTCGTGAACCTGCTGGGCGGCGTGTCCACAGCTTCTACGACTGGTACTCCGAC  
CTGCCGCCGGGTTCAGCCGATCACCTGGGGGACCCAGACGGACAACGCCGAGTCCGCCGACTGGCACAACGCCG  
ACTACATCATCGCCTGGGGGTGCAACATCAACGTCACCCGTATCCCCGACGCCAAGTACTTCTTCGACGCCGG  
CTACGAGGGAGCGAAACCGGTCGGGATCTTACCAGACTACTCCAGACCGCGATCCACACCGACGAGTGGCTC  
GCGCCGAGGGTGGCACCACCGCGCTCGCGCTCGGGATGGCCAGACGATCGTTCGACGAGGAGCTGTACG  
ACGAGTCCCACCTCAAAGAGCAGACCGACATGCCGCTGCTCGTGCAGAAAGACACCGGGAAGTTCTCCGGGC  
GGGCGAGGTTCGGTCTCGCGGCGGACCGCGACACCCGGACAAGGTGTTTCGTGATGGTTCGACGAGGACGGGGAG  
CTCCGGCCCCGCGCCCGTTCGCTCGGCGAGCGCGACGGCCAGCACGACCCCGAGTCGAGCATCGAACTCGACT  
TCGACCCCGAGCTGGGCGTTCGAGCGGAGCGTTCGAGACCGACGCGGCGAGGTGGCGGTCCGGTTCGGTCTGGGA  
GAACCTCCGTGAGGAACTGTCACAGTACACGCCCGGTTCGTTCCACGAGGAGACCGGGGTTCGGCGAGAACC  
TACCAGCGCGTCCCGGAGAGTTCGCCGACGCCGACCGGCCAAGATCATCCACGGCAAGGGCGTCAACGACT

GGTACCACAACGACCTGGGGAACCGGGCGATCCAGTTGCTCGTGACCCTGACCGGGAACCTCGGGCAACCCGG  
CACCGGGCTGGATCACTACGTGCGCCAGGAGAAGATCTGGACGTTCCACGGCTGGAAGACGCTCTCGTTCCCG  
ACCGGCAGCGTGCAGGGCGTGCCGACGACGCTGTGGACCTACTTCCACGCCGGCATCCTCGACAACACCGATC  
CCGACACCGCCGAGAAGATCCGCGAGTCCATCGACGAGGGCTGGATGCCGGTGTACCCCGAGGAGCGCGAGGA  
CGGGTCTGCGCCGACCCCTCGACGATGTTCTGTCTGGCGTGGCAACTACTTCAACCAGGCCAAGGGCAACGTC  
GCCGTCGAGGAACAGCTCTGGCCGAACTGGATCTGGTCTGGACATCAACTTCCGGATGGACTCGACGGCGA  
TGTACTCCGACATCGTCTCCCGCGGCGAGCCACTACGAGAAGCACGACCTGAACATGACCGACATGCACAC  
GTACGTCCACCCGTTACGCCCGCCGTCGAGCCGCTGGGCGAGGCCAAGTCTGACTGGGAGATCTTCCGCCTG  
CTGGCCGAGAAGATCCAGGAGCGGGCCAGGAACGGGGGTCGAACCGGTTCGAGGACCGATCGTTTCGACCGCG  
AGATCGACCTGACGACGATCTACGACGACTACGTGCGCGACTGGGAGACCGGCGAGGAGGGAGCCCTCGAAGA  
CGGCCGCGAGGCCTCCGAGTTCGTCTCGAACACAGCGAGGAGTCCAACCCCGACACGCGACGAGCAGATC  
ACGTTCCGCCGACACCGTCGAGCAGCCCCAGCGTCTCGAAGCGGCGGGGATCACTGGACCTCCGACATCGAGG  
ACGGAGCACCGTACGTCCCCTGGCAGGACTACGTCCAGGACAAACAGCCCTGGCCACCTTCACCGGCCGCCA  
GCAGTACTACGTGACCCACGACTGGTTCCCTCGAACTCGGCGAGGAGTTGCCACGCACAAGGAGGGGCCACAG  
GACACCGGCGGGGACTACCCCTCTCCTACAACACGCCCCACAGCCGCTGGTTCGATCCACTCGACGTGGCGCG  
AGAACACGAAGATGCTCCGGTCCAGCGGGGCGAACCGACGGTCTTCTCAATCCCGAGGACGCCGAGGAGCG  
CGGGATCGAGGACGGCGACACCGTCGAGGTGTACAACGACATGGGCAGCGTCGAGGTACAGGCGAAGATCTAC  
CCGTCGGGTGACCCCGGAACGGTCCGGCACTTCTTCTCGTGGGAGAAGTTCCAGTATCCGGGCCGAGACA  
TCAACACGCTCGTCCCGATGTACATGAAGCCCACGACGCTGGTCCAGTACCCCGAGGACACCGGCGAACACCT  
CTACTTCTTCCCGAACTACTGGGGTCCGACCGGCGTCAACAGCGACGTGAACGTGGACGTCCGACTGACCGAC  
GGCAGTCGGGCTCGGGAGACGAGCAGCGCGAGTCTGTGCGTGTGCGCCCCGAGGAGGTGACGACCAATGA  
>hut:Huta\_0024-Ar DMSO reductase family type II enzyme, molybdopterin  
subunit; K00370 nitrate reductase 1, alpha subunit [EC:1.7.99.4] (N)  
ATGAGTGATCCAACCCAATCCGACGACAGTACAGACGGCGTCTCACGTGCGGACTTCTGCTGGGTGCCGGCG  
CGGCCGGCGTGGTTCGGCGGACCGGCTGACCGTCGCCGATCGCGCCCTCGACGGGCTCGAAACCGTCGACGA  
TCCGATCGGCAATTATCCCTACCGCGACTGGGAGGACTTCTACCGTGAGGAGTGGGACTGGGATTCGGTTCGCC  
CGGTTCGACGCACTCGGTCAACTGCACCGGCTCCTGTTTCGTGGGACGTCTACGTCAAGAACGGCCAGGTCTGGC  
GCGAACAAACAGGCCAACGACTACCCGACCTTCGACGAGAGTCTCCCGATCCCAACCCCGGGGCTGCCAGAA  
GGGGCCCTGTTACAACGACTACGTGACGCCGAACAGCGTGTCCAGTACCCGATGCGTCGCACCGGCGAGCGC  
GGGGCCGGCGAGTGGGAGCGCATCTCCTGGGACGAGGCGCTGACCGAGATCGCCGAGCACGTCATCGAGGAGA  
TCCAGAACCGCCGCTACGACGCGATTTCCGGGTTACGCCGATCCCGCGATGAGTCCCGTGAGCTTCGCCTC  
GGGACGCGGCTGGTCAACCTGCTCGGCGGCGTCTCTCACTCCTTCTACGACTGGTATTCGGACCTCCCGCCG  
GGCCAGCCGATCACCTGGGGCCATCAGACCGACAACGCCGAGAGCGCCGACTGGCACAACGCCGAGTACATCA  
TCGCGTGGGGGTCAAACATCAACGTCACGCGCATCCCCGACGCGAAGTACTTCTTCGACGCGGGGCTACGAGGG  
CGCAAAGCGGGTTCGGCGTCTTCTCCGATTACTCCAGACCGCCATCCACACCGACGAGTGGATCGCGCCTGAT  
CCCGGTACCGACACCGCGCTGGCGCTTGGGATGGCCCGCACCATCGTTCGAGGAGGAGCTCTACGACGAGGCAC  
ACCTCAAGGAACAGTCCGACATGCCACTGCTCGTTTCGGAACGATACGGGCAAGTTCTTCCGGGCGAGCGAGGT  
CCCCGGCCTCTCGGTTGCAGCCGACGAACCCGAGAAGGTTCATGGTTCATGCAGGACGGGGAGGGCAACCTGCGT  
GCTGCGCCGGGGTTCGCTCGGTGAACGCGAGGCCAAGTACGACGACTCCTTGTTCGATCGAACTCGATTTTCGACC  
CGAACTGGCCGTCGAGGACACCGTCGGGACGACCGACGGCGAGGTGGCCGTCACGTTCGGTCTGGAACAACCT  
CCGGGAGGAACTGGCCAACCTACGCCCCGAGTACGTTCGCCGACGAGACCGGCGTTCGGGAAGGAGACTCACCAG  
AAGATCGCCCGGGAGTTCGCCGACGTCGACCGCGGGAAGATCATCCACGGCAAGGGCGTCAACGACTGGTATC  
ACAACGACCTGGGCAACCGTTCGATCCAGTTGCTCGTTCAGTTGACGGGCCACATCGGGCGGAACGGCACCGG  
CGTCGACCACTACGTTCGGCCAGGAGAAGATCTGGACGTTCAACGGCTGGAAGACCCCTCTCGTTCCCGACCGGT  
TCCGTCCGGGGCGTCCCGACGACGTTGTGGACCTACTACCACGCGGGCATCCTGGAGAACACCGACGCGGAGA  
CCCGCCGGAAGATCGAGGAGGCGTTCGAGAAGGACTGGATGCCCGTCTACCCCGAGGAGCGCGGGGACGGCAC  
CCGACCCGATCCCTCGACGATGTTCTGTCTGGCGGGGCAACTTCTTCAACCAGGCGAAGGGCAACGTCGCGGTC  
GAGGAGGTCTCTGGGACAACTCGACCTCGTTCGTTGGACATCAACTTCCGGCTGGACTCGACAGCGCTGTACG  
CCGACATCGTCTGCGGCGCGGAGCCACTACGAGAAAACGACCTCAACATGACGGACATGCACACCTACGT  
GCATCCGTTTACGCCCGGGTTCGAACCGCTGGGTGAGTCCAAGTCCGACTGGCAGATCTTCCGGGAACTCGCG  
GCGAAGATCCAGGAAATCGCCCGGATCGGGACATCGACCCGATCGACGACCGGAAGTTCGACCGCCAGATCG  
ACCTCCAGTTCGGTCCACGACGACTACGTCCGGGACTGGGTGAGCGACGAAGACGGTGCCCTGGAAGAGGACCG  
GGCGGCTGCGAGGCCATCCTCGAACACTCCACGGAGACCAATCCGGACGACGGCGGCGAGATCACCTTCGCC  
GACACCGTTCGACAGCCCCAGCGCTTCGAGGCGCGGGCGACCACTGGACCTCCGACATCGAGGACGGCACGG



CCTACGCGCCCTGGAAGGACTTCGTCCAGGACAAGGAGCCCTGGCCAACCCTGACGGGTGCGCCAGCAGTACTA  
CATCGATCACGACTGGTTCCTCGATGTCGACGAGCAACTCCCGACGCACAAGCGCCCGGTGCGAGACCAACGAT  
CAGAGCGAGTACCCCTGCGGTACAACACGCCCCACGGTCGGTGGTTCGATCCACTCGACGTGGCGCGACAGCG  
AAAAAATGTTGCAGTTGAACCGGGGTGAGCCGGTGGTCTTCATTCACCCCGAGGACGCAAAGCACCGCGGGAT  
CGAGGACGGCGACACGGTCGAGATCTACAACGACCTGGCGACGATCGAGGCCAACGCCAAGCTCTACCCGGCC  
AGCGAACCCGGGACCGTCCGGCATTACTTCGCCTGGGAGCGCTACCAGTACCCAGCCGGAACAACCTTCAACT  
CGCTGATCCCGATGTACATGAAACCCACCCAGCTCGTCCAGTACCCCGAAGACTCGGGCGAGCACCTCCATTT  
CTCCCGAACTTCTGGGGCCCCACCGGGTCAACAGCGACGTCCGCTGTGATATTAGGCCGAAAGAAGGGGT  
GACGACTGA

>mac\_MA1205-Ar

TTGACAAGAAAAATTGCTTTTTACGGGAAAGGTGGTATTGGAAAATCCACCACTCAACAAAATACTGCAGCGG  
CTATGGCATATTATCATGGCAAAAATGTTTTATCCACGGGTGTGATCCCAAAGCAGACTGTACTCGTTTTGGC  
CCTTGGAGGCGTACCCAGACCACAATAATGGATACGCTCAGGGAAGTGGGAGAAGAAGCCGTAACAGTTGAT  
AATGTAGTTAACACCGGTTTCAAAGGAATCAGATGTGTTGAATCCGGAGGTCCGGAACCGGGTGTGGGTGTG  
CTGGCAGGGGTGTAATCACTGCTATTAACCTTATGGAGGAGTTGGGAGCCTATTCCGATGACCTGGATTTTGT  
TCACTTTGACGTGCTTGGCGACGTTGTCTGCGGCGGATTTGCAATGCCAATTCGGGAGGGTAAAGCTCAGGAA  
GTATACATAGTCGCTTCGGGAGAAATGATGGCGACTTATGCAGCAAATAATATCTGCAAAGGTCTGCTGAAGT  
ATGCAGAACAGAGCGGGGTGAGATTGGGTGGAATCATTGTAACAGCCGTAAGGTGCGATAATGAGCTGGAAAT  
GATGGAGGAGTTTGTTCGCGCTTGGAACACAGCTGATACACTTTGTGCCAAGAGATAACATTGTTCAAAG  
GCGGAGTTTAATAAAAAGACAGTTGTGGAGTTCGACCCGGAATGCAACCAGGCAAAAAGAATACGGAAAACCTG  
CCAAGAAAATTCTTGAGAATGATATGTTTCGTGATCCCCAAACCGTTAAGTATGGATCAACTGGAGAAAATGGT  
GGCAAGATACGGTCTTATGGATTAA

>mac\_MA1213-Ar

ATGACCAGAAAAATTGCTTTTTACGGGAAAGGTGGTATTGGAAAATCCACCACTCAACAAAATACTGCTGCAG  
CTATGGCATATTATCATGGCAAAAATGTTTTATCCACGGGTGTGATCCCAAAGCAGACTGTACTCGTCTGGC  
ACTCGGGGGCGTACCCAGACCACAATAATGGATACGCTCAGAGAGCTGGGTGAGGAGGCCGTAACAGTTGAT  
AATGTAGTTAACACCGGTTTCAAAGGAATCAGATGTGTTGAATCCGGAGGTCCGGAACCGGGTGTGGGTGTG  
CTGGCAGGGGTGTAATCACCGCTATTAACCTCATGGAGGAGCTGGGAGCCTATTCCGATGACCTGGATTTTGT  
TCACTTTGATGTGCTTGGCGATGTTGTCTGCGGCGGATTTGCAATGCCAATTCGGGAGGGTAAAGCTCAGGAA  
GTATACATAGTCGCTTCGGGAGAAATGATGGCGACTTATGCAGCAAATAATATCTGCAAAGGTCTACTGAAGT  
ATGCAGAACAGAGCGGGGTGAGATTGGGTGGAATCATTGTAACAGCCGTAAGGTGCGATAATGAGCTGGAAAT  
GATGGAGGAGTTTGTTCGCGCTTGGAACACAGCTGATACACTTTGTGCCAAGAGATAACATTGTTCAAAG  
GCGGAGTTTAATAAAAAGACAGTTGTGGAGTTCGACCCGGAATGCAACCAGGCAAAAAGAATACGGAAAACCTG  
CCAAGAAAATTCTTGAGAATGATATGTTTCGTGATCCCCAAACCGTTAAGTATGGATCAACTGGAGAAAATGGT  
GGCAAGATACGGTCTTATGGATTAA

>mba\_Mbar\_A2281-Ar

ATGACAAGAAAAATTGCTTTCATGGAAAAGGTGGAATCGGAAAGTCCACCACGCAACAAAATACTGCAGCTG  
CTATGGCATATTATCATGGCAAAAAATTTTCATTCACGGCTGTGACCCAAAAGCTGACTGTACTCGTCTTGT  
GCTTGGTGGAGTAGCTCAAACCTACGATAATGGATACTTTAAGGGAGCTTGGTGAGGAGGCTGTTACAGCTGAA  
AATGTCATCAATACCGGCTTTGATGATATAAAATGCGTTGAGTCCGGTGGTCCAGAGCCCGGTGTTGGCTGTG  
CTGGCCGAGGAGTTATCACTGCAATTAATCTCATGGAGGAAATGGGAGCCTATTCCGAGGACCTGGATTTTAT  
TCACTTTGATGATTTGGGCGATGTTGTCTGCGGTGGTTTTGCAATGCCTATTCCGGGAAGGAAAAGCCCAGGAA  
GTATACATCGTTGCTTCTGGAGAAATGATGGCGACTTATGCAGCAAATAACATCTGTAAGGGCCTGTTGAAGT  
ATGCCGAACAAAGCGGAGTGAGATTGGGAGGAATAATTTGCAACAGTCGTAGGGTGGATAATGAACTGGAAAT  
GATGGAGGAATTTGCTTCTGCACTGGGAACGCAGCTGTTATACTTTGTACCACGTGACAACATTGTCCAAAA  
GCAGAGTTCAATAAAAAGACTGTAGTGGAGTACGACCTACATGCAATCAAGCACTTGAATACAAAGAAGCTCG  
CCAAAAAATCCTAGAAAATGACATGTTTGTATCCCTAAACCATTAAGTATGGATCAGCTAGAGAAAATGGT  
TGAAAGATATGGTCTTATGGATTAA

>mae\_Maeo\_1434-Ar

ATGAGTTTCGACGAAATGCTCCGGAAGCAAAAAAATAGCAATATATGGAAAAGGAGGTATTGGAAAATCAA  
CCACTACACAAAATATGGCAGCAGCTCTTGCTCACTTTTAGGCCATAAAGTAATGATACACGGATGTGACCC  
AAAAGCAGATTCACAAGAATGATTCTCCACGGAATGGGGCAAAATACAGTAATGGATGTATTGAGGGATGAA

GGGAAGATGCAATTACACTTGAAAAAGTTAGAAAACAAGGATTTGGAGGTATCTACTGTGTTGAGAGTGGAG  
GTCCTGAGCCAGGAGTAGGATGTGCTGGTAGAGGAGTTATTACAGCTGTTGATAACAATGAGAGAATTAGAAGG  
ATATCCAGATGATTTGGATAATTTATTCTTCGATGTTCTTGGGGATGTTGTATGTGGTGGTTTCGCAATGCCA  
CTTAGAGATGGATTAGCAGAAAGAAATATATATCGTTACATCAGGGGAAATGATGGCATTATATGCTGCAAACA  
ATATTGCAAAAGGTATTTTAAAGTATGCCGACCAGTCAGGAGTTAGATTAGGGGGAATTATCTGTAATTCAG  
AAAAGTAGATGGAGAAAAAGAATTAATGGAAGAATTTGTTGAAAAATTAGGAACAAAAATTAATCCACTTTGTC  
CCAAGAGACAATATCGTTCAGAAAGCAGAATTTAACAAACAAACAGTAATCGAATATGACCCAGAATGTAATC  
AAGCAAAAGAATACAGAACCTTGGTCGAAAATATTACGGCAAATGAAGATTTAGTAAAACCTACGCCATTGTC  
AATGGAGGAATTAGAGCAGTTAGTGGAAAAATACGGATTATTAGATTAA

>mok\_Metok\_1120-Ar

ATGAGTTTTGACGAAATAGCTCCAGATGCAAAAAAATAGCAATTTATGGAAAAGGAGGTATAGGGAAATCGA  
CAACAACGCAAAATACTGCCGCAGCTATGGCATATTACTTCAATAAAAAAGTGATGATTCATGGATGTGACCC  
AAAAGCAGATTTCAACTAGAATGATTCTTCATGGAAAACCCCAAAAAACCATCATGGATGTTCTTAGAGAAGAG  
GGAGAAGAAGGAGTAACTCTTGGAAAGGTAAGAAAAGCAGGATTTAAAGATATATTATGTGTAGAAAAGTGGTG  
GTCCAGAACCTGGTGTAGGATGTGCAGGAAGAGGGGTTATTACTGCTGTGGATATGATGAGGGAGCTCGAAGG  
ATATCCAGATGATTTAGATAATCTATTCTTTGATGTCTTGGGGATGTTGTGTGTGGTGGATTTGCCATGCCA  
CTTAGAGATGGTCTTGCACAGGAGGTATACATCGTTACATCGGGAGAGATGATGGCATTGTATGCTGCAAACA  
ACATTGCAAAAGGTATATTTAAAATATGCTGAACAGTCAGGCGTAAGATTGGGTGGGATTTATCTGTAATTCAG  
AAATGTGGATGGAGAAAAAGAATTGATAGATGAATTTGTTGATAAATTGGGAACAAAAATTAGTACATTTCTGTT  
CCAAGAGACAATATTGTCCAAAAGGCTGAATTCATAAAAAAGCCGTTGTAGAATTTGACCCAGAATGCAATC  
AAGCTAATGAATATAAAACACTTGCCAAAACATTAATGAAAATGACGAACCTGTAATACCTACGCCATTAAC  
AATGGATGAATTGGAAGGATTAGTATTTAAAATATGGATTACTTGATTAA

>mfs\_MFS40622\_0031-Ar

ATGAGTGTTTATGATGAAATTGCACCAAATGCAAAAAAGGTTGCTATTTACGAAAAGGAGGTATTGGTAAAT  
CTACAACCACACAGAACACTGCTGCTGCATTAGCATACTATTACAAATTAAGGGTATGATTCACGGATGTGA  
CCCAAAGGCAGATTCAACAAGAATGATTTTACATGGAAAGCCGCAAGAGACCGTTATGGATGTTTTGAGAGAG  
GAAGGAGAGGAGGGAGTTACCTTAGAAAAAATTAGGAAAGTTGGATTTGGAGGAATCTTGTGTGTTGAGTCAG  
GAGTCTGAGCCAGGAGTTGGATGTGCTGGAAGAGGGGTTATTACAGCAGTTAATTTGATGATTGAACCTGG  
AGGATACCCAGATGACTTAGACTTCTTGTCTTTGACGTCCTTGGGGACGTTGTCTGTGGAGGATTTGCAATG  
CCATTGAGAGATGGATTGGCAAAAGAGATTTACATTGTCTCTTCAGGAGAAATGATGGCTCTCTATGCAGCTA  
ACAACATTGCAAGAGGTATCTTGAAGTATGCTGAACAGTCAGGGGTTAGATTAGGAGGAATTTATTTGTAACCTC  
AAGAAAAGTCGATGGAGAAAAAGAATTGATGGAAGAGTTCTGCGATTTGTTGGGAACCTAAGTTAATACACTTC  
ATTCGAAGAGACAACATAGTCCAAAAGCAGAGTTTAAACAAGATGACTGTTGTTGAATTCGCTCCAGACCATC  
CACAGGCACATGAATACAAGAAGTTAGGTAAGAAGATTATGGACAACGATGAATTTGGTTATTTCCAACACCATT  
GTCAATGGACCAATTAGAAAAGTTAGTTCGAGAAATATGGATTACTTGATAAATAA

>mvu\_Metvu\_1081-Ar

ATGAGTGTTTATGATGAGATTGCTCCAAATGCAAAAGAAAGTTGCTATTTATGGAAAAGGAGGAATTGGTAAAT  
CAACCACAACCTCAAAATACTGCTGCTGCGTTGGCATACTACTACAATTTAAAAGGAATGATCCACGGATGTGA  
TCCAAAAGCCGATTCAACGAGAATGATTTTACACGGTAAACCACAAGAGACGGTTATGGATGTGTTAAGGGAA  
GAAGGGGAGGAAGGAGTTACGTTGGAAAAAGTCAGAAAAGTTGGATTTGGAGGAATTTTATGCGTAGAAAGTG  
GAGGGCCTGAGCCAGGAGTTGGCTGTGCTGGAAGAGGAGTTATAACCGCAGTTAATATGATGATCGAACCTGG  
AGGGTATCCTGATGATTTGGATTTTCTGTTCTTTGATGTATTGGGGGATGTTGTATGTGGAGGATTCGCAATG  
CCACTAAGAGATGGGCTGGCAAAAGAGATCTATATTGTCTCTTCGGGAGAGATGATGGCTCTCTATGCAGCTA  
ACAACATTGCGAGAGGTATCTTAAAATATGCTGAGCAATCAGGTGTTAGGTTGGGAGGAATTTATCTGTAATTC  
AAGAAAAGTTGATGGAGAAAAAGAGTTGATGGAAGAGTTTTCGCAAATGCTGGGAACCAAGTTAATACACTTT  
ATTCAGAGACAATATTGTCCAAAAGCTGAGTTTAAATAAGATGACAGTTGTTGAATTCGCTCCAGATCATC  
CCCAAGCACATGAATACAAAAAATTGGGGAAAAAATTTATGGATAATGATGAACTGGTGGTTCCAACCTCCACT  
TTCAATGGATCAACTGGAAAACTCGTTGAAAAGTATGGATTGCTTGATTAA

>mig\_Metig\_1736-Ar

ATGAGTTTTGATGAAATTGCTCCAAACGCAAAAAAGTGGCTATCTACGAAAAGGAGGTATTGGTAAATCTA  
CAACCACACAAAATACTGCTGCAGCATTGGCATACTATTACAATTTAAAAGGTATGATTCATGGATGTGACCC  
AAAAGCAGACTCAACAAGAATGATATTACACGGAAAACCAAGAACCCTCATGGATGTTCTTAGAGAAGAA  
GGAGAGGAAGGAGTTACATTAGAAAAGTTAGAAAAGTTGGATTTGCAGGAATCTATTGTGTTGAGTCAGGAG  
GTCTGAGCCAGGAGTTGGATGCGCTGGAAGGGGAGTTATTACGGCAGTTAACTTAATGAGAGAACTCGGAGG

ATATCCAGATGATTTAGACTTCCTCTTCTTTGATGTCTTGGGGACGTTGTCTGTGGTGGATTCGCAATGCCA  
TTGAGAGATGGACTTGCTAAGGAAATCTATATCGTCTCATCTGGAGAGATGATGGCATTATATGCAGCAAACA  
ACATTGCAAAAAGGTATCTTAAAATATGCAGAACAATCTGGGGTTAGATTAGGAGGAATTATCTGTAACCTCAAG  
AAAGGTCGATGGAGAATTAGAATTGATGGAAGAATTCTGTGACAAATTAGGAACAAAATTAATCCACTTCATT  
CCAAGAGACAACATTGTCCAAAAGCAGAGTTCAACAAGATGACTGTTGTTGAATTCGCTCCAGATAGCAACC  
AAGCAAAAGAATACAAAAAATTTGGGTAAAAAATCATGGATAACGATGAACTCGTAATTCACACCAATGAC  
AATGGATGAAATGGAAAAATTAGTCGAAAAATACGGATTATATGACAAATAA

>mif\_Metin\_0041-Ar

ATGAGCTTTGACGAAATTGCCCAAATGCTAAGAAAGTAGCAATTTACGGAAAAGGAGGGATAGGGAAGAGTA  
CAACTACACAAAATACAGCAGCAGCTTTAGCATACTACTACAAATTAAGGGAATGATTCACGGCTGTGATCC  
TAAGGCGGATTCACAAGAATGATATTACATGGAAAGCCCCAAGAGACAGTTATGGATGTTTTGAGAGAAGAA  
GGAGAAGAAGGAGTTACCTTAGAAAAGGTTAGAAAAGTAGGATTCTGTGGAATTTATTTGTTGAAATCTGGAG  
GACCAGAGCCAGGGGTTGGATGTGCAGGAAGAGGGGTTATAACTGCTGTCAATCTAATGAAAGAGCTTGGTGG  
ATATCCAGATGATTTAGACTTCTCTTCTTTGACGTCTTGGGGATGTTGTCTGTGGAGTTTTGCCATGCCT  
CTAAGGGATGGGTTGGCTAAGGAAATTTACATAGTTTCTCTGGAGAAATGATGGCACTTTACGCAGCTAACA  
ACATTGCTAAGGGTATCTTAAAATATGCTGAGCAGTCAGGAGTTAGATTAGGAGGAATAATTTGTAACCTCAAG  
AAATGTTGATGGAGAAAAGAGAGTTAATGGAAGAGTTCTGTGATAAGTTAGGAACCTAAGCTTATTCACTTCATT  
CCAAGAGACAATATAGTTCAGAAGGCTGAGTTAACAAGATGACAGTAGTTGAATTTGCTCCAGATCATCCAC  
AGGCTTTAGAGTACAAGAAGTTAGGAAAGAAGATTATGGACAATGATGAACTTGTAATTCACACTCCATTAAG  
CATGGATGAGTTGGAGAAGTTGGTTGAGAAGTATGGGTTATATGACAAATAA

>mel\_Metbo\_1819-Ar

ATGGTAAGAAAAATTCGATTTATGGAAAAGGTGGAATTTGGAAAATCTACAACACTCAGAACACAGCATCAG  
CCATGGCTCATTTCCATGGAAAAAAGTTATGATTCACGGATGCGACCCTAAAGCAGACAGTACAAGAATGAT  
ACTTAGGGGTAAAATGCAAACCACCATGATGGACACACTTAGGGAAGAAGGCGAAGAAGCATGCATGAACCTG  
GACAATGTTATGTCAACAGGTTTTGAAGGAATAAAAATGTGTTGAATCTGGAGGTCCAGAACCAGGTGTAGGAT  
GTGCTGGTTCGTGGTGAATAACAGCTATCACACTCATGGAACAACCTCAAAGTCTACGATGACAACGACTTTGT  
TTTCTTCGATGTTTTAGGTGACGTTGTTTGTGGAGGTTTTGCAATGCCAATCAGGGATGGTAAAGCCGAAGAA  
ATATACGTTGTAGCATCTGGAGAAATGATGGCACTTTACGCAGCAAACAACCTGTGTAAAGGTATGGTAAAAT  
ATGCTAATCAGAGTGGAGTGGAGCTTGGAGGAATCATCTGTAACAGCCGTAACGTGGACGGTGAAAAGGAACT  
ACTGGAAGAATTCTGTAAAAAATTTGAACTCAACTTATCTACTTCGTACCTAGGGACAACATGGTGCAAAAAG  
GCAGAGTTCAACAAAAAAACAGTTGTTGACTTCGATGCTGAATGTAACCAAGCACACGAATACGAAGCATTGG  
CTGGAAAAATTATCAACAATGAAAACCTTCGTGATTCCAAAACCAATGTCCATGGACGAACTGGAAGAAATGGT  
ACTACAGTACGGTTTTAACTGACTAA

>mew\_MSAN\_2014-Ar

ATGGTAAGAAAAATAGCAATTTATGGAAAAGGTGGAATTAGGAAAATCAACAACACTCAAAACACAGCATCAG  
CAATGGCACATTTCCATGATAAAAAAGTCATGATACACGGCTGCGATCCAAAAGCAGACAGTACAAGAATGAT  
ACTTGGGGGAAAAATGCAGAGAACCATGATGGACACCTTGAGAGAAGATGGAGAAGAAGCCTGTATGGTACTG  
GATAACATCATGTCAATAGGTTACGAAGGAATAAAAATGTGTAGAATCCGGTGGTCTGAACCTGGTGTAGGAT  
GTGCTGGTAGGGGTGTGATAACAGCAATTACTCTCATGGAACAGCAGAAAGTCTACGAAGATAACGATTTTGT  
TTTCTTTGATGTACTTGGAGATGTTGTGTGCGGTGGATTTGCAATGCCTATCAGGGACGGTAAAGCTGAAGAA  
ATCTACGTTGTGGCTTCAGGAGAGATGATGGCACTCTACGCAGCAAACAACCTGTGTAAAGGTATGGTGAAT  
ACGCTAACAGAGTGGTGTGAGACTTGGAGGAATAATCTGTAACAGTCGAAACGTTGATGGAGAAAGAGA  
CCTTGAAGAATTCTGTAAAAAATAGGAACCCAAATGATCCATTTTCGTTCCAAGGGACAACATAGTCCAGAAA  
GCAGAGTTCAACAAAAAAACCGTGGTAGACTTTGAACCAGACTGTAACAGGCCCATGAATACGAAGCACTTG  
CAGGTAATAATCAACAACGAAAATTTTCGTGATTCCAAAACCAATGTCCATGGATGAGCTTGAAGAGATGGT  
TGTTACAGTACGGTTTTAAATGGACTAG

>mmp\_MMP0853-Ar

ATGGTAAGAAAAATCGCAATTTACGGAAAAGGTGGAATTTGGAAAATCAACCACCACACAAAACACAGTAGCTG  
CAATGGCTCACTTTACAGCAGAAAAAGTATTCATTACGGATGTGACCCAAAAGCAGACAGTACAAGGTTAAT  
CTTGCACGGTAAACAGCAAGTAACAATGATGGATACATTAAGAGAAAAAGGGGAAGACGAATGTACTCCTGAC  
AAAGTTATCGAAGTTGGTTTCGGTGGCGTAAAAATGTGTAGAATCAGGAGGACCTGAGCCAGGAGTAGGCTGTG  
CAGGTAGAGGTGTTATCACTGCAATTACACTCATGGAACAGCACGGTGTTTACGAAGACGACCTTGACTTTGT  
ATTCTTCGATGTTTTAGGGGACGTTGTATGTGGTGGATTCGCAATGCCTGTAAGAGACGGTAAAGCAGACGAA  
ATCTACGTTGTAGCATCTGGAGAAATGATGGCTCTTACGCTGCAACAACATCTGTAAAGGAATGGTTAAAT

ACGCAGAACAAAGCGGTGTAAGACTTGGAGGAATCATCTGTAACAGTAGAAACGTAGATGGTGAGCTTGACTT  
ATTACAAGAATTCTGTGACAAAATTGGAACACAATTAATCCACTTTGTTCCAAGAGACAACATCGTTCAAAAA  
GCAGAATTCCAGAAAAAAGCTGTTGTTGACTACGACGATACATGCAACCAAGCACTGGAATACAAAGAACTCG  
CAAGAAAAATCATTGAAAACGAAAACCTCGTAATTTCCAACCCCAATGACAATGGACGAATTAGAAGAATTAAC  
TTCAAAATACGGATTCTTAGATTAA

>mmx\_MmarC6\_1803-Ar

ATGGTAAGAAAAATCGCAATTTACGGAAAAGGTGGAATCGGAAAATCAACCACCACACAAAACACAGTAGCTG  
CAATGGCTCACTTTACGACAAAAAAGTATTTCATTACGGATGTGACCCTAAAGCAGACAGTACAAGGTTAAT  
CTTGCACGGTAAACAGCAAGTAACAATGATGGATACATTAAGAGAAAAAGGAGAAGACGAATGTACTCCTGAC  
AAAGTTATCGAAGTTGGTTTCGGTGGCGTAAAATGTGTAGAATCAGGAGGACCTGAGCCAGGAGTAGGCTGTG  
CAGGTAGAGGTGTTATCACTGCAATTACACTCATGGAACAACACGGTGTTCGAAAGACAACCTTGACTTTGT  
ATTCTTCGATGTTTTAGGGGACGTTGTATGTGGTGGATTTCGCAATGCCTGTAAGGGATGGTAAAGCAGACGAA  
ATCTACGTTGTAGCATCAGGAGAAATGATGGCTCTTACGCTGCAACAACATCTGTAAAGGAATGGTTAAAT  
ATGCAGAACAAAGCGGTGTAAGACTTGGAGGAATCATCTGTAACAGTAGAAACGTAGATGGTGAGCTTGAGTT  
ATTACAAGAATTCTGTGACAAAATTGGAACACAATTAATCCACTTCGTTCCAAGAGACAACATCGTTCAAAAA  
GCGGAATTCCAGAAAAAAGCTGTTGTTGACTTCGACGACACATGCAACCAAGCAATGGAATACAAAGAACTCG  
CAAGAAAAATCATTGAAAACGAAAACCTCGTAATTTCCAACCCCAATGACAATGGACGAATTAGAAGAATTAAC  
TTCAAAATACGGTTTCTTAGATTAA

>mmq\_MmarC5\_0658-Ar

ATGGTAAGAAAAATCGCAATTTACGGAAAAGGTGGAATCGGAAAATCAACCACCACACAAAACACAGTAGCTG  
CAATGGCTCACTTTACGACAAAAAAGTATTTCATTACGGATGTGACCCTAAAGCAGACAGTACAAGGTTAAT  
CTTGCACGGTAAACAGCAAGTAACAATGATGGATACATTAAGAGAAAAAGGAGAAGACGAATGTACGCCTGAC  
AAAGTTATCGAAGTTGGTTTCGGTGGTGTAAAATGTGTAGAATCAGGTGGGCCAGAGCCTGGAGTAGGCTGTG  
CAGGTAGAGGTGTTATCACTGCAATTACACTCATGGAACAACACGGTGTTCGAAAGACGACCTTGACTTCGT  
ATTCTTCGATGTTTTGGGGGACGTTGTATGTGGTGGATTTCGCAATGCCTGTAAGAGATGGTAAAGCAGACGAA  
ATCTACGTTGTAGCATCAGGGGAAATGATGGCTCTTACGCTGCAACAACATCTGTAAAGGAATGGTTAAAT  
ACGCAGAACAAAGCGGTGTAAGACTTGGAGGAATATCTGTAACAGTAGAAATGTAGATGGTGAGCTTGACTT  
ATTACAAGAATTCTGTGACAAAATTGGAACACAATTAATCCACTTCGTTCCAAGAGACAACATCGTTCAAAAA  
GCAGAGTTCCAGAAAAAAGCTGTTGTTGACTTACGACGACACATGTAACCAAGCAATGGAATACAAAGAACTTG  
CAAGAAAAATCATTGAAAACGAAAACCTCGTAATTTCCAACCCCAATGACAATGGACGAATTAGAAGAATTAAC  
CTCAAAATACGGATTCTTAGATTAA

>mmz\_MmarC7\_0098-Ar

ATGGTAAGAAAAATCGCAATTTACGGAAAAGGTGGAATTTGAAAATCAACCACCACACAAAACACAGTAGCTG  
CAATGGCTTACTTTACGACAAAAAAGTTATGATCCACGGATGTGACCCTAAAGCAGACAGTACAAGGTTAAT  
CTTGCACGGTAAACAGCAAAACAACAATGATGGATACATTAAGAGAAAAAGGGGAAGAAGATGTACTCCTGAA  
AAAGTTATCGACGTCGGATTCTGTGGCGTAAAATGTGTAGAATCAGGAGGACCTGAGCCAGGAGTGGGATGTG  
CAGGTAGAGGTGTTATCACTGCAATTACACTCATGGAACAACAAGGTGTTCGAAAGACAACCTTGACTACGT  
ATTCTTCGATGTTTTAGGGGACGTTGTATGCGGTGGATTTCGCAATGCCTGTAAGAGATGGTAAAGCAGACGAA  
ATCTACGTTGTAGCATCAGGAGAAATGATGGCTCTTACGCTGCAACAACATTTGTAAAGGAATGGTTAAAT  
ACGCAGAACAAAGTGGTGTAAAGCTTGGAGGAATCATCTGTAACAGTAGAAACGTAGATGGTGAAGTTGAATT  
ATTACAAGAATTCTGTGACAAAATTGGAACACAATTAATCCACTTCGTTCCAAGAGACAACATCGTTCAAAAA  
GCAGAGTTCCAGAAAAATGGCTGTTGTTGACTTCGATGACTCATGTAACCAAGCAATGGAATACAAAGCACTTG  
CACAAAAATCATTGACAACAAAAACCTTGTAATTTCCAACCCCAATGACAATGGACGAATTAGAAGAATTAAC  
TTCAAAATACGGTTTCTTAGATTAA

>mvn\_Mevan\_0065-Ar

ATGGTAAGAAAAATCGCAATTTATGAAAAGGTGGGATTTGGGAAGTCAACAACCACCCAAAATACGGTAGCAG  
CAATGGCATATTTTACGATAAAAAGGTATTTATCCACGGCTGTGACCCGAAAGCAGACAGTACAAGGTTAAT  
CTTGCACGGAAAACAACAACAACAATGATGGACACATTAAGGGAAAAAGGGGAAGACGAATGTACTCCTGAT  
AAAGTTATTGAAACCGGATTTTGTGGAGTCAGGTGTGTAGAATCAGGTGGGCCGGAACCAGGTGTGGGGTGTG  
CAGGTAGAGGCGTTATAACCGCAATTACACTCATGGAACAACACGGTGTTCGAAAGACAACCTTGACTTCGT  
ATTCTTCGATGTTTTAGGGGACGTTGTATGCGGTGGATTTGCAATGCCTGTAAGGGACGGTAAAGCAGACGAA  
ATCTACGTTGTAGCATCGGGAGAAATGATGGCTCTTACGCTGCAACAACATCTGTAAAGGAATGGTTAAAT  
ACGCACAACAAAGCGGTGTAAGACTCGGTGGTATCATCTGTAACAGCAGAAACGTGGATGGTGAAGTTGAATT  
ATTACAAGAATTCTGTGATAAATCGGAACACAATTAATCCACTTCGTTCCAAGGGACAACATCGTTCAAAAA

GCAGAGTTCAGAAAAAGCCGTAGTTGACTTCAACGACACATGCAACCAAGCAATGGAATACAAAGAACTCG  
CAAGAAAAATCATCGAGAACAAAAACCTCGTAATCCCAACACCAATGACAATGGACGAATTAGAAGAATTAAC  
TTCAAAATACGGTTTTCTTAGATTAA

>mmg\_MTBMA\_c01460-Ar

ATGGTACGTAATAATTGCAATATATGGTAAGGGTGAATCGGAAAATCCACAACACAGCAGAACACTGCAGCGG  
CAATGAGCTACTTCCATGGAAAAACGTGATGATCCATGGATGCGACCCCAAGGCAGACAGCACACGCCTTAT  
ACTGGGCGGTAAAATGCAGACAACCATGATGGACACCCTGCGTGAACCTGGGAGAAGGTGCATGCACACCAGAC  
AAGGTTATAGAAACAGGATTTGGAGGTATAAGGTGTGTGAATCAGGAGGTCCAGAACCAGGTTGTCGGATGCG  
CAGGCAGGGGTGTTATAACCGCCATAACCCTCATGGAGAGGCATGGGGTCTATGAAAACGACCTGGACTTTGT  
ATTCCTTTGATGTGCTCGGTGACGTGGTATGCGGGGGTGTGCAATGCCGGTGGAGAGACGGAAAGGCGGAGGAA  
ATATACATCGTGGCATCAGGTGAGATGATGGCACTCTATGCCGCCAACACATCTGCAGGGGTATGGTGAAT  
ATGCACGGCAGAGTGGCGTCAGACTTGGGGGGATAATATGCAACAGCAGAAACGTTGATGGCGAAAGGGAAC  
CCTTGAAGAATTCTGTGAAAGAATAGGGACACAGATGATACACTTCGTGCCAAGGGATAACATCGTACAGAAG  
GCAGAATTAACAAAAAATCTGTCATAGAGTTCGACCCCGAGTGAACCCAGTACAGGAGTACAGGGAACCTG  
CAAGGAAAATAATTGAAAACACAGATTTTGTAAATACCAGAACCATGACAATGGATGAAATGGAGGACCTCGT  
TGTAATAATACGGGGTTCTGGACTAG

>meth\_MTH1560-Ar

ATGTTTCAACAATTGAAAATGTGCGGAAGGCAGAAGCATACTTCCGGCAATGTTGAAGATGGTGAATGGTGC  
TGGTAAGAAAAATCGCGATATATGGAAAGGGTGAATCGGAAAATCCACAACACAGCAAAAACACTGCAGCTGC  
AATGAGCTACTTCCATGGTAAAATGTGATGATCCATGGATGTGACCCAAAGGCAGATAGCACACGCCTGATA  
CTTGGAGGTAAAATGCAGACAACAATGATGGATACCCTCCGTGAACCTGGAGAGGTTCGCATGTACACCGGATA  
AGGTTATTGAAACAGGCTTTGGGGGAATAAAAATGTGTTGAATCAGGAGGTCTGAACCCGGCGTAGGATGCGC  
TGGCAGGGGGGTGATAACTGCAATAACCCTCATGGAAAGACATGGAGTCTATGAGAAGGACCTGGACTTTGTA  
TTTTTTGATGTACTGGGTGACGTTGTGTGTGGGGGCTTTGCAATGCCTGTTAGGGATGGGAAAGCGGAAGAGA  
TATACATAGTGGCATCTGGGGAGATGATGGCACTCTATGCAGCCAATAACATCTGTAAAGGGATGGTTAAATA  
TGCCAGGCAGAGCGGAGTGCGTCTCGGGGGCATAATATGCAACAGCAGAAACGTTGATGGGGAGAAAGAGCTT  
CTTGAAGAATTCTGTGAAAGAATAGGTACACAGATGATACACTTTGTTCCAAGGGACAACATAGTACAGAAGG  
CTGAATTAACAAAAAATCGGTCATAGAATTCGATCCAGAGTGAACCCAGTCCAGGAGTACAGGGAACCTCGC  
AAGGAAAATAATTGAAAACAAGGACTTCGTGATACCTGAACCAATGACAATGGATGAAATGGAGGAACTCGTT  
GTAAAATACGGAGTTATGGATTAG

>mac\_MA3895-Ar

ATGAGACAAATAGCAATTTATGGAAAGGGCGGCATTGGAAAATCAACTACTACGCAGAACTTACTGCGGCC  
TCTCGACTATGGGGAACAATATTCTTCTTGTAGGGTGCACCCAAAAGCAGACTCTACCAGAAATGCTGCTTGG  
AGGCCTGAACCAGAAAGACCGTACTTGACACTCTTAGAAGCGAAGGTGACGAAGGAATCGACCTTGATACTGTT  
CTGCAGCCAGGCTTTGGAGGCATCAAATGTGTAGAATCCGGGGGTCTGAACCCGGGGGTAGGATGCGCAGGCC  
GAGGTATTATCACCTCCATCGGACTGCTCGAAAACCTGGGAGCTTACACTGACGATCTTGAATATGTATTCTA  
CGACGTGCTTGGTGACGTTGTATGCGGTGGTTTTGCCATGCTTATCCGCGAAGGAAAAAGCCAAGGAAATTTAC  
ATCGTGGCCAGTGGAGAACTGATGGCAATTTATGCAGCAAACAATATCTGCAAAGGTCTGGCCAAATTCGCTA  
AAGGTGGAGCCCGTCTCGGAGGCATCATCTGTAACAGCAGGAAAGTAGATGGAGAACGTGAACTCCTTGAAGC  
ATTCGCAAAGAACTGGGAAGTCACCTGATCCACTTCGTGCCAGAGACAACATCGTCCAGAGGGCAGAAATC  
AACAGAAAGACAGTAATCGACTTTGATCGAGAATCCGACCAGGCAAAGGAATACCTCACCCTTGACAGACAACG  
TCCAGAACAACAACAACACTCGTGGTTCCAACCCCACTCCCGATGGAAGAGTTAGAAGCTATGATGGTGAAT  
CGGAATCGTTGAGCTGTAA

>mma\_MM\_0719-Ar

ATGAGACAAATAGCAATCTACGGAAAGGGCGGTATAGGAAAATCCACTACCACGCAGAACTTACTGCAGCCC  
TTGCGACTATGGGAAACAAAATTTCTCCTTGTGGGATGTGACCCCAAAGCAGACTCTACCAGAAATGCTGCTTGG  
CGGCCTGAACCAGAAAACCGTGTGACACACTCAGAAAGTGAAGGAGACGAAGGAGTAAACCTTGACGTGCTT  
GTACAGCCAGGTTTTGGGAATATTAATGTGTGGAATCAGGAGGGCCGAGCCGGTGTAGGATGTGCAGGCA  
GGGGCATTATTACTTCCATAGGGCTGCTCGAAAACCTGGGAGCCTACACTGAAGACCTTGAATATGTATTCTA  
CGACGTGCTTGGTGACGTCGTGTGCGGAGGTTTTGCCATGCCAATCCGTGAAGGAAAAAGCCAAGGAGATCTAC  
ATGTTGCCAGTGGGGAACGATGGCAATTTACGCAGCAAACAACATCTGTAAAGGACTTGCCAAGTTTGCCA  
AAGGTGGAGCCCGTCTTGGAGGCATCATCTGTAACAGCAGAAACGTAGACGGAGAACGTGAACTTCTTGAAGC  
ATTCGCGAAGAACTGGGAAGCCAGCTAATCCATTTCTGTGCCAGGGACAACATCGTTCAGAGGGCGGAAATC  
AACAGAAAACCGTATCGACTTTGACCCAGAATCCAATCAGGCAAAGAATACTGACTCTGCCAGCAACG

TCCAGAACAACACCAAACCTAGTGGTCCCGACTCCGCTCCCTATGGAAGAGTTAGAAGCCATGATGGTGGGAATT  
CGGGATTGTTGAGCTATAA

>mba\_Mbar\_A0171-Ar

ATGAGACAGATAGCAATCTACGGAAAAGGTGGAATTGGAAAATCCACTACTACTCAGAATCTGACCGCGTCCC  
TCTCGACCATGGGCAACAAAATTATGCTTGTAGGATGTGACCCGAAGGCAGATTCTACTAGAATGCTGCTTGG  
TGGCCTGAACCAGAAGACCGTACTTGACACTCTTAGAAGTGAAGGCGATGAAGGAGTTGATCTTGATGTTGTT  
ATGCAGCGGGGATTTGGCGACATAAAATGTGTGGAATCCGGAGGGCCTGAACCAGGTGTAGGATGTGCAGGCA  
GAGGAATTATCACTTCCATCGGGCTGCTTGAAAACCTTGGAGCATATAACCGATGATCTTGATTATGTATTCTA  
CGACGTACTTGGTGTATGTTGTGTGTGGTGGATTTGCTATGCCTATCCGCGAAGGAAAAGCAAAGAGATTTAC  
ATAGTTGCCAGTGGAGAAGTGTGATGGCTATCTATGCTGCAAATAACATCTGTAAAGGACTTGCTAAGTTTGCCA  
AAGGTGGAGCCCGTCTGGGAGGTATCATCTGCAACAGTAGAAATGTGACGGAGAGCGTGAACCTCTCGACGC  
TTTTGCAAAAAAACTGGGAAGTCAGCTAATTCACCTTCATACCCAGGGACAACATTTGTTTCAGAGAGCAGAAATT  
AACAGGAAGACTGTAATTTGATTTTGACCCAGAATCCAACCAGGCAAAGAGTACCTGACTCTTGCCCAACAACG  
TCCAGAACAACGACAAACTTGTGTCCCAACTCCGCTTCCAATGGAAGAGTTAGAATCAATGATGGTTGAATT  
CGGAATTGTTGATATGTGA

>mbn\_Mboo\_1142-Ar

ATGACACGACAGGTGGCAATTTACGGAAAAGGCGGTATCGGAAAATCGACAACAACCCAGAACACGGTGGCGG  
CGCTTGCCGAGGCGCGAAAGAAGATCATGGTGGTTCGGCTGCGACCCGAAAGCGGATTCACCCGGCTCCTGCT  
GCACGGGCTCTGCCAGAAGACGGTGTGATACGCTCCGTGATGAAGGGGACGATATCGAGCTTGACGCAATC  
CTGAAACCCGGCTTTAAGGAAACAATGTGCGTGGAAATCGGGAGGCCCGAGCCCGGCGTGGCTGTGCGGGAC  
GCGGTATTATTACCTCGATCAACCTGCTCGAATCGCTGGGAGCGTACACGCCCGATCTCGACTACGTGTTCTA  
CGATGTGCTCGGTGATGTGGTCTGCGGGGGTTTTGCCATGCCGATCCGTGAGGGCAAGGCCCAGGAGATCTAC  
ATTGTCGCATCCGGGGAACCTCATGGCCCTCTATGCGGCAAACAACATCTCCAAAGGTATCCAGAAATACGCGG  
TAAACGGCAAAGTCCGGCTTGGCGGGATTATCTGCAACAGCCGGAAGGTGATAACGAGCGTGCCTGCTCCA  
GGCGTTTGCCGAAGAAGTCCGGTTCGAGTTGATCTACTTTGTCCCGCGTGACAACCTTGTCCAGCGTGGCCGAG  
ATCAACAAGAAAACCGTTGTGGACTTCGATCCGACATCCGGCCAGGCCAGCGAATACCGCAGCCTTGGCCGAGG  
CTATCGACAAAAACAAGATGTTTGTGTGCCAAAGCCCATGACCCAGGATCGGCTTGAGGAACTCATGATGCA  
ACACGGGTTCTGGATGCAATTGCCTAA

>rci\_RCIX1606-Ar

ATGCGACAAGTGGCAATTTACGGAAAAGGCGGCATAGGCAAGTCTACCACGACGCAGAAATACGGTAGCTGCGC  
TGGCCGAGTCGGGCAAGAAGGTTCATGGTTCGTAGGCTGCGACCCGAAAGCCGATTCCACCAGGCTGCTGCTCCA  
CGGGCTGAACCAGAAGACGGTGTGGACACCCTGCGGGACGAGGGCGACGACATAGAGCTCGAGTCCATCCTC  
AAGACGGGCTTCGGCGAAAACCCGGTGTGTGGAGTCCGGCGGCCCGAGCCGGGAGTGGGCTGCGCTGGCCGTG  
GCATCATCACCTCGATCAACATGCTGGAGCAGCTCGGCGCTTACACCGACGACCTGGACTACGTCTTCTACGA  
TGTGCTGGGCGACGTCGTCTGCGGTGGTTTTGCGGATGCCCATTCGCGAGGGTAAGGCCCGGGAGATCTACATC  
GTGGCGTCCGGCGAGCTGATGGCCCTCTACGCGGCGAACAACATCGCCAAAGGCATAAAGAAGTACGCCGAGA  
CCGGCGGAGTCAGGCTGGGCGGCATCATCTGCAACAGCAGGAAGGCGGACAACGAGTACGCCCTGGTCAAGGC  
GGTCGCCGAAGAGATAGGCACCCAGATGATCCACTTCGTCCCGAGGGACAACATCGTCCAGCGGGCGGAGATC  
ACAAGATGACGGTCATCGACTTCGACCCCGCTGCAAAACAGGCGAACGAGTACCGGAAGCTCGCGAAGGCGA  
TCGACGAGAACCAGATGTTGTCGTCCCGAAGCCCATGACCCAGGACAGGCTGGAGGAGCTGATGATGAAACA  
CGGGTTCTGGACCGGGTGTGA

>mpl\_Mpal\_0561-Ar

ATGAAAAGACAGGTAGCAATCTACGGAAAAGGCGGAATCGGAAAAGTGCACAACAACCCAGAACACTGTGCGGG  
CACTGGCTGAACAGGGGAAGAAGATCATGGTGGTTGGATGCGACCCCAAAGCCGACTCCACCAGACTTCTGCT  
CCACGGACTCTGTGAGAAGACAGTGTGGACACCCTGCGGGACGAAGGAGACGATATCGAACTGGACGAGATC  
CTCAAACCGGGATATCGGGACACCCTCTGTGTTGAATCAGGAGGCCCGGAGCCTGGCGTTGGATGTGCCGGCC  
GTGGTATCATCACGTCGATCAACCTGCTGGAGTCACTCGGGGCATATAACCGACGACCTGGACTATGTCTTCTA  
CGATGTGCTTGGGGATGTCGTCTGCGGGGGTTTCGCGATGCCAATCAGGGAAGGAAAAGGCAGAGGAGATCTAT  
ATCGTCGCCTCCGGGGAGTTGATGGCGCTGTATGCGGCCAACAACATCGCCAAGGGGATCCATAAGTACGCCG  
TATCAGGCAAGGTGAGGCTGGGAGGAATCATCTGCAACAGCCGACAGGTCGACAATGAGTATCCCTCCTCAA  
GGCATTGCGGAGGAACTTGGATCCCAGTTGATCTACTTTGTCCACGGGACAATCTGGTGCAGCGGGCTGAG  
ATCAATAAGAAGACGGTGTGACTTCGAACCGGAGTCCAACCAAGCTGAGGAATACAGGCAGCTGGCCAAGG  
CCATTGATGAGAACAGGATGTTTGTGTCATCCCGAAACCGATGACACAGGACCGGCTGGAAGAAGTGTGATGCA  
GCATGGATTTCATGGATGCCTTGTGTAA

>mpi\_Mpet\_0263-Ar

ATGCGACAGATAGCAATTTACGGAAAGGGTGGTATCGGAAAGTCGACTACCACACAGAACACAGTAGCGGCAC  
TTGCAGCTTCAGGAAAGAAGGTCATGGTAGTCGGGTGCGACCCGAAGGCCGATTCAACGAGGCTTTTGCTCCA  
CGGACTATGCCAGAAGACGGTGTGACACACTAAGGGATGAAGGAGACGACATAGACCTTGAGGATGTCCTC  
AAGCCCGTTTTCGGAGAGACTATGTGCGTTGAATCCGGAGGTCCTGAACCTGGTGTAGGCTGTGCAGGAAGGG  
GTATCATCACATCGATCAACCTCCTTGAATCACTCGGTGCATATAACCGACGATCTCGACTACGTCTTCTACGA  
TGTCTTGGTGATGTCGTATGCGGAGGATTGCAATGCCTATCCGTGAAGGAAAGGCTCAGGAGATCTATATC  
GTTGCCTCAGGAGAACTGATGGCACTCTACGCTGCAACAACATCTCCAAGGGTATCCAGAAGTATGCCGAAA  
CAGGCGGTGTAAGGCTCGGGGAATCATATGCAACAGCCGTAAGGTGACCCAGAACTCGAACTCCTCCAGGC  
ATTTGCAACAGAACTCGGCTCGCAGCTCATCTACTTCGTTCCCCGTGACAACCTCGTCCAGAGGGCGGAGATC  
ACAAGAAGACAGTCGTCGATTTTCGATCCCGAATCCAACCAGGCAAACGAGTACCGCAGCCTTGCAGCTGCAA  
TCGACGGCAACAAGATGTTGTCATCCCGAAGCCCATGAGCCAGGATCGCCTCGAAGAATAATGATGGAGCA  
CGTTTTCTCGGACTCTGA

>mka\_MK1416-Ar

TTGAAAGGATCGCCGTCTACGGGAAGGGCGGGATAGGGAAATCCACGATCGCGGCGAACGTGGCCGCAGCCC  
TGGCCGAGGAAGGTTATCGGGTCATGCTGGTAGGATGTGATCCAAAGGCGGACTCGACCCTGACGCTCGCTGG  
ACGTAGGATTTCCACGGTGATGCACGAGTATCGGAGGAAAGGGGAAGGCCTGAAGCTCGAGGACATCATCGTC  
GAAGGTGATTTTCGGGGTCTTGTGCGTCGAGTCCGGTGGGCCGAAGCCCGGGTCCGATGCGCGGGGCGCGGTG  
TGCTGAAGGCCCTCGAGATGTTGACTAGAATGGGGGCGTTCGAGGACGTCGACGTGGTGATCTTCGACGTGCT  
CGGTGACGTGGTGTGCGGTGGATTTCGCCCTACCGATCCGCCGAGGCTACGCGGATACCGTTTTCTGGTTACA  
TCCAGTGAACCGATGTCCCTATACGCCCAACAACATCTGCCGCGGGATCGCCGAGTACGCCGATCGAGGGG  
GCGGAAACTCGGTGGGGTTATCCATAACCGGCGCTCCCGAGACTCGGATTTCTAGAGTGGTGACCGAGTTCTG  
CCGGCAATCCGAGCCGAGCTGATTTACGATCTGTTTTACATGGAAGAGGTGCGGAAGGCTGAGTCCGCGGTAC  
CGTACCGTGATCAGGGAGTTTCCGGATTCGGACGCGGCAGAGGCGTTCCGCGAGCTTGCACAGGATGCTCG  
AGACGGAAGGTGTCGTACCTCAACCGCTCGAAGAAGAGGAGGTGCTGAGACTCGCGGGCGTGGGTTCTGA

>mcj\_MCON\_0607-Ar

ATGAGGCAGATAGCCATTTACGGCAAAGGCGGAATCGGCAAGTCGACCACCACCCAAAATCTCACAGCAGCCC  
TCTCGACCATGGGCAAGAAGATCATGCAGATAGGCTGCGACCCCAAAGCAGACTCCGTGAAGATGCTCATGAA  
CGGCAAGAGACAGCCATCAGTTCTTGACACCCTTCGAAAGGAAGGAGAAGGAGAATTGGATGACGTACTGAAG  
ACCGGCTTTGGAGGCATTCGCTGCGTCGAGTCCGGAGGCCCCGGAACCGGGCGTGGGCTGTGCAGGTCGCGGGA  
TAATCACCTCCATCGGCCTCCTTGAGAACCTGGGAGCCTACACCCAGACCTCGACTATGTCTTCTACGACGT  
CCTGGGAGACGTGCTCTGCGGCGGCTTCGCTATGCCCATCCGGGAAGGAAAGGCCAGGAGATCTACATCGTG  
GCCTCCGGAGAGATGATGGCTCTTTATGCCGCCAACAACATCTGCAAGGGCATCCAGAAGTTCCGCCGAGTCCG  
GCGGAACGCGTCTGGGCGGCATCATCTGCAACTCCAGAAAAGTTCGACCCGGAACGGGAGCTGGTAAGCGCTTT  
TGCCGAGAAGATCGGCAGCCAGATGATCCAGTTTCGTGCCAGAGACAACATCGTCCACCAGTCAGAGATCCAC  
AAGCAGACAGTGATCCAATATGCTCCAGACTCAGACCAGGCCAAAGCCTATTTGGCGCTGGCCAAGGCCGTGG  
ACGAGAACCAGATGTTTCGTTATCCCAAAGCCGATGGAGTATGAAGAGCTGGAACAGGTGATGATGGAATGGGG  
TGTTGTGGAATGA

>mig\_Metig\_1207-Ar

ATGAAGCAAATAGCATTTTATGGGAAAGGAGGAATTGGAAAATCAACAACACTGTCTGTAATATAGCGGCGGCAT  
TGGCAGATGAAGGGAAAAGGGTTATGGTTGTTGGTTGCGACCCGAAGCATGATTGTACATCGAATTTAAGGGG  
AGGAGAAGAGATTTCAACGGTTTTAGATACGTTGAGAGAGAAAGGTATGGAGAAAATGAGTTTAAAGTATATA  
GAAAAGAGAATAGACATAGATGAGATTGTTTATAAGGGATATAAGGGCATTTATTGTATTGAGGCGGGGGTTC  
CTAAGCCGGGTTATGGGTGTGCTGGGAGGGGTGTTATTGTTGCTATTGATTTGTTAAAGAAGATGAATGTTTT  
TGAAGAGTTGGGAGTTGATGTTGTTTTATATGATGTCTTGGGGATGTTGTTTTGTGGGGGGTTTGCCATGCCT  
TTGAGGATGGGGTTGGCTGAGCAAATTTATATTGTTACTTCTTCCGATTACATGGCTATGTATGCTGCAACA  
ATATTTGCAGAGGGATGAAAGAATTTGCAAAAAGAGGTGGAAGTAGGTTAGGTGGTTTTAATTTATAACGTTAG  
GGTTCTTTGGATGCGGAGGATATTGTTACTGAGTTTGCTAAAAAATTGGGAACTGAGATTATTGGTAAAATT  
CCAAATCTTTGTTAATGCTGAGGCGGAGATTGAGGGTAAGACGGTTATTGAATATGCCCCAGACAGTGAGA  
TTGCATCAATTTATAGAGAACCTGCTAAGAAGATTTACAAAAATAAAAATGGAGTTATCCCAAATCCATTGGA  
AAATGAAGAGATTATGCAGATTGGAAGAGAGTTAAGGAGAGAATTAGGAGTTTAAAGGCTTTAA

>mig\_Metig\_1419-Ar

TTGAAACAGATCGCTTTTATGGGAAAGGGGGAATTGGTAAATCGACGACTGTCTGTAATATAGCGGCGGCAT  
TGGCAGATGAGGGGAAAAGGGTTATGGTTGTTGGTTGTGATCCGAAGCATGATTGTACATCGAATTTAAGGGG

AGGAGAAGAGATTCCAACGGTTTTAGATACGTTGAGGGAGAAGGGTATGGAGAACTCAGTTTGGAGGATGCA  
ATAGAGGGAAAAAAGATTGAAATGGATGAGATTGTTTATAAGGGATATAAGGGTATTTATTGTATTGAGGCAG  
GGGGTCCATAAACCGGGTTATGGGTGTGCTGGGAGGGGTGTTATTGTTGCTATTGATTTGTTAAAGAAGATGAA  
TGTTTTTTGAAGAGTTGGGAGTTGATGTTGTTTTATATGATGCCTTGGGGATGTTGTTTGCGGTGGATTTCGCG  
ATGCCTTTGAGGATGGGGTTGGCTGAGCAAATTTATATGTTACTTCTTCCGATTACATGGCTATGTATGCTG  
CAAACAATATTTGCAGAGGGATGAAAGAATTTGCAAAAAGAGGTGGAAGTAGGTTAGGTGGTTTAATTTATAA  
CGTTAGGGGTTCTTTGGATGCGGAGGATATTGTTACTGAGTTTGTCTAAAAAATTGGGAACTGAGATTATTGGT  
AAAATTCCAATTTCTTTGTTAATTGCTGAGGCGGAGATTGAGGGTAAGACGGTTATTGAATATGCCCCAGACA  
GTGAGATTGCATCAATTTATAGAGAAGTTGCTAAGAAGATTTACAAAAATAAAAAATGGAGTTATCCCAAATCC  
ATTGAAAACAAGGAATTAATGCAAATTTGGATTGGCTATTAAGGAAAGGATTAAAAAAATGAGGAACTAA

>mae\_Maeo\_0506-Ar

GTGAAACAAATAGCATTTTATGGAAAAGGAGGAATTGGTAAATCTACAACAGTATGCAATATAGCGGCGGCAC  
TTGCAGATGAGGGAAAAAAGGTAATGGTAATCGGGTGCACCCAAAACACGACTGCCTTCAAATTTAAGGGG  
AGGGGAAGAGATTCTACAATATTGGACACGCTGAGAGAAAAAGGAATGGAAAAACTCAGTTTAGAGGATGCA  
ATAGAGGGAAAAAAGATTGAAATGGATGAAATCATCCATAAAGGGTATAATGGCATATACTGCATTGAGGCAG  
GAGGACCAAAGCCAGGATACGGATGTGCTGGAAGGGGTGTCATTGTAGCAATAGATTTGTTAAAGAAAATGGA  
TATATATGAGGAATTAGGCGTGGATATAGTTCTTTATGATGTTCTTGGAGATGTTGTTTGTGGAGGATTTGCC  
ATGCCTTTAAGAATGGGATTGGCTAAGCAAATTTATGTTGTAACCTTCTCCGACTACATGGCAATGTATGCGG  
CAAATAATATATGCAGAGGCATGAAGGAATTTGCTAAAAAAGGAGGAAGTAGGCTGGGAGGATTAATTTACAA  
TGTTAGGGGCTCATTAGATGCTTATGATTTAGTTGAAGAAAATGGCCAATAAAAATAGGAACTGAGATTACAGGC  
AAAATTCCAATTTCCATGCTTATTGCTGAGGGTGAGATTGAAGGAAAAACTGTAATTGAATATGCTCCTGACA  
GTGAAATTTTCTATTTTATAGAGAGCTCGCCAGGAAGATTTATGAAAATGATATGGGCGCAATCCCAAATCC  
CCTGAAAATGAAGAAAATAATGCAAATTTGGGCAGGCAGTCAAGGAAAGAATTAAAAAAATGAAGAACTAA

>mmx\_MmarC6\_0803-Ar

TTGAAACAGATTGCGTTCTACGGAAAAGGAGGCATTGGAAAATCAACTACAGTTTGTAAATTTGGCTGCGGCAT  
TATCAAAAAGTGGTAAAAAAGTTATCGTTGTAGGATGCGATCCAAAACATGACTGTACTTCTAATTTAAGGGT  
TGCGGAAGATATACCTACTGTTTTAGATGTTTTGAGAGAAAAAGGAATTGATAAACTCGGAATTGAAACCATA  
ATTCGCGAGAATTTATTAAAAAAAGAAGATATAATTTATGAAGGATTCAATGGAATTTACTGTGTTGAGGCAG  
GCGGTCCAAAACCAGGATACGGCTGTGCCGGACGGGGCGTGATAGTTGTAATTTGATCTTCTCAAAAAAATGAA  
GGTTTTTTGAAGAACTTGGCGTTGATGTAGTTCTTTACGATGTTTTAGGGGACGTTGTATGCGGAGGATTTGCA  
ATGCCACTTAGAATGGGGCTTGCTGACCAGATTTACGTTGTAACCTTCTTCAGATTACATGGCGCTCTATGCAG  
CAAACAATATCTGCAATGGAATAAACCAGTTTGTAAAACGTGGAGGAAGTACGCTTGGAGGAATAATATACAA  
TGTCAGGGGATCAATGGATGCGTTTGTATTTGTAAGCGAATTTGCAAGTCAATTAATGCAAATATCATTGGA  
AAAGTTCCAATTTCTCCAATAATTAATGAAGCTGAGATTGATGGACAGACTGCAATAGAATACGCTCCAGAAG  
AAGAAATAAGTAAAATATACATGGAACCTTGAGAGAAAAATATATGAAAATAATACTGGAACGACCCCTAACCC  
CTTAGAAAACGCCCAAATAATGCAGATTGGAAAAATGATTAAGGAAAGAATAAAAAAGCAGAAAATTTGTCGAG  
TAA

>mmz\_MmarC7\_1147-Ar

TTGAAACAGATTGCGTTCTACGGAAAAGGAGGCATTGGAAAGTCGACTACTGTTTGTAAATTTGGCAGCGGCAT  
TATCAAAAAGTGGTAAAAAAGTTATCGTTGTAGGATGTGATCCAAAACACGATTGTACGTTCCAATTTAAGACG  
TGGTGAAGATATACCTACTGTTTTAGATGTTTTGAGAGAAAAAGGAATTGATAAACTTGGAAATTGAAACCATA  
ATTCGCGAGAATTTATTAAAAAAAGAAGACATAATTTACGAAGGATTTAATGGAATTTACTGCGTTGAAGCAG  
GCGGCCAAAACCCGGGTACGGCTGTGCCGGAAGAGGAGTGATTGTTGTAATCGACCTCTTAAAAAATGAA  
CGTTTTTTGAAGAACTCGGTGTAGATATAGTTATTTATGATGTTTTAGGGGATGTTGTGTGCGGAGGATTTGCA  
ATGCCGCTTAGAATGGGGCTTGCTGACCAGATTTACGTAGTAACCTTCTTCAGATTACATGGCGCTCTATGCAG  
CAAACAATATCTGCAACGGAATAAGCCAGTTTGTAAAACGTGGAGGAAGTACACTTGGAGGCATTGTATACAA  
CGTCAGGGGATCTATGGATGCATTTGATATTGTAAGTGAATTTGCGAGTCAGTTAAATGCAAATATCATTGGA  
AAAGTTCCAATTTCTCCAATAATTAACGAAGCTGAAATCGATGGACAGACTGCAATAGAATACGCTCCAGAAG  
AAGAAATAAGTAAAATATACATGGAACCTTGAGAGAAAAATATATGAAAATAATACTGGAACGACTCCAAAACC  
GCTTGA AACGCCCAAATAATGCAGATTGGAAAAATGATTAAGGAAAGAATAAAAAAGCAGAAAATTTGTCGAA  
TAA

>mmq\_MmarC5\_1528-Ar

ATGTACTATATTGTTTTAATTAAATTGCGAGAATCCCCATATTTAGGTTAATCGGTGATATTTTGAACAGA  
TTGCGTTCTACGGAAAAGGTGGCATCGGAAAGTCGACTACGGTTTGTAAATTTAGCAGCGGCATTATCAAAACG



TGGCAAAAAAGTTATCGTTGTAGGATGCGACCCGAAACACGATTGCACCTCCAATTTAAGAAGTGGTGAAGAC  
ATACCCACTGTTTTAGATGTTTTGAGAGAAAAAGGAATTGATAAACTCGGAATTGAAACCATAATTCGCGAGA  
AATTACTTGAAAAAGAAGATATAATTTACGAAGGATTTAATGGAATTTACTGCGTTGAAGCAGGAGGTCCAAA  
ACCAGGATACGGCTGCGCTGGAAGGGGTGTGATTGTTGTAATTGACCTTTTGAAAAAATGAAAGTTTTTGAA  
GAACTCGGTGTTGATGTAGTCTTTACGATGTTTTAGGAGATGTTGTGTGCGGAGGATTTGCAATGCCACTTA  
GAATTGGCCTTGCTGACCAGATATACGTTGTAACCTCTTCAGATTACATGGCACTTTACGCGGCAAACAACAT  
CTGCAGTGAATAAGCCAGTTTGTAAAACGTGGAGGAAGTACACTTGGAGGAATAATATACAATGTCAGGGGC  
TCTATGGATGCATTTGATATTGTAAGTGAATTTGCAAACCAGTTAAATGCAAACATTATTGAAAAAGTTCCAA  
ATTCCTCAATAATTAACGAAGCCGAAATCGATGGGCAAACGCAATAGAATATGCTCCAGAAGAAAAATAAG  
TGAAATATATATGGAACCTGCAGAAAAAATATATGAAAATAACTGGAACGACACCTAACCCCTAGAAAAC  
GCTCAAATAATGCAGATTGAAAAAATGATTAAGAAAAGAATAAAAAAGCAGAAAATTGTGCAATAA

>mmp\_MMP0147-Ar

ATGTACTATATTGTTTTATTAATTTTACGAGAATCCTTCATATTCATGTTAAACGGTGATATTTTGAAACAGA  
TTGCATTTTACGGGAAAGGAGGCATTGGAAAGTCCACTACTGTTTTGTAATTTAGCAGCTGCGCTATCCAAAAG  
TGGTAAAAAAGTTATCGTTGTTGGATGCGACCCAAAACACGATTGTACATCTAATTTAAGAAGTGGAGAAGAT  
ATTCCTACTGTTTTAGATGTTTTGAGGGAAAAGGGAATCGATAAACTCGGGATTGAAACTATAATTCGCGAAA  
ATTTACTAAAAAAGAAGATATAATTTATGAAGGATTTAACGGGATTTACTGCGTCGAAGCAGGCGGCCAAA  
ACCAGGATATGGATGTGCAGGAAGAGGGGTGATTGTTGTAATAGACCTCCTCAAAAAAATGAACGTTTTTGAA  
GACCTAGATGTTGATGTAGTACTTTACGATGTCTTAGGCGATGTTGTGTGCGGAGGATTTGCAATGCCGCTTA  
GAATGGGTCTTGCTGACCAGATTTACGTTGTAACATCTTCAGATTACATGGCGCTCTATGCTGCAAATAATAT  
ATGCAGTGAATAAGCCAGTTTGTAAAACGTGGAGGAAGTACCCTTGGAGGTATAATTTACAACGTAAGGGGT  
TCAATGGACGCATTTGATATTGTAAGTGAATTTGCAAACCAGTTAAATGCAAACATTATTGAAAAAGTTCCAA  
ATTCCTCAATAATCAATGAAGCTGAAATTGATGGACAGACCGCAATAGAATATGCTCCAGAAGAAGAAATAAG  
TAAAATATATATGGAACCTGCAGAAAGTATATACCAAATAACTGGAACCATGCCAATCCATTGAAAAAC  
GCCAATAATGCAGATTGAAAAAATGATTAAGAAAAGAATAAAAAAACAGAAAATTACTGAATAG

>mvn\_Mevan\_1152-Ar

TTGAAACAGATTGCATTTTACGGAAAAGGAGGGATTGGAAAGTCAACTACAGTATGTAACCTTAGCCGCAGCAC  
TGTCAAAAAGCGGAAAAAAGGTTATTGTCGTTGGTTGTGATCCAAAACATGACTGTACATCAAATTTAAGAGG  
TGAATAGAAATTCACACCGTTTTAGACATTTAAGAGAAAAAGGAATAGATACGTTGGGAATAGATACAATA  
ATTCATGAAAATTTGCTTAAAAAAGAAGATATACTTTACAAAGGATTTAATGGCATATACTGCGTTGAAGCTG  
GGGGCCCTAAACCCGGATACGGTTGTGCAGGGCGAGGAGTTATTGTAGTTATTGATTTACTTAAAAAATGAA  
TGTTTTTAAAGATTTAGGCGTTGATATTGTTCTTTATGACGTTTTAGGAGATGTTGTTTGTGGAGGATTTGCA  
ATGCCCTTAAGAATGGGATTAGCCGACCAAGTGTATGTTGTAACATCTTCAGACTACATGGCATTATATGCTG  
CAAATAATATATGTAATGGAATGAGTCAATTTGCCGTTCTGTCGGGGAGCAATTTAGGCGGCATTATTTATAA  
CGTTAGGGGTTCAATGGACGCCTTTGATATCGTTGATGAATTTGCAAAACATTTAAATGGTAAAATAATTGGA  
AAGGTTCCAAATTCGTCAATAATAAATGAAGCAGAAATGATGGAAAAACTGCGATTGAATATTCGCCTGATT  
CAGAAATAAGTAATATTTACATAGAACTTTCAAAAAAATTTACGAAAACAATTTCTGGAACAGTTCCAAAACC  
ACTTGAAAATATTTCAAATAATGCAGATTGAAAAAATGATTAAGGAAAGGCTTAAAAAAGAGAGGATTTTAGAA  
TAA

>mif\_Metin\_0054-Ar

TTGAAACAGATAGGGTTTTATGGGAAAGGGGAATAGGGAAAGAGTACAACAGTTTGTAAATATAGCCAAGGCC  
TCTCTGAGGAGTATAGGGTTTTAGTTATTGGCTGTGATCCTAAGGCTGATTGTACAGCTTTACTAAGAGAGGA  
AGATATAAAAACGTCTTAGAAGTCTTAAGGGAGAAAAGAAGTGTGAAGATTGAAGATATTGTTGTAGAGGGA  
GGAAAAAATATTTACTGTGTTGAAGCTGGAGGACCTAAGCCAGGAGTTGGCTGTGCTGGAGAGGGGTTATAG  
TGGCTATAGAAACATTTAAAAAATTAATGTCTTTGAAAAATTTAGATATTGACATTGTTCTCTATGACATCTT  
GGGAGATGTTGTCTGTGGTGGCTTCTCCCTACCTTTAAGGTTCTTAGATGATGTTTATATCATAACTTCATCT  
GACTACATGTCTCTTTATGCAGCCAACAATATTGCTATGGGAGTTAAAGAGCTAAAAAATAAATTGTCAGGGG  
TTATTTATAATGTTAGAGGTTCTTATGACAATGAAGAGGTTGTTAAAGAATTCTGTAAAAGAATCAATACTAA  
TTACATTGGAAGATTCCAAACTCTCCATTAGTAGCTAAGTCTGAAGTCTTAGGAAAAGACTGTTATTGAAGCC  
TTTCTGATAGTGATATAGCTAAAATTTATAAAGAGTTAGCAAGGAAAATTTATGAAAAATAGAGAGAAGAGAG  
AGCCAATGCCATTAAGTAAGAGAGAGCTAAAGGAGTTGGCTTTAAATATTTGAAGTGA

>mae\_Maeo\_1224-Ar

ATGGTTAGAAAATTTTTCGCTCTATGGAAAGGGAGGAATTGGAAAATCTACAAATGTATCAAACATAGCGGCGG  
CACTAGCGGAATCTGGTAAAAAAGTAATGGTCATAGGATGCGACCCAAAGGCAGACTCAACAAGAAATTTAAT

GGGAAGGAAAATTCCAACAGTTTTAGATGCCCTTAGAAAAAATGGTGCCAACAATCTGGAACCTGAAGATATT  
GTTTTTAAAGGATTTGGTGAAACCTACTGTGTAGAAAGCGGAGGACCCGAACCCGGCGTAGGCTGTGCGGGAA  
GGGGAGTAATCACGGCAATAGATATATTGAATAGATTGGAAGCATTGAAACAATAAAAACCCGATGTAATTAT  
TTACGATATTTTAGGAGATGTAGTATGTGGCGGATTTGCCATGCCATTACAGAAACATCTTGCAGATGATGTT  
TATATTGTTACAACCTGCGACCCAATGGCAATTTATGCAGCAAATAACATATGTAAAGGAATAAAAAGATATG  
CCAATAGGGGAAAGGTAGCATTGGGGGGAATTATATACAGTGGAAGAAGTGTAAATAAATGAGCCATCTATTGT  
AGAAGAATTTGCCTCAAAAATGGAACAAATGTAATGGGAAAGGTTCCAATGAGTAATATATTACAAAGGCA  
GAAATTTACAAAAAACAGTAATAGAATATGCGCCAGATAGTGATGTTTTAGAGGTTTTAGAAAACTTGCCG  
ATACAATATATAAAAATGATAAAAAGTTGTTCCAAAACCTTTATCTGAAGAAGGAATTGATGAAATTACTGA  
AAAAATAGACGATTTAATTAAAAATACCATTTAA

>mok\_Metok\_0807-Ar

ATGGTTAGAAAATTTTGTATCTATGGAAAGGGAGGTATTGGAAAATCCACAACCGTATCCAATATAGCCGGAG  
CTCTGGCTGAATCTGGTAAAAAAGTAATGGTCATAGGATGCGACCCAAAGGCAGATTCAACAAGAAATTTGAT  
GGGTAGGAAAATACCAACAGTTTTGGATGTTTTTAGAAAAAAGGGTAATGCTATTAACCTGAAGATATTGTT  
TTTGAGGGATTTTGTGGAACCTACTGTATTGAAAGTGGGGTCTGAACCTGGTGTAGGATGTGCAGGAAGGG  
GAGTAATTACGGCAATAGAGGTATTGAATAGGTTAGGGGCATTTGAAACATTAATCCTGATGTAATTATCTA  
TGATATATTGGGGGATGTTGTTTGTGGTGGATTTGCCATGCCATTACAAAAACACCTTGCAGATGATGTTTAT  
ATCGTTACAACATGCGACCCAATGGCAATTTATGCTGCAAATAATATATGTAAGGGAATAAAAAGATATGCAA  
AAAGAGGAAAAGTGGCATTGGGAGGAATTATATATAATGGAAGAAGCGTAATAAACGAGCCTTCCATTGTAGA  
GGAGTTTGCTTCAAAAATGGAACAAATGTTATGGGAAATGTTCCAATGAGTAATATCATCACAAAGGCAGAA  
ATTTACAAAAAACCGTAATAGAATATGCACCAGATAGCGAGATTGCAGATGTTTTTAGGGAGCTCGCAGATG  
CCATTTATAAAAACGATAAGAGGGTTATTCCAACCTTTATCTGAGGAAGAAATTGACGAGATTACGGAAAA  
GATAGACGATTTATTAAGAAAAGATAGTTATTGTATAA

>mfs\_MFS40622\_1279-Ar

ATGAGGAAATTTTGTGTCTATGGAAAGGGAGGAATTGGAAAATCCACTACGGTGAGTAATATAGCAGCAGCTT  
TGGCAGAGGATGGAAAGAAGGTTTTGGTTGTTGGCTGTGACCCAAAGGCAGATACAACAAGAACTTAGTAGG  
GAGGAAGATTCCAACCTGTCTTAGATGTCTTTAGAAAAAAGGGCCGACAATATGGAATTGGAAGATATTGTT  
TTTGAAGGCTTTGGTGGAGTTTATTGTGTTGAATCTGGAGGGCCTGAACCTGGAATAGGATGTGCTGGGAGGG  
GAGTTATAACGGCAGTTGATATGCTAAATAGATTAGGGGTTTTTGAAGAACTAAAGCCAGATGTGGTTATCTA  
TGATATTCTGGGAGATGTTGTTTGTGGTGGCTTTGCAATGCCTTTACAAAAGCACTTGGCTGATGATGTTTAT  
ATTGTAACCACTTGCACCCAATGGCAATCTATGCGGGAAACAATATATGCAAGGGGATAAAGAGGTTTTGCAA  
GCAGAGGAAAGATTGCACTGGGAGGAATAATTTACAATGGAAGGAGTGTTATAGATGCCCCAGAGATTGTTGA  
AGAATTTGCCAAAAAAATGGAACCTCAAGTTATTGGAAAAATCCCAATGAGTAATTTAATAACAAAGGCAGAG  
ATTTACAAAAAGACAGTTATTGAATATGCCCCAGACAGTGAGATAGCAAATATATTTAGAGAGATTGCAAGGG  
CAATATATGAAAATGAAAAGTAGAGTTGTCCCAATCCGTTATCAGAGGAGGAGTTGGATGAAATTACTGAAAA  
GATTGATGTACTGTTAAAGGAGAGTGTTAAAGAATAA

>mja\_MJ\_0879-Ar

ATGAGAAAATTTTGTGTCTATGGAAAGGGAGGAATTGGAAAATCTACAACCTGTCTCAAAATATTGCAGCAGCTT  
TGGCAGAAGATGGAAAGAAGGTTTTAGTTGTTGGTGTGACCCAAAGCAGATACGACAAGAAATTTAGTTGG  
AAGAAAGATTCCAACAGTTTTAGATGTTTTTAGAAAAAAGGGAGCAGAAAATATGAAATTGGAGGATATAGTT  
TTTGAGGGTTTTGGAGGAGTTTATTGTGTTGAGTCTGGAGGACCTGAGCCAGGGGTTGGATGTGCTGGGAGGG  
GAGTTATTACAGCGGTTGATATGCTAAACAGATTAGGGGCTTTTGAAGAACTAAAGCCAGATGTTGTTATTTA  
TGATATTTTAGGGGATGTTGTTTGTGGTGGTTTTGCAATGCCTTTACAAAACACTTAGCAGATGATGTTTAT  
ATTGTAACAACCTGCGACCCAATGGCAATCTATGCGGCAAACAATATATGTAAGGGGATAAAGAGGTATGCAA  
GTAGGGGAAAGATTGCATTAGGGGGGATTATTTACAATGGGAGGAGTGTTATAGATGCTCCAGAAATTGTAAA  
AGATTTTGCCAAAAAAATGGAACCTCAAGTTATTGGAAAAATCCCAATGAGCAACATTTATACAAGAGCAGAG  
ATTTACAAAAAGACAGTTATTGAATATGCTCCAGACAGTGAGATAGCAAATACATTCAGAGAGATTGCAAAGG  
CAATTTATGAAAATGAAAATAGAGTTATTCCAATCCGTTATCAGAGGAGGAATTGGATGAGATTACAGAAAA  
AATCGATGTTCTTTTAAAAAGAGAGTGTTAAAGGATAA

>mfe\_Mefer\_1138-Ar

ATGAGAAAATTTCTGTGTCTATGGAAAGGGAGGATTGGAAAATCAACAACCTGTAAGTAATATAGCAGCAGCTT  
TAGCAGAAGAAGGAAAAAAGGTTTTAGTTGTTGGCTGTGATCCAAAGGCAGATACAACAAGGAATTTAGTTGG  
AAGAAAGATTCCAACGGTTTTAGATGTTTTTAGGAAAAAAGGAGCAGACAATATGGAGTTAGGGGATATAGTT  
TTTGAAGGTTTTGGAGGAGTTTATTGTGTTGAAAGTGGAGGACCTGAGCCAGGAGTAGGATGTGCTGGGAGGG

GAGTTATTACAGCGGTTGATATGTTAAATAGGTTGGGAGCTTTTGAAGCATTAAATCCAGATGTCGTTATTTA  
TGATATATTGGGAGATGTGGTTTGTGGAGGATTTGCAATGCCCTTACAGAAGCACTTGGCTGATGATGTTTAT  
ATCGTAACAACCTGCGATCCAATGGCAATTTACGCAGCAAACAATATATGCAAAGGAATAAAGAGGTATGCAA  
GTAGAGGAAAAATTGGGTGGGAGGGATTATTTACAATGGAAGGAGTGTATAAACGCTCCAGAAATTGTTGA  
GGTCTTTGCTAAAAAATAGGAACTCAAGTTATTGGAAGGATCCAATGAGTAATCTTATAACAAAGGCAGAG  
ATTTATAGAAAGACAGTTATTGAATATGCTCCAGATAGTGAAATAGCAGATAGATTTAGAGAATTGGCAATTG  
CAATCTATAAAAATGAAAATAGGGTTATTCCAAATCCGTTATTAGAGGATGAGTTGGATAAGATTACTGAAAA  
AATTGACGACCTTTTAAAAGAAAGTGTAAAGAATAA

>mvu\_Metvu\_0884-Ar

ATGAGAAAATTTTGTATTTATGGGAAAGGAGGTATTGAAAATCCACAACCTGTGAGTAATATAGCAGCAGCGT  
TGGCAGAAGATAAAAAAGAAGTCTTGGTTATTGGTTGTGATCCCAAGGCAGATAACAAGAAATTTAGTTGG  
GAAAAAATTTCCAACGGTTTATAGATGTTTTTAGAAAAAAGGAGCAGAAAATATAACATTAGAGGATATTATC  
TTTCAGGGCTTTGGAGGCGTTTATTGTGTTGAAAGTGGAGGACCTGAGCCAGGAGTCGGGTGTGCTGGAAGGG  
GAGTTATTACCGCAGTAGATATATTAATAAATTAGATGCATTTGAAATAATAAATCCAGATGTTGTGATTTA  
TGATATTTTGGGAGATGTTGTATGCGGAGGATTTGCAATGCCCTTACAGAAACACTTAGCCGATGATGTTTAT  
ATTGTAACAACATGCGATCCAATGGCAATATACGCGCTAATAATATATGCAAAGGAATAAGAAGATATGCGA  
ATAGAGGAAAAATAGCATTAGGAGGAATTTTACAATGGAAGAAGTGTATAGATGCCCTGAGATCGTTGA  
GAATTTTGTGAAAAAATCGGAACCAAGTTATTGAAAAATACCAATGAGCGATCTTATCACAAGAGCAGAG  
ATCTATAAAAAGACCGTTATTGAATACGCTCCCGATAGTGAAGTTCAGAGAATTTTAGGAACTCGCAAATG  
CAATTTATAAAAATAAAAATAGAATTATTCCAAATCCACTAACAGAAGAAGATTAGATAAAATTTCTGAAAA  
GATCGACAGTTTAATAAAGCAAACTTATAA

>mvo\_Mvol\_0700-Ar

ATGAGGAAATTTTGTATATATGGTAAAGGAGGGATTGAAAATCCACAATGTTCGGTAATATGGCAGCAGCTT  
TGGCAGAAGATGGTAAGAAAGTTTTAGTTGTAGGTTGTGACCCAAAAGCCGACTCAACAAGAACTTTAATGCA  
CGGCAAGATTAATACTGTTTTAGATACATTCCGTGATAAAGGACCAGAATATATGAAAATGAAAGATATTGTT  
TACGAGGGTTTTAATGGCGTTTACTGTGTAGAGAGCGGTGGTCCAGAGCCTGGTGTGGGCTGTGCAGGGCGTG  
GAGTAATAACCGCAGTTGATATGTTAGATAGATTGGGTGTTTATGACGAACTAAAACCTGATGTAGTTATGTA  
CGATATATTGGGGGACGTCGTTTGCGGTGGTTTTGCTATGCCACTTCAAAGAGACTCGCAGAAGACGTATAT  
ATCGTAACCACTTGCACCCGATGGCAATTTATGCAGCAAACAACATATGTAAAGGTATACAAAGATACGGCA  
ATAGGGGTAAAATAGCACTCGGTGGTATTATATACAATGGTAGGAGCGTTGTAGATGAGCCTGAAATTTATCGA  
TAAGTTTGTACAAGGCATAAATACGCAAGTAATGGGTAAAATACCTATGAGTAATATAATCCTAAAGCAGAG  
CTTAGGAAACAGACAACAATTGAATATGCGCCAGATTCCGAAATGCGAATAAATTTAGAGAACTTGCGAATG  
CAATTTATGAGAACAACAAAAAACCACAATACCGACCCATTAAGTGAGCAAGGTCTTGACGACTTAACAGAAAG  
TATTGAAGAATTAGTTAGAAAAAATATGAATAA

>msi\_Msm\_1707-Ar

ATGATTA AAAAGATAGCTATTTATGGAAAAGGCGGAATTTGGAAAAGTACAACAGTAGCTAATTTATCTGCAG  
TTTATGCAAATAATGATTTAAACTGTTTGGTTATTGGATGTGATCCGAAAGCTGATACAACACGTACATTGTG  
CGGTAGAAGAATCCCAGACTTGTAGATACACTTAAAAATAACAGAAAACCCAGTGAAGAGGATATTATTGTA  
AAAGGATACAATGATATTTATGTGTTGAAAGCGGAGGTCCGTAACCGGGTGTGGCTGTGCCGGACGTGGTG  
TAATAGTAGCTATGAAAAGACTTAAAACTTAGGTGTTTTGATAAGGATTTGGATGTAGTCATTTATGATGT  
ACTTGGAGATGTTGTTTGCAGGAGGTTTTTTCAGTGCCCTTACGTGAAAAGTATGCTGATGAAGTAATAATTGTA  
ACTTCCGGAGAATACATGTCATTATATGCGGCTAATAATATTGTTAAAGGAATTA AAAA ACTTAAAGGAAATT  
TAAGCGGAATAATCTGCAACTGCAGAAATGTTGACCATGAAAAGGAAATTTGTCAGCGAATTTGCATCAAAGAT  
AGGAACTCGTATTATTGGAAC TATTAATAGAAGCAATTTAATTCAGGAAAGTGAATTAGATGCAAAAACCGTT  
GTAGAAAAATACCCTGAATCTAAGGAAGCTAGTGAATATGAATCCTTAGCTACAAATATATGGAGAATAAAG  
TTTTACAACACCGGAACCTATGGATGATGAGGAATTTGAAAATTTTTCAAATCATTTTTAGAATAA

>mst\_Msp\_1120-Ar

ATGGTTTTTAAAAAATAGCAATATATGGTAAGGGTGGAAATAGGAAAATCAACAACAGTATCAAATATGGCTG  
CAGCATATGATAATCAACATTTGTTATTGGCTGTGATCCTAAGGCTGATACTACAAGAACATTTGGTAGGTAA  
ACGTATACCAACAATACTTGATACAATGAGAGATAATACTCAACCTGAACTTGAAGATATTGTATATGAAGGA  
TATAATAATACTTTATGTGTAGAATCTGGTGGACCTGAACCAGGAGTAGGTTGTGCTGGTAGGGGTGTAATTG  
TTGCAATGAACCTACTTGATAAAATTTGGTGCATTTGATAATGATCCTGATTTAGTAATATATGATGTTTTAGG  
TGATGTTGTATGTGGTGGTTTTAGTGTACCATTACGTGAGGATTATGCTGATGAAGTATATATTGTAAC TAGT  
GGAGAATACATGTCATTATATGCTGCAAATAATATTGCTAAGGGAATTAAGAAATTAATGGTAACTTGGTG

GTATTATTTGTAAGTGTAGGAATGTGAAAAATGAGGTGGAAGTGGTTACAGAGTTTGCATCACTTATTTCAAG  
TAAGATTATGGGTATAATGCCAGATGTGAACTTGTTCAGACAAGTGAATATAAGGCAAGTACAGTTGTTGAA  
ACTTTCCCTGATTCTAGTCAGTCAAAAATCTATTCTGAACTTATAAACAATATTATGAATAATCAGGAATTTT  
CTACACCAACACCTATGGGTATTGAGGAATTTGAAGAGTTCTTCTATTTCATATGTTTAA

>mru\_mru\_1466-Ar

ATGAAAAGACAGAAAAAATAGCTATCTATGGAAAAGGTGGTATAGGTAAAAGTACTACAGTAGCTAATATTG  
CAGCAGCTTACAGTGAAGACAATAAGAAAGTCATGGTTATTGGCTGCGATCCCAAGTCAGATAACAAGAAC  
ATTATGCGGTAAGAGAATACCTACCATAGTTTCATACCTTAAAGGACAATAAGAAGCCAGAGCTTGACGATTTG  
GTTTTCGAAGGATTTAATAAAATCAAATGTGTTGAAAGCGGAGGGCCAGAGCCGGGGGTAGGCTGTGCAGGTC  
GTGGTGTCAATTGTTGCTATGAAACGTTTGGAGAAGCTTAAATGCCTTTGAAGAGGAATTTGATGTAATCTTATA  
TGATGTTCTTGGAGATGTGGTCTGCGGAGGATTTTCAGTTCCTTAAGGGAGGATTATGCTGATGAGGTCTTT  
ATAGTATCCTCTGGAGAGTATATGTCATTATATGCTGCAAATAATATATCAAGAGGAATTAaaaaactaaaag  
GAAATCTTGGAGGCATTATCTGTAAGTCAAGGATAGACAATGAGGAAGAGATTGTTAATCTTTTGCAAA  
GGAGATTGGCACTCAAGTATTGGAGTATTGGCAGAAGCAATCTCATTCAAAGGAGCGAGTTGGATGCAAAG  
ACTGTAGTTGAGTATGCTCCTGAATCAATAGAGTCTGATGCTTATAGAAAGCTTGCAAAGGACATTTTTGATA  
ATGATAATTATTCAACTCCACAGCCGATGGAAGATGAAGACTTCGAGAATTTCTTTAAATCATTTATTGATTA  
A

>mfv\_Mfer\_0380-Ar

TTGAAAAAAGGAAACAACGTAGAATAGCAATATATGGAAAAGGAGGGATTGGAAAATCAACCATAGTTTCAA  
ACATTGCAGCTGCATATTCTGATAAGTATAAAGTTTTAGTAATTGGTTGTGATCCAAAATCTGATACAACACG  
GACATTGTATGGCTCCAGGATACCCACTGTACTACATATTTTAAAGGAAAAGAAAAGAACCAAAAGTTGAAGAT  
GTAGTGTATGTAGGATATAATGGTGTAAATGTGTTGAATCTGGGGTCCAGAACCCTGGTGTGGTTGTGCAG  
GTAGAGGAGTAATTGTAGCTATGAATTTACTTGAAAACTCGGGTATTTAGGGAATCTTTAGACATAATAAT  
ATATGATGTACTTGGAGATGTTGTTTGTGGAGGATTTGCTGTACCTTTACGTGAAGATTATGCAGATGAAGTT  
TATATAGTCACTTCGGGCGAATATATGTCATTATATGCCGCAAACAACATATGTAAAGGTATCAAAAGATTAA  
AAGGAAGACTTGGCGGTATCATTGTAATTGTAGAGGTATAAAGAATGAAGTAGAAATTTGTTGAAAAATTTGC  
AAAAAATAGGTAGTAAAGTTGTAGGTGTAATTCCTAGAAGTATTTAGTCCAAAAAGTGAATAGAAGGA  
AAACTGTAATCGAAAAGTTTCCAAAATCTGAACAAGCAAAAATATATAGAGATCTAGCGAAATCAATATATT  
TAAATAAAGATTTCTGTTGAACCAAAACCTATGAGTATAGACGAGTTAGAAAAATTTATTAAAAATCTATATAA  
TGTCTCATAG

>mel\_Metbo\_2093-Ar

ATGAGTAAAACCAAAAAATCGCTATTTATGGGAAGGGAGGGATTGGTAAATCCACCACAGTATCCAACATAG  
CTGCTGCCCGGTCCAAGGACAGTGAAGTTCTGGTAATAGGTTGTGATCCTAAAGCAGACACTACTAGAACCCT  
TGTTGGAAGAAGAATCCCAACTATATTAGATATTTTAAAGCTTAAAAAGAAGGATCTAAATCAAGAAGACATA  
ATAGTAAAGGGCTTTGGTGATGTGAAATGTGTAGAGTCTGGAGGACCTGAACCTGGAGTGGGATGTGCTGGAA  
GAGGAGTCATAGTAGCTATGAACCTCCTGGAACGTCTAGGTGTTTTCAAAGAAAACCTGGACCTCATCATCTA  
CGACGTGCTTGGAGACGTGGTATGCGGAGGATTTGCAGTTCCTCCGTGAAAACTTCGCAGATGAAGTTTAC  
ATAGTCACCTCAGGTGAATACATGTCTCTGTATGCTGCAAACAACATCTGCAAAGGAATAAAAAACTCAAAG  
GCAATCTTGGAGGCATAATCTGCAACTGTGCGGGAATTGAGAATGAACTCGAAATTTGTTGGAAGAATTTGCAA  
AATTGTCAACACCAAGATCATAGGAGTAATGCCCCGTAACGAACTGGTTCAAAGGCAGAGATCGAAGCAAAA  
ACAGTGATAGAAAAGTTCCAGATTCTGAACAGGCTGAGCTTTACATAGAAGTGGGAGAAAACATCTACAACA  
ACCAGAAATTTGACATTCCAAACCCATGGAAGTGGATGATTTTGA AAAATTTCTTCAGAAAAGTTTCACTAG

>mew\_MSAN\_0543-Ar

ATGAGTAAAGACCAACGAATAGCTATCTATGGAAAAGGGGGAATTGGAAAATCCACCATTTGTCTCCAACATAG  
CAGCAGCATACTCTGAAAACTGCAACGTGCTGGTTATAGGCTGCGACCCCAAGGCGGACCACTAGAACCCCT  
GGTGGGAAGCAGGATACCAACCATCCTTGAATTTGTGAAGCGTAAAAAGGGGCATCACCTGATGAAATCCTT  
TTTAAAGGCTACGGTGGTGTGAGATGCGTGGAAAGTGGGGGCCCGAACCTGGAGTTGGATGTGCAGGTGCTG  
GTGTTATAGTGGCCATGAACCTCCTTGAAGAAGCTTGAATATTTCTCAGAAGACCTCGACGTTATCATCTATGA  
TGTAATCTGGGGAGTACATGGCATTATACGCGGCTAACAAACATCTGTAAAGGTATAAAAAAGCTTAAAGTC  
GTTTTGGTGGTGTCAATGCAATCGCAGAGGACTCAAAGATGAAGTAAAAATAGTAGGGGAATTTGCTGAGCG  
GGTTGGAAGCAAGATCATTTGGAGTCATACCAAAAAGCGAGCTGGTCCAGAAGAGTGAGTATGAGGCCAAAAC  
GTTGTTGAAAAATTTCTGATTTCTAAGCAAAGTGAAGTCTACAGAAAAGTTCGAAAAGCCATATATCTAAATG  
AAGATTTTGTAGTTCTGAACCTATGGGTATAGATGAATTTGAAGAGTTTTTTCAGGCAATTTTTAA

>mmg\_MTBMA\_c10230-Ar

ATGAAGAGGATAGCGATCTACGGTAAGGGTGGTATAGGGAAGTCCACAATCGTATCGAATATGGCCGCAGCCT  
ATTCCTCTCATCACAGGGTACTCGTCATAGGCTGTGATCCAAAGGCGGATACAACCAGGACACTCTACGGTGA  
AAGGCTCCCCCGAGTACTTGATGTCCTCAGGGAGAACCCTAAACCTGACGCCTCTGAGGTTATCCATGAGGGT  
TTTGGCGGTGTTAGGTGTGTGGAGTCAGGGGGGCCTGAACCCGGTGTGGATGTGCCGGGAGGGGGGTGATCG  
TTGCAATGAACCTCCTTGAAAACTTGGTGTATTTCGAGGAGGAAATTGATGTCATCATATACGATGTCCTCGG  
TGATGTGGTCTGTGGGGGATTTCGCGGTGCCACTCCGTGAGGAATTTGCAGATGAGGCTATATAGTAACCTCC  
GGGGAGTACATGTCCCTTTACGCTGCAAACAATATTGCAAGGGGTATAAGGAACTGAGGGGTAAACTTGGGG  
GTGTCATCTGTAACCTGCCGTGGCATCAGAAATGAGGTTGATATTGTATCTGAATTCGCCTCAAGGATAGGTTT  
ACGTGTTATTGGTGTGGTCCCAAGAAGCTCCCTTGTTCAGGAGAGTGAAATTGAGGCGAAAACCCTGATTGAG  
AGCTTCCCTGAATCTGAACAGGCAGAGGTTTACAGGAACTGGCAGATGAGGTTTACCTTAACACGGAATTCC  
TGGTACCTGAACCCATGGACCCTGAGGAGTTTGGAGAGTTCTTCAGAAAATTCAGGGGAGATGATTGA

>meth\_MTH643-Ar

ATGAAGAGGATAGCCATCTATGGTAAGGGAGGTATAGGTAAATCCACCATCGTCTCAAACATGGCAGCGGCTT  
ATTCATCGGAGCACAGGGTCCCTTGTGATAGGCTGTGACCCCAAGGCAGATACCACAAGGACACTCTATGGTGA  
GAGGCTCCCCACGGTTCTGGATGTGCTGAAGGAGAACAGAGAACCCGATGTTTCTGAGGTAATACACACAGGA  
TTTGGGGGTGTAAGGTGCGTTGAATCAGGGGGCCCTGAACCAGGTGTGGGGTGTGCCGGGAGGGGGCGTCATAG  
TTGCAATGAACCTCCTTGAAAAGGCTTGGAGTATTTCAGGGAGGACATTGATGTCGTTATCTATGATGTCCTTGG  
TGACGTTGTCTGCGGAGGCTTCGCAGTTCCCTGAGGGAGGACTTTGCAGATGAGGCTTACATAGTTACATCC  
GGTGTGATACATGTCCCTTTACGCAGCCAACAACATTGCACGGGGCATAAGGAAGCTCAAGGGTAAACTTGGAG  
GTGTCATATGTAACCTGCAGGGGCATCAGGGATGAGGTGAAAATCGTATCTGAATTTGCTTCAAGGATAGGTTT  
AAGGCTGATTGGAGCTGTGCCAGAAGCAATCTTGTCCAGGAGAGTGAGCTTGAGGCCAGGACTGTTCATAGAA  
CGGTTCCCTGAGTCTGAACAGGCCTCTGTTTACAGGAACTTGCAGGAGGATATCTACAGGAACACTGAATTCA  
CGGTACCCGAACCAATGGATCAGGAGGAGTTTGGAGAAATCTTCAGAAAATTCAGGGTTGAGGGTTAA

>mbn\_Mboo\_2008-Ar

ATGGCAAAACAGAGAAAACATTGCGATATATGGAAAAGGCGGCATCGGAAAGTCCACCACCTCGTCCAATATCA  
GTGCCGCACTCTCGGAACTTGGCCTCAAAGTGATGCAGATCGGATGTGATCCCAAGAGCGATTCAACAAACAC  
GCTCCGGGGAGGCCGGTTTCATCCCGACAGTTCTGGATTCCCTGAGAAGCGGAAAGAGGGTTGAGACAAGTGAC  
ATTATCCACGAAGGATTCATGGTGTCTCTGCGTTGAAGCCGGGGCCCTGAGCCCCGGCGTCCGGCTGTGCCG  
GCCGCGGCATCATCACCGCAATTGAACTCCTCCGCCAGCGGAAGGTCTTTGAAGAGTTCAAACCGGATGTCTGT  
TATTTACGATGTCCTTGGGGATGTGGTCTGCGGGGGATTTGGTATACCCATCCGTGAAGGCGTGGCCGAACAG  
GTCTACACCGTGAGTTTCGTCCGACTTCATGGCGATTTATGCGGCAAACAATCTCTTCAAAGGCATCAAGAAGT  
ATGCGAACAGCGGGGGAGCATTGTTCTCCGGTATCATAGCAAATTCACAAACCTGCCTGTACAGCGCGAGAT  
TGTCGAGGACTTTGCCGCTTCCACAAAGACAACACTATTGCAGAATATGTTCCCGTTTCGCTTACCCTAACAAA  
AGTGAGCTCCAGGGAAAAGACTGTGATAGAGGCGGCTCCGGAGTCGGAGCAGGCCGAGGTTTACCCTGTCTTGT  
CAAAGAAGATCCTCAGTAATCAGGACCGGTATGTCCCGGCTCCGCTGGATACCGACCAGCTCAAAGACTGGGC  
CGAGAGCTGGTCTGACAAACTGCTCGAGCAGCGGACTCCCCGACCCATGTGAAGTGTGAACTCGAATGCATT  
GTCCCCGGCGCAGAGCCAATTATTGCAAAACCCCGATCCCAGCGATCTCCTGCAGTAAAAGCGGCCACTCCCC  
GGAGAACTGCCAAAGCAAAAGGATGA

>mpl\_Mpal\_0095-Ar

ATGACAGCATCACGTAATATTGCCATTTATGGAAAAGGAGGTATAGGAAAGTGCACGACCTCATCAAATCTCT  
CTGCAGCCCTCTCTGAACTGGGCCTCACTGTTCATGCAGATCGGGTGCATCCCAAGGCCGACTCGACCAACAA  
CTCCGTTGGCGGGGAGTCGATCCCCCTCGGTGCTGGACGCCCTGCGAAGTGGAAAGAAGATCGAGATCGGAGAT  
ATCGTCTTCAAAGGATTCATGGGGTTCTCTGTGTGTCGAGGCCGGCGGGCCCGAGCCCCGAGTCCGGCTGCGCAG  
GCCGGGAATCATCACGGCCATCGAATGCTGAAACAGAAGAAGGTCTTTGAGGAGTTCTCCCCTGATATCGT  
GCTGTACGATGTGCTCGGCGATGTGGTCTGCGGTGGTTTCTCTGTCCCGATCCGGGAAGGAGTGGCAGAGCAG  
GTCTATACCGTCCGCTCTTCCGACTTCATGGCTCTCTATGCCGCCAATAATCTCTTCAAAGGGATCAAGAAGT  
ATGCGAACAATGGTGGAGCTCTCTCAGCGGGATCATCGAAACTCGATGAGCAAGCCGGTCCAGCGGGAGAT  
CATCGATGATTTCCCGTTTCATACGTCGACGACCGTTCGAGGCTACGTGGAGCGATCTCTGGCCGTGACCAGG  
AGTGAACCTCCGGGGGCGAGCGGTTCATCGAACGGGATCCTGACTCCCCCAGGCCGATGTCTATCGAAGGCTTG  
CGAAGGGGATTGTGAGAAATCAGAAGCGGTATGTTCCCGCTCCGCTCGATGCCGAAGAAGCTCAAAAAGTGGGC  
TTCCAGCTGGTCTGATCGGATCATCGGGCAGGACGCTGACGAGGAGGCCCCCAAGAGCACATCATATCCACCA  
GCAGGGAGTGAGGGACTCAGTTAA

>mel\_Metbo\_1180-Ar

ATGAGTAAACGAAAACAAATTGCAATTTATGGAAAAGGCGGGATTGGGAAGTCGACTACAACCTCCAACCTAA  
GTGCGGCCCTGTCAGATTTAGGTTACAGTGTAAATGCAGATAGGATGTGACCCTAAAAACGATTCAACAACCAC  
ACTCAGGAAAGGAAAACCAATACCTACCGTTATGGATACAGTAAGAAGTGGCTCCAACAACTGGATAATTTA  
ATATTTGAAGGTTACAATGGGGTTCATTGTGTTGAAGCAGGAGGTCCTGAACCTGGTGTGGATGTGCTGGAC  
GAGGTATCATTGCAGCCATCGAATTGCTAGACAACAATGGAATAATTGACGACATCGACCCAGATATCGTTAT  
ATACGATGTTTTAGGAGATGTTGTTTGTGGTGGATTTGCAATCCCTATCAGGCAGGGAATTGCAGAACAAGTG  
TACACAGTTACATCCTCCGATTACATGGCAATTTACGCCGTAACAACCTCTTCAAAGGAATTCTTAAATATT  
CCGGTAGTGGAGGAGCTTTACTTGGAGGAATAATTGAAAATCCATCTCAAAAATATCACAAAAGGAAATGAT  
AACAGATTTTCAGCGAGAAAACGAAACCAATGTTATAGAATTTGTTCCAAGATCATCCACTGTAATAATGC  
GAATTAGATGGTGTCAACCATTGAAGGTGCACCAAAATTCAGAGCAGGCTGAAGTTTACAGGCAACTTGCAA  
GGAACGTAATAACAACAAGATTCCTACATTCAAAACCAATTTGAAGCTCAAGATCTTGCAGATTGGGCTGC  
TTCATGGATTAACAATCTTCTTAAAGAAGAAAAGATCGAACAGAACGGTATTTCGAAGCGGTAGTGGAGAAGGA  
ATTTAA

>mew\_MSUN\_1020-Ar

ATGACGAAAAGGAAGCAAAATGCAATATATGGAAAAGGCGGTATTGGAAAGTCCACAACAACCTCCAATTTAA  
GTGCGGCCCTTTTCAGATATTGGTTACAGTGTAAATGCAGATCGGCTGTGACCCGAAGAATGATTCAACAACCAC  
ATTACACAAGGGAAAAGCAATACCCACAGTTCTTGATACGGTCAGGAGTCGTTCAAACGATTTTGATAAGGTT  
ATACATGAAGGTTACAATGGAGTGCAGTGTGTCGAAGCTGGAGGTCCAGAGCCAGGTGTGGGCTGTGCTGGTC  
GTGGTATTATTGCGGCCATTGAACCTCTGGATACAAACGGTATAATTGACGATTACGACCCGGACATTGTTAT  
TTACGATGTGCTGGGTGATGTTGTATGCGGTGGATTTGCCATTCCAATCAGACAGGGAATTGCAGAACAGGTT  
TACACAGTAACATCTTCTGATTACATGGCAATTTATGCTGTTAACAATCTTTTTAAGGGAATATTTAAATATT  
CTGGAAGTGGTGGGGCTTTATTAGGTGGAATTTATTGTTAACTCCATCAAGAGGATAGCTCAAAAAGACATGAT  
AGATGATTTTCAGTGATAAAACAGGTACAAATGTAATTGAATACATTCGAAGGTCTTCAACTGTCACTCAATGT  
GAGCTCGATGGTGTGACCACAATTGAAGGTGCTCCTGATTCACAACAGGCTCAGATTTACAGAGATCTGGCTC  
AAAAAATTGTAGACAACAACAGAAATATATTCCTAAACCATTTGATGCAGATGATCTATCTGATTGGGCTTC  
AACATGGATTAATCGTATACTTACTGAAGAAAAGGTAAGTTCAAGGGGAATACAGAAAAGAGGGGGCGGTGTT  
TAA

>mhu\_Mhun\_0793-Ar

ATGAAACAGATCGCTCTCTATGGCAAGGGAGGTATCGGTAAATCCACCACATCAGCAAAATCTTCCGCAGCCC  
TGGTAAACCGTGGTCTTTTCAGTTATGCAGATTGGGTGTGATCCGAAACGTGATAGTACCCGGATGCTTATGAA  
AGGGATACTTATCCCAGCGGTGTTGGATCTTATCCGTGAACGTGGTGAAGAGAACCTTACCCTTGATGATGTT  
GTATTCACCCGATATAAGGGGGTTCGGTGCCTGGAGGCAGGAGGACCAGAACCTGGTGTGGATGTGCAGGCA  
GAGGCATTATTGCGACTTTTCAACTTCTTGAACGACTTTTCAGCATTGATGAAGACATAATTGTGTATGATGT  
TCTGGGCGACGTTGTCTGTGGCGGGTTTTGCTATGCCATGCGAAAAGGATATGCACAGGAAATATATCTTGTCT  
ACCTCCGGAGAACTCATGTCTCTCTATGCTGCAAAATAATATGTAAGGCAATCTCCCGGATATCTCAAAATG  
TCAGACAGGTCTGCAGACTTGGAGGAGTTATCTGTAACAGCAGAAATCTTCCAGATGAAGAGAACTGGTGGG  
AGCATTGTCATCTGAAGTCGGTTCGAAGATAATCGCCTATATCCCAGGAGTGGCCTGGTACAGTATGCTGAA  
TTAAATAACCAGACAGTTATTGAATTTGCACCTGATTCATCACTCTCTGCAACATATCAATCCCTTGCCGAAG  
AAATAATGACGAATACAGATTTTCGTAATCCCCAAACCACTAGAGATTGAAGAACCTTGAAAACCTTGCCAGATC  
TTATCTTCCAACGATCGATCATCAGGGAATCAATCACTAA

>m1a\_Mlab\_1041-Ar

ATGAAAAAATTGCATTTTATGGTAAAGGCGGAATCGGAAAATCAACCTGTGTCTCAAAATATTTCTATGGCTC  
TCGCCGAGCAGGGATTACGGTTCATGCAGATCGGCTGCGATCCGAAAGCAGATTCAACGAGAAATCTAACTCA  
CGGAGATTTGATCCCATCTGTTCTCTCAGTAATAAGGGAGAAAAGAATGATATTTGTTGGAAGATATCGTT  
TCCTGTGGATCAGGTGGAGTATTGTGTGTAGAGGCGGGGGGCCAAAACCCGGGTGAGGTTGTGCAGGTGCGG  
GCATTATTACTGCTTTTGAACAATTGGAGGAGCTTGGAGCTTATACTACCTATCATCCAGATATTATTCTCTA  
TGATGTTTTAGGAGATGTGGTCTGTGGAGGATTTGCCCTGCCGATACGCCAAGGATATGCCGATGAGATCTGT  
ATTGTGACATCCGGCGAGATGATGTCCTTGTATGCCGCGGATAACATCTCTCAGGCGGTGAATAATTATTCAA  
AGCGTGGATATGCGGCATTTGAAGGGACTCATCTACAATGCAAAAATATTGAAAATGAAGATGAGATTGTGGA  
AAAAGCGGCTGCAGAAATGAATACAAAGGTGTTGTCCAGGATTAACCGTGACCCGATTTGCCAAAAGGCTGAA  
AATGCTGGTATGACTGTTGTGGAATATGCACCGAATTCATCTCAAGCAGATTTGTATAGAAAACCTAGCAGGAA  
TTTTACTTGGAGATTAA

>mac\_MA1633-Ar

ATGAGACAGATTGCGATCTACGGTAAAGGCGGAATAGGGAAGAGCACTATCTCCTCGAACCTATCTGCCGCAT  
TGCATGAGATGGGACATACGGTCATGCAGGTTGGCTGTGATCCCAAAGGGATTTCGACGCGGATCCTTGCAGA  
AGGAAAGTTTATTCTCGGGTCTGGAAGAACATCGGGAACAGTTAAGGATAGGAAAAGATGAGTATGCGATC  
AATCTGAAGAATATCGTCTTCAAGTACCCCGCGGGATCTACCTTGTGAAGCGGGGGACCGGAACCGGGTA  
TAGGGTGTGAGGCCGGGAGTCTGACAGCCCTGCAAATCTAAAAGACCTCAAGGCATTTTCTACCTACAA  
CATCGACGTGGCAATCTACGACGTGCTTGGCGATGTCGTCTGCGGAGGTTTCTCAATGCCGATCCGCGAAGGT  
TTCGACAGAGATCTATCTCATCTGTTCCGAGGGTTCATGAGCATCTATGCAGCAAACAATATTGCTCGGG  
CCGTGCAGCGCCTCGAAAACGTGGGGATGCCGGTCTTGCCGGAATAATCTGCAATAGCAACGGAGATGAGGC  
TTTCGAGCATGCGTTTCAATCTGCATTTGCAAAAAGACTGGGGACCCCGTTTGTCCAGTTCGTCCCCCGGAGT  
CCGGTGTATCCAGGCATGTGAACGAGGGAGGCCTGTAGTAGAGTATGCTCCCGACTCTCAGGAGGCGGAAA  
TTTTCCGGAATCTTGCAAAAGCGATCATAGAAAACGATTCGCGTGTATCCCTACGCCGATAAATGACCTTGC  
CGAGCTTGAGACGATGTACCGGCAATGTCTGGTAAAAGATAAGAAATA

>mpd\_MCP\_0905-Ar

ATGAGACAGATAGCGATCTATGGTGAGGGAGGCATCGGGAAGAGCACGATCGCCTCGAACCTGTCCGCCGCC  
TTAACGAAATGGGTTACACCGTCATGCAGGTCGGCTGCGACCCCAAGAGGGATTCCACCAGGAACCTGGCGGG  
CGGACGCCTGATCCCCGCTGTCTTGAACATAACAGGGACCAGCTAAGGGTAGGCAAAGATGAATATGCGATC  
TCATTAGATAGCATCGTTTTCAAGTCTCCCGCGGCATCTACTGTGTCGAGGCCGGAGGGCCTGAGCCGGGCA  
TAGGCTGTGCCGGCAGGGGCGTATTGACAGCCCTGCAGATATTAAGGATTTGAAAGCCTTCGAAACCTACAA  
GATCGACGTGGCCATCTACGATGTCCTGGGCGATGTCGTCTGCGGCGGGTTTGCCATGCCCATCAGGGAAGGT  
TTCGCAAAGGAGATATACCTGGTCTGTTGAGGCGGTTTCATGAGTATCTATGCGGCGAATAATATCGCCCCTG  
CTGTACAGCGCCTGTACAGTAGAGCTGAAGCCGGGACAGGGCTTGCCGGTATTATTTGTAACAGCAACGGCGA  
CGAAACGCTTGAGCACTCGGTCATACCAGAATTCGCCCCGGCTCTCGGGAGCGAGTTTGTCCAGTTCGTTCCA  
AGGACCCCGGTGATCCAGGCCTGCGAGTTCGAGGGAAGAGCTGTGCTGGAGCATTCCCTAACTCTAAGGAGG  
CGGGGATATTAGAGATTTAGCTAAACAGATCATGGAATAAAAAGACGGTAGTTCCGACGCCGATTAATGA  
TTTAACCGAGCTCGAGCAGATGTACAGGCAGCATCTCAATAAAAAGTAA

>mem\_Memar\_1937-Ar

ATGAAACAGATCGCCCTCTACGGGAAGGGGGGAATCGGGAATCCACCCTGCGGCGAACCTGTCCGGCAGCAC  
TCGCGGGAGAAGGGCTCGATATCCTGCAGATCGGCTGCGATCCGAAGCACGACAGCACCCGCATGCTGATGCA  
CGGGACCTGGATCCCGACGGTCTCGATCTCATCCGGGAGCGCGGAGACGAGAAGATAACCGTCGACGACGTC  
GTCTACCGGGGCTTTTCGGGGCGTCCGCTGCGTGGAGGCCGGAGGGCCCGAGCCCGGGATCGGGTGCGCCGGCC  
GGGGGATCATCGCGACGTTCCAGCTCCTCGAACGCCTGAACGCCCTCAAGGGCGACGTGATCGTCTACGACGT  
CCTGGGTGACGTGCTGTCGGCGGGTTTTCGATGCCGATGCGCGAGGGGTACGCCAGGAGATCTACCTGGTC  
ACCTCCGGCGAGTTGATGTCCATCTACGCGGCAAACAACATCGAAAAGCCATTGCGCGGCTCTCGCGCCGGG  
TGCGGAGCAGGTGCACGCTCGGGGGCGTGTATCTGCAACGCAAAGAACATCGAAGGCGAGCGGGAACCTCGTTGA  
CGAGTTCGCCCGCCGGATCGGCTCCCGGCTCATCGCCTACATCCCCCGCTCGAGGATCGTCCAGGTTCGCGGAG  
CTGCAGAAACAGACGGTCTGTCGAATACGCCCCGAATCCGACCAGGCGGCGGTCTACCAGGAACTCGCGCGGA  
CGGTCTACGGAACGAGACGACGAGCATCCCCACACCTCTCGAGATGGATGAACTCGAATCCTTCGCCCTCGA  
ATTCGTCCAGGTTTGA

>mpl\_Mpal\_0237-Ar

ATGAAGCAGATTGCCCTGTACGGCAAGGGCGGTATCGGCAAGTCTACGACCTCGGCCAACCTCTCCGCAGCAC  
TCGCTGAGCAAGGGCTCGGTGTCTCCAGATCGGATGCGATCCCAAGCACGATAGTACCCGGATGCTGATGCA  
TGGCACCTGGATACCGACCGTGTCTGACCTGATTCGGGAACGCGGAGGGACCAACCTGACCATCGACGATGTA  
GTGTACACCGGATATCGGGGTATACGCTGCGTCAAGCCGGTGGACCTGAACCGGGGATCGGCTGCGCCGGCC  
GTGGGATCATCGCGACCTTCCAGGTGCTCGAGAACTCGAAGCATTCTCAGCCGACGTGGTCTGCTACGACGT  
CCTCGGGGATGTGGTCTGTGGCGGGTTTTCGATGCCGATGCGCGAGGGGTACGCCAGGAGATCTACCTGGTC  
ACCTCAGGCGAGTTGATGTCCCTGTACGCGCAACAACATCTGCAAGGCGATCAACCGGCTTTCCAGCGAC  
CGAAGTGTACCTGCCGGCTCGCAGGGGTGATCTGCAATGCCAAGAACATCGACCGGAGGAGGATCTGGTCAG  
GGAGTTCGCCGAACGGGTGCGCAGCAACCTGGTGCCTATATCCCCCGGACCGCATCGTGCAGCTGGCCGAG  
GTGCACAAGCAGACAGTGTGTAATATGCCCCGACTCAGCCCAGGCCGCAACGTACCGAACCTTGCAGAGG  
TGGTGTGACGAACACCACACTGACGATCCCCGAAACCTTTAGAGCTGGATGAACTCGAAGACCTCGCATTCAA  
GTACATATCGATATGA

>mbn\_Mboo\_2083-Ar

ATGAAGCAGATCGCCCTGTACGGAAAAGGCGGTATCGGAAAGTCCACGACTTCTGCGAACCTGTCTGCAGCCC  
TTTCCCTTTTCAGGGTACAACGTTCTCCAGATTGGTTGCGATCCCAAGCGGATAGTACCAGGATGCTGATGCA

GGGACGGTTGATTCTACAGTTATGGATCTGGTGC GCGAACGGGGAGCGGCATCAGTAACCCCGCGGATGTA  
GTCTATACCGGTTTTAATGGCATCCGCTGCGTTGAAGCCGGAGGGCCGGAACCTGGCGTTGGTTGCGCCGGGC  
GGGGGATTATCGCCACGTTCCAGCTGCTGGAAAAATTCGGTACGCTCACGGGAGATGTGATCGTGTACGATGT  
GCTGGGCGATGTGGTCTGTGGCGGGTTTTGCCATGCCGATGCGGGAAGGGTACGCCAGGAAGTGTACCTTGTA  
ACTTCGGGAGAACTTATGTCCCTGTATGCGGCAAACAACATCTGCAAGGCTGTACAGAGGCTGAGTGCCCCGCC  
CGAGGAGCATGTGCCGCTTGCCCGGGTTATCTGCAACGCCAAGAACCTGCCCGGGAAGAGGAGCTGGTGGC  
AGAGTTTGCCCCGCGGTCAACAGCCATCTTCTCCAGTATATCCCGCGTGATCGCACGGTCCAGCTGGCAGAA  
CTGGACC GCAAGACCGTGCTTGAGTACGAGCCGTCATCTGAACAGGCACAGAGGTACAGGGACCTTGCAGCCC  
GGTTATGGAAAACACGCGCTTACCATAACCCACCCCTTGAGATCGATGAGCTTGAATCACTTGCCCGCCA  
GTTCGTGTAG

>mpi\_Mpet\_2379-Ar

ATGAAGCAGATCGCCCTGTACGGAAAAGGCGGAATCGGAAAATCCACGACCTCGGCCAACCTTTCTGCCGCAC  
TTTCTGAAAAATCCCTCGAGATCCTCCAGATCGGATGCGATCCAAAGCATGACAGCACCCGTATGCTTATGCA  
CGGAGAATGGATACCCACGGTCTGGATCTTGTGAGGAAAGGAGAAGCAAATATCGCAGTCGACGAGATC  
GTTTTTAAGGGATATAACGGAATCAGGTGTGTAGAGCCGGCGGGCCGGAGCCTGGGATTGGATGTGCAGGAC  
GGGAATTATCGCAACATTCAGCTTCTTGAAAAGCTCAACGCACTCTACGGGGACGTAATCGTCTATGATGT  
CCTTGGCGATGTGCTATGCGGGGATTTGCGATGCCGATGAGGGAAGGCTACGCACAGGAGGTCTATCTTGTG  
ACATCCGGGGACTTCATGGCCCTTTATGCCGCGAACAACATCTGCAAGGCGATAGCCCGCTTTCGAAAAGGA  
CAAAGAACAGGTGCACGCTCGGGGGAGTCATCTGCAACTCTGCGAATATCGAAAACGAATATGAGCTGGTCAA  
AGAGTTTGCAGAAAAGATAAACTCAAAGCTCGTTGCCTATATCCCGAGGAGTCCGATCGTCAGGGTTTCGGAG  
GTCAACAGGAAGACAGTTATAGAGTATGCGCCTGAATCCGAACAGGCGGATATATACAGAAAACCTTGCCGATA  
CGATAATGGAAAATGTGCTGACAAGAACAGGATCCCTGTACCGATGGAGATGGATGAACTCGAATCGCTCTC  
TCTCAAATACATCAAGACATAA

>mac\_MA3627-Ar

TTGAAAAACAAAAGATCGTTGCAATTTACGGAAAAGGCGGCATAGGCAAGTCAAGTACAGCCTCAAACGTTG  
CAGCTGCCTGTGCGGAAGCAGGAAAGAAAGTCATGATCATAGGCTGTGACCCCAAAAAGCGATTTCGTCCATAAC  
CCTTCTCAGAGGCAAAAAGAAATCCCACAACTCCTCGATCTCCTCAGAGAGGGGTGGATGTACAGGAAAAGAT  
GTGGTTTTTTGAAGGGTATGCAGGGGTTAAATGCGTGGAAGCAGGAGGTCCCAGCCCCGGGATAGGCTGTGCAG  
GGCGCGGAATTATCGTTGCAATCCAGAACTCAAGAGCATTTCCGGAGATCTCCTTAAAGAGCAGGATCTCAT  
CATCTACGATGTGCCGGGAGACATCGTCTGCGGCGGCTTTGTTGCTCCTGTGAGGAAAGGTTACGTAATGAG  
GCCTATGTCCTGACCTCCGGAGAGTACATGCCCTCTATGCAGCAAATAACATCTGCAAAGGGCTTTCCAAGA  
TCGGGATGCCGCTTAGCGGGGTTATCTGCAACTCGAGGAATGCAAGCCGGGAAGAGGAAATCGTCAGGAAGTT  
TTCCGAAGAAATCGGAAGCCAGCTGATGGCTTTTCATCCCGAAGCGGCAGATAGTGCAGGACTGCGAAAGAGAA  
GGGTATTCGGTTATGGAAAAAGCTCCGGACTCCGACATTTGCCGAAGTCTACCGCCAGCTCGGAAAATCAATCC  
TTACAAACGAAAAGAAAGTTATGGCATCCCACCTGAGCGATGAGCGGTTAAGGGAAATGACAAAATAA

>mma\_MM\_0514-Ar

TTGAAAAACAAAAGATTATTGCAATTTACGGAAAAGGCGGCATAGGCAAGTTCGAGCACAGCTTCAAATGTTG  
CAGCCGCCTGTGCGGAAGAAGGCAAGAAAGTTATGATCATAGGCTGTGACCCCAAAAAGCGATTCTTCGATAAC  
CCTTCTCAGAGGGCGGAGAAATTCGACAATTTGACCTCCTCCGCGAAGGCGTGATGTTAAGGAAAAGAC  
ATTGTCTTTGAAGGGTATGCAGGCGTCAAATGCGTGGAAGCCGGAGGCCCGGAGCCTGGAATAGGCTGTGCAG  
GACGCGGAATTATAGTCGCAATCCAGAAATTAAGAGCGTCAACGGAGACCTTCTGAAAAGAACAGGACCTCAT  
AATCTACGATGTACCCGGGGATATCGTCTGCGGCGGGTTTGTGCCCCCTGTGAGGAAAGGCTTTGTAAACGAG  
GCTTATGTCCTGACCTCGGGAGAGTACATGCCCTTTATGCAGCAAACAATATCTGTAAGGGCTTTCCAATA  
TCGGGATGCCTCTCAGCGGAGTTATCTGCAACTCAAGAAAACGCAAGCAGGGAAGAGGAAATGTCAGAAAGTT  
TTCCGAAGAAATCGGCAGCCAGTTAATGGCTTTTCATTCCAAAGAGGCAGGCAGTACAGGACTGGGAGAGGGAA  
GGCTATTCGGTTATGGAGAAAAGCTCCTGACTCCGATATTTGCCGAAGTCTACCGCCAGCTTGAAAAGCAATCC  
TGAAAATGAAAAAAGGTTATGGCAGACCACCTGGGCGATGAGCGGCTGAGGGAAATGACAAAGTAA

>mba\_Mbar\_A0347-Ar

TTGAAAACCCAGAAGATCATAGCGATCTACGGAAAAGGGCGGCATAGGTAAATCGAGTACAGCTTCAAACGTTG  
CCGCTGCCTGCGCCGAGGCAGGAAAGAAGGTTATGATTATAGGCTGCGATCCTAAAAGTGA CT CATCAATCAC  
CCTTCTAAGAGGCAGGAGAAATCCAACCATTTCTGACCTCCTGCGTGAGGGTGTGGACATAAAGAAAGAAGAT  
GTGGTCTTTGAAGGATATGCAGGCGTCAAATGCGTGGAAGCAGGCGGCCAGAACAGGCATAGGTTGTGCAG  
GGCAGGAATCATTGTTGCCATCCAGAAATTAAGAGCATTTTCAGGAAATCTCTTAAAAGAGCAGGATTTGAT  
CATTTACGATGTGCCCGGAGACATAGTCTGCGGAGGGTTTGTGCCCCCTGTGAGGAAAGGATTTCGTAATGAA



GCTTATGTCCTGACCTCAGGAGAGTACATGCCCTTTATGCAGCAAATAATATATGCAAAGGCTTATCGAAGA  
TAGGAATGCCGCTTAGCGGGTAATCTGTAATTCAAGAAACGTGAGCAGGGAAGAGGAAATCGTTTCGAAGTT  
TTCTGAGGAGATCGGCAGCCAGCTTATGGCTTTTATCCCGAAGAGGCAGGTAGTTCAGGACTGTGAAAGAGAA  
GGTTACTCGGTAATGGAAAAAGCGCCTGAATCCGATATGCAGAGATCTACCGCAAACCTCGGAAAAGCAATCC  
TTGAAAACGAAAAACGAGTTACAGCCGATTCCCTTAGTGATGAACGGTTGAGGGAATTAACAAAATAA

>mbu\_Mbur\_1038-Ar

ATGAGCGTACAGAAAAGAATAGCTATCTATGGAAAAGGTGGCATCGGAAAATCCAGTACTGCATCCAACGTTG  
CAGCCGCATGTGCCGATGAGGGATACACGGTAATGATAATTGGCTGTGACCCGAAAAGCGATTTCATCCATCAC  
CCTTCTTGGAGGAAAACGCATCCCAGCATCCTTGATCTTCTGCGTAAGGAAAAGGATGTGAAAGAGGAAGAT  
GTCGTATTTACCGGTTACAATGGCGTGAAGTGTGTGGAAGTGGGCGGACCCGAGCCAGGTATCGGCTGTGCCG  
GACGTGGGATCATCGTGGCCATCCAGACACTTAAGAAGATATCAAAAACGCTGAACGAAATGGACCTTATCAT  
CTACGATGTCCCTGGAGATATCGTATGTGGTGGCTTTGTAGCACCTATACGCAAGGGACTTGTAAGGAAGCA  
TATGTCCTGACTTCCGGCGAATATATGCCCTTTATGCAGCGAACAATATCTGCCGAGGACTGGCAAAGATAA  
ACACTCCCCTCAGCGGGATCATATGTAATTTCCCGCAGTGTGAGCCGTGAAAAGAGATAGTGACCAAGTTCGC  
AAGTGAGATAGGAACCGACCTTATGGCGTTCATACCAAAGGAACAGATCGTGCAGGATTGCGAAAGGGATGGT  
TTCTCGGTTCATGGAAAAGCACCAGACTCCAGCATTGCACAAGTTTATCGTGACCTTGCGAAGGCCATCATGC  
AACGCGATACTTCCGTTATGCCTGTTGCTCTTGACGATGAACGTCTCAGAGAGCTTACCAGATAA

>mmh\_Mmah\_1413-Ar

ATGAATCCGCAGAAAAGAATGCAATCTATGGCAAAGGCGGTATCGGTAAATCAAGCACTGCATCCAATGTAG  
CCGCTGCCTGTGCCGATGAGGGCTATAATGTCATGATAATCGGATGTGACCCAAAAGCGATTTCATCCATAAC  
ACTCTTGGGAGGAAAACGTATCCCACACTATCCTGGACCTACTCAGAGAGGGCATGGAGATAGAAGAGGAAGGA  
GACGTTGTTTTTGGAGGATACAAGGCAGTGAATGTGTAGAGGTGGTGGACCTGAACCGGGCATCGGTTGTG  
CCGGCAGGGGGATTATTGTTGCCATCCAGAAACTCAAAAAGATATCCCAATCCATGAAAGAAATGGACCTTAT  
CATTATGATGTGCCCGGGATATTGTCTGTGGCGGATTTGTGCCCCGATCAGAAAAGGACTGGTCAATGAG  
GCCTATGTCCTCACCTCCGGGGAATACATGCCACTGTATGCAGCCAACAACATTTGCAAGGGACTGTCCCGTA  
TCAATACGAAACTTAGCGGTGTAATCTGTAACCTCACGCAGCGTCAGCCGGGAAAAGGAGATAGTGAGCAAATT  
TGCAAATGAGATCGGAAGTGAACCTGGTGGCCTTTATACCAAAGGAACAGATCGTGCAGGACTGCGAAAGGGAT  
GGTTATTCAGTGCTTGAAAAGGCAGGAGGCACAGATATTGCTGAAGTGTATCGCGCCCTTGCAAGAAATATAA  
TGAGCAGTGATTGTGCAGTTGACCCCCGGGCACTGACAGATGAGCGGCTCAGGGAACCTTACCCGGTAA

>mev\_Metev\_0555-Ar

ATGAACAATAAAACCAATGATAACAATCAGAAACAGAAACGAATAGCTTTGTATGGTAAAGGAGGCATCGGTA  
AATCGAGTACAGCATCAAAATGTTGCGGCTGCATGCGCTGATGAAGGATACAAAGTTATGATTATCGGATGTGA  
CCCAAAAAGTGATTTCGTCCATAACTTTGCTTGGTGGTAAAAGAATTCCTACAATACTTGATCTTTTGCCTGAT  
GGTGAGGGTTTTAAATGAAGAGGATGTTGTATTTGAGGGATACAACGGAGTTAAATGTGTAGAAGTTGGAGGTC  
CAGAACCCGGTATAGGTTGTGCAGGACGCGGAATTTGTTGCTATCAATCAGTTGAAAAGAATCTCAGATTC  
CATGAAAGAAATGGATCTTATAATCTATGATGTTCCCGGAGATATAGTGTGCGGGGGATTTGTGGCACC GGTA  
AGAAAGGGTATGGTGAATGAATCCTATATAATAACCTCAGGGGAATATATGCCGATGTATGCTGCAACAATA  
TATGCAGTGGTCTCTCAAAAATCAATACCCGTTAAATGGAATTGTATGTAATTCACGCGATGTCACAAATGA  
GAAAGAAATAGTAGAAGAAATTTGCTCATGAGATAGGAAGTGAACCTTCTGTCAATTCATCCCCAAAGAACAGATT  
GTCCAGGATTGTGAACGCGAGGGTTATTCTGTAATGGATATAGCACCCGATTCAAAGATTGCACAGGTTTATC  
GGAACTGGCACAAAAATAATGTCAAAAACAGAGCCAGATTCCGTTTTTACC GAATTCAATGGATGATGAACA  
GTTACGGGAACCTTGCAAGAAAGCAAAGCAAACAAGAAAACAAAATCATGTCAACAACAAAAAACGATAAGAACC  
GAATAA

>mzh\_Mzhil\_0468-Ar

ATGAAAAATAGGAAGATCATTGCAATTTATGGAAAAGGGCGGTATTGGAAAATCAAGTACCGCGTCCAATATTG  
CCGCAGCATGTGCAGATGAAGGATATAAAGTAATGATCATTTGGCTGTGATCCAAAGAGTGATTCTTCAATTA  
TCTGCTTGGTGGACAGCGAATTCCAACTATTATGGGGCTACTGCGTGAGAGCGTAGATATTCAGGAAGAAGAC  
ATTATTTTTGAAGGGTACAATGGAGTAAAGTGTGTTGAAGTTGGTGGTCTGAACCCGGTATTGGATGTGCAG  
GAAGAGGTATTATTGTTGCAATTCAAAACCTAAAAGTGTTCAAAGGCCATCAGGAAATGGATCTTATTAT  
TTATGATGTGCCTGGCGATATTGCTGTGGTGGGTTTGTAGCTCCTATCAAAAAGGGTTTGTAAACGAAGCA  
TATGTTTTGACATCAGGAGAATACATGCCACTTTATGCTGCAACAATATTTGCAGAGGACTGAATAAAAATAA  
ATACTCCTCTTAGCGGAGTCATCTGCAATTCCCGTGATGTAAGCCGTGAGAGGGGAAATGTTAAAAGTTTTC  
TGAAGAGCTTGGAAAGTGAACCTTATAGCTTTTATACCAAAGAGCAGATTGTACAGGACTGTGAGCGTGAAGGT

TTCTCTGTGATTGAGAAGGAACCGGACTCTAGTATTGCAGATGTTTACAGGGAACCTGCCAGAAAGATCATGT  
CACAGAAAAAGCTTCAAATCCAGACCCAATGGATGATGAAAAGTTGCGCAGCCTTACAAGGTGA

>mcj\_MCON\_0503-Ar

ATGTCATCTATTAACACGTTGCGATATATGGCAAAGGCGGTATCGGCAAGTCGTGCACTGCCTCGAACATCG  
CTGCTGCCTGTGCCGAGGAAGGCCACAAGGTTTTAATGGTGGGCTGCGATCCGAAGAGCGACTCAAGCATCAC  
CCTCATAGGAAGGAGAATGCCACGATGATGGACCTCATCCTCAAGGGAGGAGAGTTCAAAGAGGAGGATGTG  
GTCCATCAGGGCTTCCAGAGGAGTCAGGTGCATTGAGGTGGGCGGGCCGAGCCAGGCGTGGGATGCGCGGGAC  
GGGGCATAATCGTTGCCATTGATTTTTTTCGGAAGGTATCAAAGCGATGGAGGAGGTGGATCTGGTGCTCTA  
TGATGTGCCAGGGGACATCGTCTGCGGGGATTCTCCGCTCCCATCAGGAAAGGGCTGGTGAGCCAGGCCTAC  
ATCATAACCTCAGGGGAGTACATGCCCTTTTATGCGGCGAACAATATCAGCAAAGGCCTCCTGCGATTGAATA  
CCCCTCTTGAGGGGTGATATGCAACTCTGCGGAGGCAGCTGGAGAAAGAGAGCGCGAGATAGTCAACCAGTT  
TGCCCAGGAGCTGAACAGCCGGATGGTGGCCTTCATTCCCAAGGAGCCGATAGTCCAGCAGTCCGAGAGGAGG  
ACGGTACTGTGATCGAGGGCGCGCCGATTGCAAGATCGCCGCTGTCTACCGGGCCCTGGCAAGGGAGATCA  
TGTCCGGCGGAGAGGCCAGGATCCCTGAACCTCTTAGCGATGAGAGGCTGAGAGAGCTCTCCCGCATCTGGG  
CTCTGAGGAGTGA

>mtp\_Mthe\_1178-Ar

ATGTCACCTATTAAGCATGTTGCCATCTACGGCAAGGGAGGTATTGGAAAGTCCTGCATAGCATCAAATGTGG  
CGGCTGCATGCGCCGAACGCGGGGTGAGGTCCTGGTTCGTCGGATGCGACCCGAAGAGCGACTCCTCGATAAA  
TCTCATAGGACGAAGGATGCCACGATGATGGACATGATCCGGGAGGGGAAGGAGATCCGTGAGGAGGATGTC  
GTCTTACAGGATACAGAGGAGTGAGGTGCATAGAGGTGCGCGGCCCGAGCCGGGAGTCCGATGCGCTGGCA  
GGGAATAATAGTGGCAATAGATTTCCCTTAGAAAGGTCTCCAGGATAATGGATGATGTAGACCTCGTGCTATA  
TGACGTTCCCGGGGATATCGTGTGTGGTGGATTCTCAGCCCCGATAAGAAAGGGTCTCGTACGGAGGCGTAC  
ATAATAACATCTGGGGAGTACATGCCTGTTTACGCTGCCAACACATATGCAGGGGCCTGAAGCGGCTTGGGG  
CAAGGCTCGCCGGGGTTCGTTTGAACCTCCAGGGATGTTGAGGGGGAGAGGGAGATCGTCGATGATTTCCGCAG  
GGCGATAGGTAGCAGGATGGTTCGTTTACATACAAAAGATCCCGTTGTACAGAGGTGCGAGAGGAGAGCTGTA  
ACGGTATCGAGGGTGAGCCTGAAAGCAGCATCGCAGGGGTTTATCGCGCCCTCGCAGAGCATGTTCTGAGCT  
GTACGGATGCATCGGTGCCGAGCCGCTCGACGACGAGAGTCTGCGTGAGATAACAAGGATGTGA

>mpd\_MCP\_0364-Ar

ATGAAGAAGCAGCTGGCCATATACGGGAAGGGCGGCATCGGAAAGTCCTCGACGGCCTCGAACGTGGCCGCGG  
CCATGGGCGAAAAGGGCATCAGGGCCATGCTCATCGGGTGCGACCCGAAGAGCGACTCGTCCATCACGCTGCT  
CGGCGGAAGGCGGATGCCACCATCATGGACACCCTGCGAAAAAGGGCTCCATCGAGGAAGAGGACGTGGTA  
TTCGAGGGCTTCAACGGGGTAAAGTGCGCCGAGGTGCGCGGCCCGAGCCCGGCGTGGGCTGCGCCGGGAGGG  
GCATCATCGTGGCCGTCCAGGCGCTGCAAAAAGTATGCGACGCCATGAAAGATTCCGACGTAATTATATACGA  
CGTCCCGGGCGACATCGTGTGCGGCGGATTCGCCGTGCCCATCACGAAGGGCATGGTGGAGGAGGCGTACATC  
ATCACTTCGGGCGAGTACATGCCGCTCTACGCCGCCAACAAATATCTGCCGGGGCCTGAAGACGCTGAACACTC  
CGTGTCCGGCGTGATCTGCAACGAGAGGGAGGCGGAGCACGAGAGGGAGATCGTCCGAAAAGTTCGCCGCCGC  
CCTGGGAGTGCCCATGCTGGCGTACATACCCCGGGACAAGCTCGTGCAGAACTGCGAGCGCGCCGGCAGGAGC  
GTCATCGAGGGCGCGCCGGGCTCGGAGATGGCCGGAGTATACCGGTTACTGGCCGACCCGATACTGACGGAAA  
AAGATAAAAAGGTTCCCGATTTCATTAGAAGACGAAGACCTGAGGAAGCTAACCCAATGA

>rci\_RCIX2002-Ar

TTGAAACAGTCTACGAGCCAGAAGCAATTGGCAGTCTATGGCAAGGGCGGCATCGGCAAGTCTACTACGGCTT  
CGAACATGGCCGACGCGCTGGGGGAGATGGGGAAGAAAAGTCAATGCTCATCGGGTGCGATCCCAAGAGTGACTC  
TTCTATTACTCTGCTCGGCGGCCGCGCATCCCCACTATTATGGACACGGTCAGGGAGCGGAAGAATAAGATC  
GATGGTATTAAGAAGAAGACGTGGTCTTCAAGGCTTCGGCGGCGTCAGGTGTACCGAAGTGGGCGGCCCGG  
AGCCCGGCATCGGCTGTGCCGGCAGGGGCATCATTGTTGCTGTGATGTGCTCATGAAGAAATTCGACTTTTCAT  
GAAAGAGGCGGATGTCTGATCTTCGACGTGCCGGGCGACATCGTATGCGGAGGCTTCGCCGTCCCCATCACC  
AAAAGATGGTCAGCGAAGCATATATTACTTCCGGGGAGTACATGCCCTGTATGCGGCGAACAAACATAT  
GCCGGGGCCTCAACACCCTCAGGACTCCGCTCGGCGGCATCATCTGCAACGAGCGGGAGGCGGCGGACGAAAA  
AGAGATCGTCCGACGGTTTGCAGGACGCGCTGGGCGTGCCGCTGCTGTATACATTTCCCGCAGCCGGATCGTC  
CAGCAGTGCAGCGGGAGGGGAAGACCGTCATAGAGGCAAGCCCTGACTCAGGGACCGCTTCAATTTACAGAG  
GTCTCGCAGCGAAAAGTTTTAATGAAAAGGATAATAAGGTTCCAGAAGCATTAGAAGACGCATACCTGAGGGA  
ACTGACACTATTATGA

>mla\_Mlab\_0165-Ar

ATGAGACAGATCGCCCTCTATGGAAAGGGAGGTATTGGAAAATCCACTACATCGGC AAAATCTTTCGGCGGCAT  
TTTCGGAGATGGACCTGGATGTCATGCAGATCGGGTGTGACCCGAAACACGACAGCACACGGATGCTCATGCA  
CGGACGCTGGATCCCGACCGTTCTTGAGCAGATGTATGATCATAAAGAGATCAAAAGCGAGGACATCATCTAT  
CAGGGATTTGGAAACATCCGCTGTGTGCGAGGCTGGAGGGCCGGAGCCCGGGATCGGGTGTGCAGGCAGAGGAA  
TCATCGCAACATTCCAGCTTCTGGAAAAGATGGATGCTCTCTACGGAGACGTTGTCTGTATACGATGTTCTCGG  
GGACGTTGTCTGCGGAGGGTTTGGCGATGCCGATGCGTGACGGCTATGCGCAGGAAGTGTATCTTGTAACAAGC  
GGAGAGCTGATGAGTCTCTATGCTGCAAACAATATCTGCAAAGCGATCGCGAGAATATCCGAACGAAGCACGG  
CAAAATGCCGGCTTGGTGGAGTGATCTGCAATGCAAAGAATATGGATAACGAACGCGAACTTGTGAGGAGTT  
TGCAAAAAGGATCGGATCACGCCTTGTCTGTTATATTCCACGAAGCAAATCGGTCAGAGCAGCGGAGGTGAAC  
TGTATGACGGTCATCGAACACGATCCAACATCGGAACAGGCGGCCGTCTACCGGGACTGTGCCAAAACCATTC  
TGAAAACACCGATCTTCGGATTCCGACCCCGCTTGCAATTAGAGGAACTGGAAGAGCTTGCAAGACACTATCT  
CTGA
